# Supplementary material for: Dramatic Improvement of Proteomic Analysis of Zebrafish Liver Tumor by Effective Protein Extraction with Sodium Deoxycholate and Heat Denaturation
Source: Int J Anal Chem. 2015 Mar 19;2015:763969. doi: 10.1155/2015/763969 (PMC4383156; doi:10.1155/2015/763969)
Supplement: Supplementary file 1 — The Supplementary material contains our identified protein list from our 1D shotgun analysis for both DOCΔX (Supplementary Table 1) and SDSΔX (Supplementary Table 2) samples. Supplementary Table 3 contains our identified protein list from our 2D shotgun analysis for DOCΔX sample. Supplementary Table 4 contains the list of representative “canonical pathways” and “diseases and biological functions” with the respective proteins from our identified protein list from Supplementary Table 3 that we obtained from our pathway analysis using IPA. Supplementary Data 1 contains the chromatograms from our 1D (both DOCΔX and SDSΔX) and 2D shotgun analysis (DOCΔX). [file 763969.f1.zip]

Archive with 5 entries (5 files):
- Supplementary_Data_1.pdf
- Supplementary_Table_1.xls
- Supplementary_Table_2.xls
- Supplementary_Table_3.xls
- Supplementary_Table_4.xls
