# Supplementary material for: Dramatic Improvement of Proteomic Analysis of Zebrafish Liver Tumor by Effective Protein Extraction with Sodium Deoxycholate and Heat Denaturation
Source: Int J Anal Chem. 2015 Mar 19;2015:763969. doi: 10.1155/2015/763969 (PMC4383156; doi:10.1155/2015/763969)
Supplement: Supplementary file 1 — The Supplementary material contains our identified protein list from our 1D shotgun analysis for both DOCΔX (Supplementary Table 1) and SDSΔX (Supplementary Table 2) samples. Supplementary Table 3 contains our identified protein list from our 2D shotgun analysis for DOCΔX sample. Supplementary Table 4 contains the list of representative “canonical pathways” and “diseases and biological functions” with the respective proteins from our identified protein list from Supplementary Table 3 that we obtained from our pathway analysis using IPA. Supplementary Data 1 contains the chromatograms from our 1D (both DOCΔX and SDSΔX) and 2D shotgun analysis (DOCΔX). [file 763969.f1.zip › Supplementary_Table_1.xls]

## Sheet: Sheet1
N	Unused	Total	% Cov	Accession #	Name	Species	Peptides(95%)
1	99.59	99.59	85.3	IPI01016814.1	bhmt Uncharacterized protein	7955	87
2	92.19	92.19	88.6	IPI00497753.5	gapdh Glyceraldehyde-3-phosphate dehydrogenase	7955	106
3	90.83	90.83	67	IPI00993204.1	aldh1l1 Uncharacterized protein	7955	61
4	78.93	79.54	69.4	IPI00483853.1	glud1b glutamate dehydrogenase 1b	7955	73
5	77.47	77.91	85.4	IPI00505489.1	zgc:56326 4-hydroxyphenylpyruvate dioxygenase	7955	59
6	73.43	73.95	56.4	IPI01024186.1	pygl Phosphorylase	7955	51
7	71.98	71.98	69.2	IPI00996298.1	aldob Fructose-bisphosphate aldolase	7955	75
8	71.06	71.15	61.7	IPI00512240.1	ef1a Elongation factor 1-alpha	7955	66
9	69.73	69.73	59.9	IPI00487988.2	pklr Pyruvate kinase	7955	52
10	67.16	67.57	39.7	IPI00931821.2	zgc:123047 Uncharacterized protein	7955	39
11	66.99	67.43	73.4	IPI00490877.3	eno3 beta-enolase	7955	54
12	65.2	65.2	89.7	IPI00496071.2	fabp10a Fatty acid-binding protein 10-A, liver basic	7955	96
13	62.77	62.77	72	IPI00490006.2	bactin2 Actin, cytoplasmic 2	7955	66
14	62.41	62.41	74.8	IPI00489722.3	adh8a Alcohol dehydrogenase 8a	7955	73
15	58.55	58.55	74.2	IPI00506482.3	fbp1b Uncharacterized protein	7955	55
16	58.19	58.49	59	IPI00491975.2	atp5a1 ATP synthase subunit alpha	7955	43
17	57.71	57.71	62.6	IPI00897805.2	zgc:111961 ATP synthase subunit beta	7955	41
18	56.89	56.89	65.6	IPI00773405.3	oxct1b Uncharacterized protein	7955	47
19	54.29	55.65	95.8	IPI00482837.3	hbaa1 Hemoglobin subunit alpha	7955	77
20	53.14	53.14	64.2	IPI00497325.2	pck2 Zgc:77867	7955	41
21	52.12	52.12	63.5	IPI00996621.1	cat Catalase	7955	43
22	50.32	50.32	93.2	IPI00493081.3	ba2;ba2l;ba1l;ba1 Hemoglobin subunit beta-1	7955	75
23	48.92	49.4	66.1	IPI00506192.2	ahcy Adenosylhomocysteinase	7955	48
24	46.7	46.81	62.4	IPI00500752.4	zgc:113050 Uncharacterized protein	7955	35
25	45.76	45.76	69	IPI00852151.1	grhprb Uncharacterized protein	7955	41
26	43.87	44.1	43.7	IPI00486027.1	krt8 Keratin, type II cytoskeletal 8	7955	30
27	43.78	43.78	66.9	IPI00502437.4	agxtb Uncharacterized protein	7955	41
28	42.39	42.52	63.1	IPI00632486.4	pgm1 Phosphoglucomutase 1	7955	32
29	42.16	42.53	50.2	IPI00506057.1	hsp90b1 Uncharacterized protein	7955	28
30	41.89	42.12	38.8	IPI00934288.1	mthfd1 Methylenetetrahydrofolate dehydrogenase	7955	24
31	41.71	41.79	22.7	IPI00851793.5	si:ch211-93f2.1 Uncharacterized protein	7955	25
32	40.42	40.42	56	IPI00508477.1	ldhbb L-lactate dehydrogenase B-B chain	7955	35
33	40.36	40.95	61.2	IPI00504274.1	hgd Uncharacterized protein	7955	32
34	39.43	39.43	74.7	IPI00994508.1	- Uncharacterized protein	7955	29
35	39.07	39.37	41.7	IPI00511483.1	eef2b Uncharacterized protein	7955	23
36	38.6	38.74	77	IPI00499224.2	zgc:162356 Uncharacterized protein	7955	32
37	38.07	38.07	49.3	IPI00497986.2	p4hb protein disulfide-isomerase	7955	27
38	36.96	36.96	42.1	IPI00498510.1	tkt transketolase-like protein 2	7955	27
39	36.51	36.51	42.1	IPI01016955.1	zgc:63647 Novel protein similar to vertbrate ormiminotransferase cyclodeaminase (Fragment)	7955	22
40	36.42	36.55	44.8	IPI00932942.1	hspa8 HSC70 protein	7955	22
41	35.76	36.13	55.6	IPI00511623.2	got2a Aspartate aminotransferase	7955	23
42	35.4	35.52	58.8	IPI00489732.4	suclg2 Uncharacterized protein	7955	24
43	35.08	35.15	44.9	IPI00932564.2	idh1 Isocitrate dehydrogenase	7955	25
44	34.45	34.45	52.4	IPI00512371.1	aldh6a1 methylmalonate-semialdehyde dehydrogenase [acylating], mitochondrial	7955	27
45	33.73	36.14	67.6	IPI00495240.1	mdh1a Malate dehydrogenase	7955	31
46	33.34	33.63	63.8	IPI00508365.2	pgk1 Phosphoglycerate kinase	7955	24
47	32.03	32.03	62.6	IPI00637094.3	LOC792474;anxa4 Uncharacterized protein	7955	21
48	31.22	31.22	73.6	IPI00502668.2	gstp1 glutathione S-transferase pi	7955	26
49	31.12	31.28	61.9	IPI00506249.4	ckba Zgc:154095	7955	22
50	30.83	30.99	60	IPI00497681.2	zgc:92630 Uncharacterized protein	7955	27
51	30.6	30.63	63.4	IPI00495830.1	apoa1 Apolipoprotein A-I	7955	20
52	30.02	30.02	48.3	IPI00487495.4	pah Phenylalanine hydroxylase	7955	20
53	30	30	77.8	IPI00484161.2	tpi1b Triosephosphate isomerase B	7955	20
54	29.95	30.1	80.2	IPI00628282.3	gstt1a Uncharacterized protein	7955	32
55	29.75	29.75	69.2	IPI00510828.2	mat1a S-adenosylmethionine synthase	7955	29
56	29.2	29.51	29.1	IPI00502639.1	dpyd Dihydropyrimidine dehydrogenase [NADP+]	7955	17
57	28.71	29.3	38.8	IPI01016831.1	acsf2 acyl-CoA synthetase family member 2, mitochondrial precursor	7955	16
58	28.58	36.47	52.6	IPI00505750.3	hspa5 Uncharacterized protein	7955	26
59	28.45	28.71	54.6	IPI00491168.3	LOC555748 Uncharacterized protein	7955	26
60	26.84	27.21	39.2	IPI00994130.1	tuba8l3 Uncharacterized protein (Fragment)	7955	20
61	26.58	26.7	56.2	IPI00500184.3	acaa2 Zgc:56036	7955	18
62	26.13	26.13	77.2	IPI00482908.3	prdx2 Uncharacterized protein	7955	16
63	26.05	26.05	45.1	IPI00494761.3	fah Fumarylacetoacetate hydrolase	7955	17
64	25.97	26.38	49.3	IPI00481049.1	acat1 Acetyl-CoA acetyltransferase, mitochondrial	7955	16
65	25.3	25.3	50.3	IPI00507561.3	agmat Zgc:153353	7955	21
66	24.89	24.95	58.6	IPI00494543.2	hsdl2 Hydroxysteroid dehydrogenase-like protein 2	7955	18
67	24.82	24.89	62.3	IPI00512157.1	zgc:64133 Malate dehydrogenase	7955	16
68	24.75	24.75	43.6	IPI00934329.1	tubb2c Tubulin, beta, 2	7955	22
69	24.44	24.44	50	IPI00995610.1	gpd1b Uncharacterized protein	7955	16
70	24.39	24.5	36.5	IPI00997088.1	tfa Uncharacterized protein	7955	17
71	24.39	24.45	25.3	IPI00511660.7	dmgdh dimethylglycine dehydrogenase, mitochondrial	7955	14
72	24.2	24.2	66.1	IPI00495740.1	uox Uricase	7955	16
73	23.88	23.88	79.7	IPI00491514.1	fabp3 Uncharacterized protein	7955	18
74	23.8	23.92	17.5	IPI00486876.4	agl amylo-1, 6-glucosidase, 4-alpha-glucanotransferase	7955	14
75	23.34	23.64	41.9	IPI00508003.2	hspd1 Uncharacterized protein	7955	18
76	23.23	23.52	62.8	IPI00498898.1	ywhabb 14-3-3 protein beta/alpha-B	7955	21
77	23.08	23.13	29.5	IPI00972024.2	me1 Malic enzyme	7955	15
78	22.51	22.61	25.9	IPI00505091.2	vcp Transitional endoplasmic reticulum ATPase	7955	12
79	22.47	22.47	29.8	IPI00509533.6	pdia3 protein disulfide isomerase family A, member 3	7955	15
80	22	22.6	21.1	IPI00505730.2	atp1a1 ATPase, Na+/K+ transporting, alpha 1 polypeptide	7955	13
81	21.54	21.59	15.3	IPI00963174.1	si:dkey-76b14.4 Uncharacterized protein	7955	11
82	21.09	21.35	47	IPI00492110.2	slc25a5 Uncharacterized protein	7955	13
83	20.92	21.02	29.6	IPI00617410.3	aco1 Iron regulatory protein 1	7955	12
84	20.77	21.11	47.6	IPI00635755.1	acat2 Uncharacterized protein	7955	12
85	20.59	20.59	18.8	IPI00618299.5	LOC559212 1,4-alpha-glucan-branching enzyme-like	7955	13
86	20.35	21.86	57.5	IPI00503480.4	zgc:193613 Zgc:193613	7955	18
87	20.17	20.22	69.6	IPI00499748.5	gpx1a glutathione peroxidase 1	7955	13
88	19.9	20.01	33.8	IPI00801488.4	zgc:158138 Zgc:158138 protein	7955	13
89	19.69	19.69	17.3	IPI00929039.3	myh9l1 myosin-9, partial	7955	11
90	19.61	21.66	43.2	IPI00506920.1	got1 Aspartate aminotransferase	7955	15
91	19.35	19.35	41.2	IPI00994921.1	shmt1 Serine hydroxymethyltransferase	7955	19
92	19.28	23.29	50.9	IPI00497275.1	agxta Alanine-glyoxylate aminotransferase, like	7955	22
93	19.17	19.28	20.8	IPI00481475.5	sardh Uncharacterized protein	7955	14
94	18.53	18.53	21	IPI00508338.1	actn4 Actn4	7955	11
95	18.27	18.35	41.7	IPI00487440.1	aldh4a1 Delta-1-pyrroline-5-carboxylate dehydrogenase, mitochondrial	7955	13
96	18.23	18.23	28.2	IPI00506014.4	hspa9 Heat shock protein 9	7955	12
97	18.18	20.71	26.8	IPI00995843.1	hsp90ab1 Uncharacterized protein	7955	17
98	18.06	18.11	63.2	IPI00497513.2	zgc:92739 heat-responsive protein 12-like isoform 2	7955	12
99	17.91	17.91	30.4	IPI00817143.2	gpt2l Isoform 1 of Alanine aminotransferase 2-like	7955	11
100	17.82	17.82	37.1	IPI00498442.1	gdi2 Uncharacterized protein	7955	10
101	17.6	17.83	34.8	IPI00494371.3	krt18 Keratin, type I cytoskeletal 18	7955	18
102	17.58	17.64	36.4	IPI00914375.2	sord sorbitol dehydrogenase	7955	15
103	17.56	17.77	25.3	IPI00493820.2	snd1 Uncharacterized protein	7955	10
104	17.51	17.61	65.6	IPI00490809.1	sod1 Superoxide dismutase [Cu-Zn]	7955	18
105	17.09	17.19	30.8	IPI00489851.2	aldh8a1 Aldehyde dehydrogenase family 8 member A1	7955	11
106	17.04	17.04	48.6	IPI00507986.1	rps3 Uncharacterized protein	7955	13
107	16.92	17.12	29.6	IPI00483375.2	aldh7a1 Uncharacterized protein	7955	13
108	16.9	16.9	59.4	IPI00482761.2	gstm Uncharacterized protein	7955	9
109	16.72	16.72	17.7	IPI00500510.2	mtp Microsomal triglyceride transfer protein	7955	9
110	16.67	16.69	42.9	IPI00509740.1	zgc:103585 3-hydroxyanthranilate 3,4-dioxygenase	7955	12
111	16.33	16.68	65.5	IPI00483862.1	zgc:77734 diazepam binding inhibitor	7955	13
112	16.14	16.14	27.8	IPI00892413.1	dpys Uncharacterized protein	7955	10
113	16	16	38.9	IPI01024243.1	rplp0 Uncharacterized protein	7955	11
114	15.98	15.98	27	IPI00491587.2	pgd 6-phosphogluconate dehydrogenase, decarboxylating	7955	9
115	15.95	16.02	45.8	IPI00513166.1	rgn Regucalcin	7955	13
116	15.87	15.98	23.5	IPI01023991.1	aco2 Uncharacterized protein	7955	9
117	15.63	17.16	60.5	IPI00495615.1	zgc:92880 Zgc:92880	7955	13
118	15.09	15.18	30.9	IPI00955573.1	gcat 2-amino-3-ketobutyrate coenzyme A ligase, mitochondrial	7955	9
119	14.97	15.07	23.9	IPI00511568.2	dldh Dihydrolipoyl dehydrogenase	7955	9
120	14.9	14.9	72.6	IPI00484580.2	rbp2a Uncharacterized protein	7955	13
121	14.68	14.83	60.8	IPI00997880.1	nme2b.2 Nucleoside diphosphate kinase	7955	9
122	14.67	14.67	58.5	IPI00508226.4	ppia Peptidyl-prolyl cis-trans isomerase	7955	10
123	14.48	14.48	14.8	IPI00921737.1	kmo Kynurenine 3-monooxygenase	7955	10
124	14.41	14.49	45.7	IPI00512573.1	prdx6 Uncharacterized protein	7955	8
125	14.32	14.59	35.9	IPI00639559.1	acadm Acyl-Coenzyme A dehydrogenase, C-4 to C-12 straight chain	7955	10
126	14.2	14.42	33.9	IPI00507539.2	aldh9a1a Aldehyde dehydrogenase family 9 member A1-A	7955	8
127	14.2	14.2	45.9	IPI00512800.1	ndrg1 Uncharacterized protein	7955	10
128	14.16	14.2	35.1	IPI00511820.2	decr1 Uncharacterized protein	7955	9
129	14.13	14.33	21.3	IPI00502496.1	ehhadh Peroxisomal bifunctional enzyme	7955	7
130	14.1	14.1	46.7	IPI00507097.1	gnb2l1 Guanine nucleotide-binding protein subunit beta-2-like 1	7955	9
131	14.08	14.12	49.3	IPI00507846.1	gnmt Glycine N-methyltransferase	7955	11
132	14.03	14.37	25.9	IPI00771899.2	acox1 Acyl-coenzyme A oxidase	7955	7
133	14.01	14.1	36.6	IPI00993110.1	etfa Uncharacterized protein	7955	9
134	13.78	13.78	42.2	IPI00997392.1	sult2st2 Uncharacterized protein	7955	7
135	13.5	13.6	9.8	IPI01027913.1	fasn fatty acid synthase	7955	9
136	13.18	13.22	35.6	IPI00495614.1	taldo1 Transaldolase	7955	9
137	13.14	13.14	38.9	IPI00852165.1	rps19 Uncharacterized protein	7955	8
138	12.97	12.97	25.1	IPI00504336.2	adka Uncharacterized protein	7955	8
139	12.6	12.6	34.3	IPI00877464.1	cbr1l 20 beta-hydroxysteroid dehydrogenase	7955	11
140	12.53	40.19	60.7	IPI00854285.3	aldh2b Aldh2b protein	7955	33
141	12.48	12.48	37.8	IPI00484255.3	acaa1 Uncharacterized protein	7955	11
142	12.39	12.46	26.2	IPI00500902.4	g6pd Glucose-6-phosphate 1-dehydrogenase	7955	7
143	12.37	18.77	13.6	IPI00505602.4	c3b Uncharacterized protein	7955	10
144	12.29	12.29	44.9	IPI00500119.1	ppib Peptidyl-prolyl cis-trans isomerase	7955	7
145	12.17	12.17	30.2	IPI00489824.2	hpx Hemopexin	7955	9
146	12.13	12.13	16.3	IPI00972523.1	eef1g Elongation factor 1-gamma	7955	7
147	12.12	16.21	28.5	IPI00972663.1	shmt2 Uncharacterized protein (Fragment)	7955	11
148	12.03	12.19	54.9	IPI00998923.1	- Histone H2B	7955	8
149	12.03	12.03	39.2	IPI00508793.1	sdr16c5 Uncharacterized protein	7955	6
150	12	12.14	53.9	IPI00509732.5	rpl12 Ribosomal protein L12	7955	9
151	11.89	11.89	21	IPI00638974.3	si:dkey-239i20.2 Si:dkey-239i20.2	7955	7
152	11.85	21.07	51.2	IPI00495855.6	ldhba L-lactate dehydrogenase B-A chain	7955	19
153	11.69	11.69	12.8	IPI00495281.1	gys2 Uncharacterized protein	7955	8
154	11.61	11.74	22.7	IPI00502344.1	eif4a1a eukaryotic translation initiation factor 4A, isoform 1A	7955	7
155	11.41	11.5	29.9	IPI00492814.2	etfb Etfb protein	7955	6
156	11.39	11.39	24	IPI00506951.1	pdhb Uncharacterized protein	7955	6
157	11.38	11.47	33	IPI00512330.2	hadh Uncharacterized protein	7955	6
158	11.38	11.38	40.7	IPI00498786.2	suclg1 Succinate-CoA ligase, GDP-forming, alpha subunit	7955	9
159	11.36	11.36	27.3	IPI00509716.2	amdhd1 Probable imidazolonepropionase	7955	9
160	11.22	11.22	28.9	IPI00487456.4	gpia Glucose-6-phosphate isomerase	7955	9
161	11.09	11.24	40.2	IPI00490409.3	adh5 Uncharacterized protein	7955	7
162	11	11.04	60.4	IPI00997618.2	LOC100538129 histone H4-like	7955	7
163	10.6	10.6	27.7	IPI01027899.1	zgc:66382 Uncharacterized protein	7955	14
164	10.46	10.52	23.2	IPI00483251.2	amt Aminomethyltransferase	7955	8
165	10.27	10.45	18	IPI00516121.1	ephx2 Epoxide hydrolase 2, cytoplasmic	7955	6
166	10.23	10.26	33.6	IPI00512534.5	calrl Calreticulin like	7955	7
167	10.21	10.27	30.2	IPI00975369.3	ctsd Uncharacterized protein	7955	7
168	10.19	10.19	17.4	IPI00507572.1	pdia4 Protein disulfide isomerase associated 4	7955	6
169	10.15	10.32	9.1	IPI00865996.2	spna2 Alpha II-spectrin	7955	5
170	10.14	10.17	18.1	IPI00511624.5	pcca Propionyl-Coenzyme A carboxylase, alpha polypeptide	7955	5
171	10.12	10.12	26.8	IPI00503163.2	abat 4-aminobutyrate aminotransferase, mitochondrial	7955	6
172	10.11	10.11	19.2	IPI00498671.4	hao1 Hao1 protein	7955	5
173	10.1	10.1	47.8	IPI00484712.2	atp5h Uncharacterized protein	7955	7
174	10.02	12.84	63	IPI01024384.1	fabp7a Uncharacterized protein	7955	11
175	10	10	17.9	IPI00962153.1	chdh choline dehydrogenase, mitochondrial-like	7955	5
176	10	10	18.5	IPI00512192.2	zgc:55856 Zgc:55856 protein	7955	6
177	10	10	16.2	IPI00489091.6	zgc:194768 Zgc:194768	7955	5
178	10	10	49.7	IPI00488350.1	cox5aa;LOC100537689 Uncharacterized protein	7955	5
179	10	10	56.4	IPI00509551.3	calm2b;calm2a;calm3b;calm1a;calm1b;calm3a Calmodulin	7955	8
180	9.93	9.93	36.1	IPI00505672.3	rps8 40S ribosomal protein S8	7955	7
181	9.9	10.08	35.1	IPI00502389.1	echs1 Uncharacterized protein	7955	5
182	9.89	9.89	21	IPI00490042.1	zgc:101129 Zgc:101129	7955	5
183	9.78	9.85	30.8	IPI00836013.1	cbsa Uncharacterized protein	7955	5
184	9.76	9.83	38.1	IPI00509532.2	gstal Glutathione S-transferase	7955	6
185	9.46	11.22	48.5	IPI00495689.4	rbp2b Uncharacterized protein	7955	11
186	9.42	9.46	18.3	IPI00998575.1	cyp2j28 Uncharacterized protein (Fragment)	7955	6
187	9.42	9.46	35.7	IPI00515988.1	sat2 Uncharacterized protein	7955	5
188	9.41	9.42	46.9	IPI00513472.1	rps7 40S ribosomal protein S7	7955	6
189	9.17	9.2	25.2	IPI00498913.1	zgc:63602 Zgc:63602	7955	5
190	9.1	9.1	16	IPI00498284.1	fgg Uncharacterized protein	7955	5
191	9.09	9.09	32.6	IPI00505507.4	upb1 Ureidopropionase, beta	7955	4
192	8.85	9	34.4	IPI00508284.1	rpsa 40S ribosomal protein SA	7955	6
193	8.85	8.85	24.4	IPI00481307.1	rpl7a Uncharacterized protein	7955	5
194	8.75	8.79	13.5	IPI00495887.1	hsd17b4 Hsd17b4 protein	7955	4
195	8.73	8.76	17.6	IPI00494197.1	hadhb Hydroxyacyl-Coenzyme A dehydrogenase/3-ketoacyl-Coenzyme A thiolase/enoyl-Coenzyme A hydratase (Trifunctional protein), beta subunit	7955	5
196	8.69	8.79	14.3	IPI00488653.2	slc27a2 Solute carrier family 27 (Fatty acid transporter), member 2	7955	4
197	8.65	8.65	31.5	IPI00614265.1	zgc:92869 Zgc:113898	7955	7
198	8.61	8.61	27	IPI00817939.2	nqo1 NAD(P)H dehydrogenase [quinone] 1 isoform 1	7955	5
199	8.56	10.13	28.1	IPI00490232.4	ckmt1 Uncharacterized protein	7955	5
200	8.55	8.56	33.7	IPI00851355.2	dera 2-deoxyribose-5-phosphate aldolase homolog	7955	4
201	8.49	8.55	27.2	IPI00484825.2	akr1a1a Alcohol dehydrogenase [NADP+] A	7955	5
202	8.4	8.45	11.3	IPI01007423.1	LOC100006895 alpha-2-macroglobulin-like isoform 2	7955	5
203	8.35	8.35	32.1	IPI00500824.5	rpl7 Ribosomal protein L7	7955	5
204	8.31	8.31	28	IPI01023720.1	rps25 15 kDa protein	7955	5
205	8.29	8.29	36.8	IPI00490073.1	rps18 40S ribosomal protein S18	7955	4
206	8.23	8.23	26.4	IPI00481177.2	zgc:103601 Zgc:103601	7955	5
207	8.18	8.35	18.9	IPI00656473.2	ugt1a1 UDP glycosyltransferase 1 family, polypeptide A1 precursor	7955	5
208	8.17	14.7	64	IPI00497774.1	ppial Peptidyl-prolyl cis-trans isomerase	7955	10
209	8.16	8.16	20.2	IPI00490234.2	cct8 Chaperonin containing TCP1, subunit 8	7955	4
210	8.15	8.34	21.8	IPI01023874.1	cth Uncharacterized protein	7955	4
211	8.14	8.46	18.2	IPI00493061.2	scp2 Uncharacterized protein	7955	5
212	8.11	8.66	6.8	IPI00503447.1	apobl Uncharacterized protein	7955	4
213	8.11	8.16	16.3	IPI00501169.2	fgb Uncharacterized protein	7955	5
214	8.07	22.22	42.3	IPI00501009.2	got2b Aspartate aminotransferase	7955	14
215	8.07	8.09	22.9	IPI00496979.2	uqcrc1 Uncharacterized protein	7955	4
216	8.05	8.05	28.5	IPI00483912.1	rdh1l Retinol dehydrogenase 1, like	7955	5
217	8.01	11.54	19.9	IPI00501493.2	anxa11a Uncharacterized protein	7955	8
218	8.01	8.04	58.8	IPI00773429.2	rplp2l Uncharacterized protein	7955	8
219	8.01	8.04	15.5	IPI00510954.1	mao Amine oxidase [flavin-containing]	7955	4
220	8	8.1	18.1	IPI00506328.2	bscv Adipocyte plasma membrane-associated protein	7955	6
221	8	8.01	24.9	IPI00490609.2	zgc:92237 40S ribosomal protein S6	7955	4
222	8	8	35.7	IPI00499593.4	zgc:162944 Zgc:162944 protein	7955	7
223	8	8	22.1	IPI00489232.2	psme2 Uncharacterized protein	7955	4
224	8	8	53	IPI00506488.1	rplp2 Uncharacterized protein	7955	5
225	7.96	8.28	12.2	IPI00512526.6	gldc Uncharacterized protein	7955	4
226	7.9	8.14	19.6	IPI00481966.1	lcp1 Plastin-2	7955	7
227	7.89	7.89	37.3	IPI00997500.1	nme4 Nucleoside diphosphate kinase	7955	5
228	7.82	24.23	49.5	IPI00503318.3	adh8b Uncharacterized protein	7955	23
229	7.66	7.68	28.9	IPI00484135.7	acmsd Acmsd protein	7955	6
230	7.65	7.79	31.9	IPI00507638.2	hnrnpa0 Heterogeneous nuclear ribonucleoprotein A0	7955	4
231	7.59	7.59	25	IPI00650582.5	zgc:114157 Catechol O-methyltransferase	7955	4
232	7.57	7.57	26.2	IPI00799748.1	zgc:153034 Zgc:153034	7955	5
233	7.54	7.67	22.3	IPI00500416.1	idh2 Isocitrate dehydrogenase	7955	4
234	7.51	7.69	24.2	IPI00516101.1	zgc:103559 Zgc:103559	7955	4
235	7.5	7.5	31.9	IPI00500253.1	rpl10a 60S ribosomal protein L10a	7955	4
236	7.47	7.47	13.5	IPI00863600.2	agxt2 Zgc:114195	7955	4
237	7.38	7.56	11.5	IPI00483019.1	hyou1 Hypoxia up-regulated protein 1	7955	4
238	7.36	7.38	28.2	IPI00503812.2	gamt Guanidinoacetate N-methyltransferase	7955	6
239	7.31	7.37	15.5	IPI00487194.4	fga fibrinogen alpha chain	7955	4
240	7.27	7.27	39	IPI00633389.1	rps16 Uncharacterized protein	7955	5
241	7.25	7.25	34.6	IPI00490401.4	atp5c1 ATP synthase gamma chain	7955	5
242	7.19	7.19	22.5	IPI00484111.3	zgc:92726 Proteasome subunit alpha type	7955	4
243	7.06	7.06	32.6	IPI00497887.1	zgc:85829 Zgc:85829	7955	4
244	7	8.52	58.7	IPI00619777.1	si:ch211-5k11.6 Si:xx-by187g17.5	7955	14
245	6.94	7.08	17.1	IPI00484788.2	pdha1a Uncharacterized protein	7955	5
246	6.88	6.88	35.9	IPI00481915.2	rpl6 Uncharacterized protein	7955	4
247	6.8	6.94	14.4	IPI00772079.5	LOC564077 Uncharacterized protein	7955	5
248	6.75	6.76	12.5	IPI00612969.1	aars alanyl-tRNA synthetase, cytoplasmic isoform 1	7955	5
249	6.74	7.54	31.3	IPI00614907.2	prdx3 Uncharacterized protein	7955	7
250	6.74	6.92	12.1	IPI00507226.7	aass aminoadipate-semialdehyde synthase	7955	5
251	6.61	6.61	28.5	IPI00489033.1	cahz Carbonic anhydrase	7955	5
252	6.59	6.74	28.7	IPI00488038.1	fh Fumarate hydratase, mitochondrial	7955	5
253	6.56	6.56	38.1	IPI00510559.3	rpl10 Uncharacterized protein	7955	5
254	6.48	17.1	36.4	IPI00504812.3	gpd1 Uncharacterized protein	7955	10
255	6.47	6.61	42.3	IPI00510668.3	rps3a 40S ribosomal protein S3a	7955	3
256	6.45	6.45	12.8	IPI00486103.1	cpne1 Uncharacterized protein	7955	5
257	6.42	6.44	19	IPI00995035.1	cct6a Uncharacterized protein	7955	3
258	6.32	6.32	77.3	IPI00650873.2	zgc:195154 Thymosin beta-11	7955	5
259	6.29	6.35	44.8	IPI00555420.1	zgc:114188 Zgc:114188	7955	5
260	6.19	6.23	24.2	IPI00612598.3	rdh1 Retinol dehydrogenase 1	7955	3
261	6.19	6.22	45.2	IPI00489853.1	rps10 Uncharacterized protein	7955	4
262	6.19	6.19	36.5	IPI00512373.2	atp5d Uncharacterized protein	7955	4
263	6.18	6.18	20.1	IPI00897561.10	acadl Uncharacterized protein	7955	4
264	6.15	6.15	25.1	IPI00505335.3	ppa1 Uncharacterized protein	7955	3
265	6.14	6.21	37.5	IPI00502356.1	zgc:65996 Zgc:65996	7955	3
266	6.12	6.17	11.6	IPI00508544.2	dlst Dihydrolipoamide S-succinyltransferase	7955	3
267	6.12	6.12	15.5	IPI00505526.1	rpl4 Uncharacterized protein	7955	4
268	6.09	6.09	19	IPI00994860.1	apoa4 Uncharacterized protein (Fragment)	7955	4
269	6.09	6.09	33.8	IPI00497691.1	zgc:77235 Zgc:77235	7955	6
270	6.06	8.12	47.9	IPI00501609.2	gstt1b Glutathione S-transferase theta 1b	7955	5
271	6.06	6.13	12.4	IPI00865448.2	LOC564844 malate synthase-like	7955	3
272	6.06	6.06	42.5	IPI00513339.1	arf1l Uncharacterized protein	7955	3
273	6.05	7.28	13.9	IPI00481235.1	pdcd8 Pdcd8 protein	7955	4
274	6.05	6.05	27	IPI00500626.3	rpl13 60S ribosomal protein L13	7955	3
275	6.03	6.15	12.9	IPI00972117.1	ctrb1 Uncharacterized protein	7955	5
276	6.03	6.11	9.6	IPI00899969.3	LOC799598 Uncharacterized protein	7955	4
277	6.03	6.06	24.3	IPI00497421.1	tpm4 Tropomyosin 4	7955	3
278	6.01	6.01	7.6	IPI00494446.1	msna Uncharacterized protein	7955	3
279	6.01	6.01	17.8	IPI00607460.2	zgc:112210 Uncharacterized protein	7955	4
280	6	19.11	43	IPI00488901.1	tuba2 Uncharacterized protein	7955	18
281	6	6.08	12.4	IPI00993775.1	rpn2 Uncharacterized protein	7955	3
282	6	6.06	31.2	IPI00504978.1	park7 Protein DJ-1	7955	4
283	6	6.03	10.7	IPI00994892.1	acy3.2 Uncharacterized protein	7955	3
284	6	6.03	23	IPI00499892.1	rpl15 Ribosomal protein L15	7955	3
285	6	6.02	27.6	IPI00972631.1	upp1 Uncharacterized protein	7955	3
286	6	6.01	12.6	IPI01007540.1	LOC100536541;cs Citrate synthase	7955	3
287	6	6	29.7	IPI00897674.2	fdx1 Uncharacterized protein	7955	4
288	6	6	26.6	IPI00505523.2	ak2 Adenylate kinase 2, mitochondrial	7955	3
289	6	6	8.4	IPI00487971.3	gfpt1 Glutamine-fructose-6-phosphate transaminase 1	7955	4
290	6	6	30.6	IPI00483070.2	atp5o Uncharacterized protein	7955	3
291	6	6	12.7	IPI00501341.4	zgc:92502 Zgc:92502	7955	4
292	6	6	11	IPI00859782.2	LOC100000156 Uncharacterized protein	7955	3
293	6	6	16.7	IPI00511706.5	LOC100334830 kynureninase-like	7955	3
294	6	6	11.5	IPI00506729.3	actr3 ARP3 actin-related protein 3-like protein	7955	3
295	6	6	32.1	IPI00481155.2	rpl23 60S ribosomal protein L23	7955	4
296	6	6	31.1	IPI00505301.2	atp5l Uncharacterized protein	7955	3
297	5.8	5.81	14.2	IPI00505229.1	hsd17b10 Uncharacterized protein	7955	3
298	5.77	5.77	43	IPI00511345.2	cfl1 Uncharacterized protein	7955	5
299	5.75	5.8	15.3	IPI00975328.1	hdlbp Uncharacterized protein	7955	3
300	5.73	5.73	13.7	IPI00774469.1	zgc:136367 Zgc:136367	7955	3
301	5.7	5.85	17.8	IPI00835280.1	acadvl Acadvl protein	7955	4
302	5.64	5.64	24.1	IPI00491519.4	zgc:123327 Uncharacterized protein	7955	3
303	5.62	5.62	13.1	IPI00817732.1	psmc3 Uncharacterized protein	7955	3
304	5.59	5.61	21.1	IPI00507022.2	hprt1 Uncharacterized protein	7955	3
305	5.55	5.69	7.6	IPI00491239.3	npepps Uncharacterized protein	7955	3
306	5.46	5.47	10.4	IPI00616809.1	a1cf APOBEC1 complementation factor isoform 2	7955	4
307	5.36	5.36	8.5	IPI00510350.6	ogdh Uncharacterized protein	7955	3
308	5.31	5.34	18.6	IPI00786528.2	pter Phosphotriesterase-related protein	7955	4
309	5.3	8.79	23	IPI00868406.1	hadha Uncharacterized protein	7955	6
310	5.3	5.31	42	IPI00928852.1	rps24 40S ribosomal protein S24	7955	4
311	5.29	5.29	21.1	IPI00855614.1	qdpra Uncharacterized protein	7955	4
312	5.26	5.26	16.7	IPI00498960.3	dci Uncharacterized protein	7955	4
313	5.21	5.21	27.5	IPI00492905.1	rpl11 Uncharacterized protein	7955	4
314	5.19	5.27	11	IPI00510069.1	etfdh Zgc:92093	7955	3
315	5.09	5.09	22.4	IPI00492705.1	ephx1 Zgc:56126	7955	5
316	5.06	11.95	52	IPI00500460.1	ywhah tyrosine 3-monooxygenase/tryptophan 5-monooxygenase activation protein, gamma polypeptide	7955	12
317	5.05	5.05	19.4	IPI00859416.2	slc25a3 Solute carrier family 25 (Mitochondrial carrier	7955	3
318	5.01	5.03	10.8	IPI00497855.1	tcp1 T-complex protein 1 subunit alpha	7955	3
319	5	5	23.2	IPI00507062.1	ins Insulin	7955	3
320	4.95	5.07	16.9	IPI01006237.1	oat ornithine aminotransferase, mitochondrial-like isoform 1	7955	4
321	4.95	5.05	20.1	IPI00555330.1	cryz Crystallin, zeta	7955	3
322	4.95	4.95	28.7	IPI00490411.1	tpt1 Translationally-controlled tumor protein homolog	7955	4
323	4.93	4.95	21.8	IPI00496195.2	atp5f1 Uncharacterized protein	7955	4
324	4.85	5	18.9	IPI00501947.1	phb2 Uncharacterized protein	7955	4
325	4.82	4.82	30	IPI00508331.2	rps15a Uncharacterized protein	7955	3
326	4.76	4.78	28.9	IPI00493658.2	rps2 Uncharacterized protein	7955	3
327	4.73	10.07	40.9	IPI00932261.2	calr Calr protein	7955	10
328	4.7	4.81	11.7	IPI00507696.1	crata Zgc:92317	7955	3
329	4.6	4.6	28	IPI00855470.1	cmpk Uncharacterized protein	7955	3
330	4.52	4.52	23.5	IPI01024336.1	lgals2b Uncharacterized protein	7955	4
331	4.5	4.5	16.2	IPI00492829.6	rpl5b Uncharacterized protein	7955	4
332	4.49	4.49	9.8	IPI00488732.3	agxt2l1 Alanine--glyoxylate aminotransferase 2-like 1	7955	2
333	4.44	4.46	26.6	IPI00998762.1	- Histone H2A	7955	2
334	4.41	4.41	13.7	IPI00633223.2	selenbp1 Uncharacterized protein	7955	2
335	4.3	4.3	19.3	IPI00650155.2	rtn4a reticulon-4 isoform 4-l	7955	2
336	4.28	4.34	17.7	IPI00995128.1	akr1b1 Uncharacterized protein (Fragment)	7955	3
337	4.28	4.28	15.2	IPI00497482.1	zgc:77052 Zgc:77052	7955	3
338	4.27	4.27	37.1	IPI00492036.4	rps11 40S ribosomal protein s11	7955	2
339	4.26	4.3	12.5	IPI00505928.1	cct2 Chaperonin containing TCP1, subunit 2	7955	2
340	4.21	4.28	30.3	IPI00868462.1	zgc:171683 Zgc:171683 protein	7955	4
341	4.18	4.18	33.8	IPI00494738.1	rps13 Uncharacterized protein	7955	3
342	4.16	8.89	15.3	IPI00865727.4	dZ204D19.2;myh10 Uncharacterized protein	7955	6
343	4.16	4.23	10.4	IPI00901276.3	LOC100148818 cytosolic phospholipase A2 gamma-like	7955	3
344	4.15	4.15	23.6	IPI00493144.3	rps4x 40S ribosomal protein S4, X isoform	7955	3
345	4.13	4.13	46.7	IPI00618434.3	cyb5a Uncharacterized protein	7955	2
346	4.13	4.13	23.7	IPI00487430.1	rps9 ribosomal protein S9	7955	2
347	4.12	4.12	29.4	IPI00490551.3	rpl27 60S ribosomal protein L27	7955	2
348	4.1	4.1	22.9	IPI00499105.2	rpl24 60S ribosomal protein L24	7955	3
349	4.08	4.1	9.6	IPI00650880.2	ugt5c2 Zgc:153270	7955	3
350	4.08	4.08	24.4	IPI00851926.2	vdac3 Uncharacterized protein	7955	3
351	4.08	4.08	18.1	IPI00491568.3	rpl23a Ribosomal protein L23a	7955	2
352	4.08	4.08	26.5	IPI00503786.1	zgc:175066 Cirbp protein	7955	4
353	4.07	6.09	23.6	IPI00855302.1	cbr1 Uncharacterized protein	7955	6
354	4.07	4.07	11.3	IPI00485582.4	ncl Zgc:152810 protein	7955	2
355	4.06	37.42	49.1	IPI00809369.2	zgc:163069 ATP synthase subunit beta	7955	32
356	4.06	4.12	10.1	IPI00497153.3	sucla2 Uncharacterized protein	7955	3
357	4.06	4.08	18.3	IPI00509620.3	zgc:64031 Zgc:64031	7955	3
358	4.05	4.26	8	IPI00502046.4	cand1 Uncharacterized protein	7955	2
359	4.05	4.05	15.1	IPI00632292.1	rpl13a Uncharacterized protein	7955	3
360	4.04	4.06	16	IPI00994585.1	hsd11b3;LOC100006793 Uncharacterized protein	7955	2
361	4.04	4.04	54.6	IPI00507604.1	zgc:56493 Thioredoxin	7955	4
362	4.04	4.04	10	IPI00884637.1	ptmaa Ptmaa protein	7955	2
363	4.02	4.09	31.1	IPI00611053.1	pgam1b Phosphoglycerate mutase	7955	4
364	4.02	4.04	8.8	IPI00506519.3	cp Uncharacterized protein	7955	2
365	4.02	4.02	7.1	IPI00962003.2	dhtkd1 Uncharacterized protein	7955	2
366	4.02	4.02	19.9	IPI01024111.1	phyhd1 Uncharacterized protein	7955	4
367	4.01	6.18	17.8	IPI00489849.3	cbsb Cystathionine beta-synthase	7955	4
368	4.01	4.02	8.6	IPI00851389.4	LOC567822 Uncharacterized protein	7955	2
369	4.01	4.01	14.8	IPI00995056.1	psap Uncharacterized protein	7955	4
370	4.01	4.01	34.9	IPI00993262.1	zgc:92872 Ribosomal protein L18	7955	3
371	4.01	4.01	12.9	IPI00619557.5	ido1 Putative indoleamine 2,3-dioxygenase	7955	2
372	4.01	4.01	5.8	IPI00773172.3	slc2a2 Uncharacterized protein	7955	2
373	4.01	4.01	20.9	IPI00497458.2	zgc:112315 Glyoxalase domain-containing protein 5	7955	2
374	4	53.25	90.9	IPI00631256.1	hbaa1 Novel alpha-globin	7955	76
375	4	41.27	48.7	IPI00490182.3	glud1a Uncharacterized protein	7955	40
376	4	39.64	30.2	IPI00833472.2	pc Pc protein	7955	23
377	4	16.87	53.6	IPI01004772.1	LOC100538287 fumarylacetoacetase-like, partial	7955	12
378	4	4.23	6.6	IPI00612196.2	uba1 Ubiquitin-like modifier activating enzyme 1	7955	2
379	4	4.12	5.8	IPI00862577.2	LOC558044 Uncharacterized protein	7955	2
380	4	4.12	14.4	IPI00493991.10	zgc:101723 Trans-1,2-dihydrobenzene-1,2-diol dehydrogenase	7955	2
381	4	4.12	13.7	IPI01016711.1	afmid Uncharacterized protein	7955	2
382	4	4.1	7.7	IPI00494886.2	gbp1 Zgc:92185	7955	2
383	4	4.08	5.4	IPI00804142.2	iqgap2 Uncharacterized protein	7955	2
384	4	4.07	14.8	IPI00615919.1	pdip5 Protein disulfide isomerase-related protein	7955	2
385	4	4.07	9.3	IPI00510029.9	LOC566865 hypothetical LOC566865	7955	3
386	4	4.04	24.6	IPI00503058.4	pgrmc1 Uncharacterized protein	7955	3
387	4	4.04	13.2	IPI00997503.1	idh3a Uncharacterized protein (Fragment)	7955	2
388	4	4.04	11.8	IPI00855361.1	zgc:85777 Zgc:85777	7955	2
389	4	4.03	12.6	IPI00501589.4	uqcrc2 Ubiquinol-cytochrome c reductase core protein II	7955	3
390	4	4.03	12.1	IPI00504541.1	gatm Glycine amidinotransferase, mitochondrial	7955	2
391	4	4.03	17.8	IPI00994952.1	zgc:153867 Uncharacterized protein	7955	2
392	4	4.02	9.2	IPI00817843.1	zgc:154169 Zgc:154169	7955	2
393	4	4.02	12	IPI00615875.4	LOC558239 Uncharacterized protein	7955	2
394	4	4.01	6.7	IPI00829266.2	aldh16a1 Uncharacterized protein	7955	3
395	4	4	8.2	IPI00616233.5	aldh5a1 Uncharacterized protein	7955	2
396	4	4	12.7	IPI00502158.4	si:dkey-11e23.4 acyl-coenzyme A thioesterase 2, mitochondrial	7955	2
397	4	4	22.1	IPI00495374.3	rps15 Ribosomal protein S15	7955	2
398	4	4	17.1	IPI00494078.2	si:ch211-103n10.5 Uncharacterized protein	7955	2
399	4	4	5.6	IPI00482833.4	zgc:113006 Uncharacterized protein	7955	2
400	4	4	24.4	IPI00496910.4	si:ch73-131e21.5 Uncharacterized protein	7955	3
401	4	4	8.2	IPI00510085.2	ddx39a Ddx39a protein	7955	2
402	4	4	7.1	IPI00494904.4	acads Uncharacterized protein	7955	2
403	4	4	15.6	IPI00492127.2	eif2s2 Eukaryotic translation initiation factor 2, subunit 2 beta	7955	2
404	4	4	15.1	IPI00484770.1	psmb2 Proteasome subunit beta type	7955	2
405	4	4	8.2	IPI00861378.4	LOC100330415 6-phosphofructo-2-kinase/fructose-2,6-biphosphatase-like	7955	2
406	4	4	12	IPI00504070.1	zgc:92041 Zgc:92041	7955	2
407	4	4	16.1	IPI00498877.1	zgc:66350 Zgc:66350	7955	2
408	4	4	25.2	IPI00484752.2	uqcrb Uncharacterized protein	7955	2
409	4	4	4.5	IPI00933640.1	psmb5 Proteasome subunit beta type	7955	2
410	4	4	10.8	IPI00932138.2	esd Uncharacterized protein	7955	2
411	4	4	15.9	IPI00851335.1	isoc2 Uncharacterized protein	7955	3
412	4	4	11.6	IPI00504006.1	sara2 Uncharacterized protein	7955	2
413	4	4	8.3	IPI00500645.1	ssr1 Translocon-associated protein alpha	7955	2
414	3.96	4	3.3	IPI00484190.1	acox3 Acyl-coenzyme A oxidase	7955	2
415	3.89	10.62	36.7	IPI00501838.2	ywhaqb Uncharacterized protein	7955	11
416	3.83	3.9	16.9	IPI00499674.1	serpina7 Serpin peptidase inhibitor, clade A (Alpha-1 antiproteinase, antitrypsin), member 7	7955	2
417	3.74	3.87	12.7	IPI00495382.2	retsat Putative all-trans-retinol 13,14-reductase	7955	3
418	3.71	3.74	15.4	IPI00483355.1	zgc:77439 dimethylanaline monooxygenase-like	7955	2
419	3.69	3.69	11	IPI00492519.2	calua Calumenin-A	7955	2
420	3.65	3.67	8.5	IPI00496722.7	si:dkey-76k16.7 Uncharacterized protein	7955	2
421	3.64	3.64	33.6	IPI00492664.3	rps20 Uncharacterized protein	7955	2
422	3.56	3.56	17.2	IPI00482732.1	arhgdia Uncharacterized protein	7955	2
423	3.51	3.53	19.5	IPI00487665.1	cct3 Uncharacterized protein	7955	2
424	3.51	3.51	23.7	IPI00505092.1	ran GTP-binding nuclear protein Ran	7955	2
425	3.47	3.47	12.3	IPI00508674.1	dhrs1 Uncharacterized protein	7955	2
426	3.44	3.5	11.6	IPI00920601.2	naca nascent polypeptide-associated complex subunit alpha isoform 1	7955	3
427	3.39	3.41	6.1	IPI00997409.1	ugt2a1 UDP glucuronosyltransferase 2 family, polypeptide A1 precursor	7955	2
428	3.38	3.38	8.4	IPI00506794.2	arcn1l Uncharacterized protein	7955	2
429	3.37	3.37	16.9	IPI00817786.2	ivd Uncharacterized protein	7955	2
430	3.28	3.28	7.4	IPI00864573.1	psmd13 Uncharacterized protein	7955	2
431	3.27	3.27	12.9	IPI00497707.1	wdr1 WD repeat domain 1	7955	2
432	3.25	4.22	14.4	IPI00497049.2	zgc:162396 Zgc:162396 protein	7955	3
433	3.24	10.24	38.8	IPI00483518.2	ywhae1 14-3-3 protein epsilon	7955	13
434	3.22	12.16	46.1	IPI00509935.1	ywhabl Uncharacterized protein	7955	15
435	3.1	3.21	21.4	IPI00994473.1	pkm2a Pyruvate kinase	7955	4
436	3.1	3.1	36	IPI00484266.2	hspe1 Uncharacterized protein	7955	2
437	3.07	3.07	10.6	IPI00613451.8	zgc:162816 Uncharacterized protein	7955	2
438	3.04	3.04	19.2	IPI00911395.1	myl12.2 Uncharacterized protein	7955	3
439	2.97	2.99	9.2	IPI00972122.1	zgc:63480 NADPH--cytochrome P450 reductase (Fragment)	7955	2
440	2.97	2.97	13.6	IPI00758585.1	gmds Uncharacterized protein	7955	2
441	2.93	3.37	20.8	IPI00485245.3	zgc:110339 Zgc:110339	7955	3
442	2.91	2.91	29.3	IPI00962132.1	LOC100329422 histone H3.2-like	7955	2
443	2.81	2.83	12.9	IPI00497960.2	yars Tyrosyl-tRNA synthetase, cytoplasmic	7955	1
444	2.79	2.81	5.1	IPI01004578.1	abcb11b bile salt export pump isoform 1	7955	2
445	2.72	2.74	11.6	IPI00506005.3	psmd1 Proteasome (Prosome, macropain) 26S subunit, non-ATPase, 1	7955	4
446	2.7	2.75	8.2	IPI00484018.4	cyp4v2 Uncharacterized protein	7955	2
447	2.69	2.69	13.4	IPI00994133.1	LOC564107 Uncharacterized protein (Fragment)	7955	2
448	2.69	2.69	12.6	IPI00513129.2	shbg sex hormone binding globulin	7955	2
449	2.66	2.66	11.7	IPI00513317.1	nap1l1 Uncharacterized protein	7955	3
450	2.64	4.76	5	IPI00507382.1	zgc:92481 Zgc:92481	7955	3
451	2.64	2.64	16	IPI00772257.2	khdrbs1a Uncharacterized protein	7955	2
452	2.59	2.59	6.8	IPI00504031.1	zgc:100824 Diphosphomevalonate decarboxylase	7955	2
453	2.57	2.57	8.5	IPI00962364.1	LOC100330524 putative protein phosphatase 1 regulatory inhibitor subunit 3G-like	7955	2
454	2.54	2.54	8.1	IPI00760298.2	zgc:136493 Uncharacterized protein	7955	2
455	2.52	2.52	26.5	IPI00492852.1	rpl30 Uncharacterized protein	7955	2
456	2.51	5.77	14.8	IPI00513003.2	ezrl Uncharacterized protein	7955	4
457	2.43	2.49	8	IPI00505708.2	dpp3 Uncharacterized protein	7955	1
458	2.41	2.44	41.3	IPI00997054.2	ubb Zgc:172187 protein (Fragment)	7955	2
459	2.41	2.41	8.9	IPI00499957.3	zgc:92111 Organic solute transporter subunit alpha	7955	2
460	2.38	3.46	10.9	IPI00863382.1	zgc:174342 Zgc:174342 protein	7955	2
461	2.37	8.15	33.7	IPI00915641.1	dhrs11b Dehydrogenase/reductase (SDR family) member 11b	7955	8
462	2.37	2.38	27.4	IPI00810161.2	ptmab Prothymosin alpha-B	7955	1
463	2.36	2.4	9.9	IPI00489936.2	zgc:64106 Uncharacterized protein	7955	1
464	2.35	2.36	9	IPI00807067.2	mut Uncharacterized protein	7955	3
465	2.34	2.38	22.6	IPI00505170.3	rpl8 60S ribosomal protein L8	7955	2
466	2.34	2.35	20.8	IPI00513610.2	sult3st1 Uncharacterized protein	7955	1
467	2.34	2.34	10.4	IPI00923195.1	zgc:109981 probable thiopurine S-methyltransferase	7955	1
468	2.32	2.32	32.2	IPI00810517.2	prhoxnb 2-oxo-4-hydroxy-4-carboxy-5-ureidoimidazoline decarboxylase	7955	1
469	2.31	4.51	15.3	IPI00806987.3	zgc:153296 Zgc:153296	7955	4
470	2.31	2.31	11.7	IPI00505893.3	zgc:101540 Uncharacterized protein	7955	1
471	2.29	2.29	27	IPI00555459.2	nedd8 Neural cell expressed, developmentally down-regulated 8	7955	1
472	2.27	2.29	20.4	IPI00500296.3	ak4 Zgc:85790	7955	1
473	2.26	2.27	50	IPI00492713.1	si:ch211-239j9.2 cytochrome c oxidase polypeptide VIc-like	7955	3
474	2.24	2.24	8.1	IPI00770438.3	zgc:162977 Zgc:162977 protein	7955	1
475	2.24	2.24	17.1	IPI00500096.4	cryl1 Uncharacterized protein	7955	1
476	2.21	2.21	11	IPI01016741.1	serpina1 Serpina1 protein (Fragment)	7955	4
477	2.19	2.21	14.3	IPI00485171.4	tufm Elongation factor Tu	7955	1
478	2.18	46.76	93.2	IPI00554412.2	ba2;ba2l;ba1l;ba1 Hemoglobin subunit beta-2	7955	68
479	2.15	2.21	9.2	IPI00859390.5	zgc:171945 Uncharacterized protein	7955	2
480	2.15	2.15	10.7	IPI00618959.2	si:ch211-149g8.3 Oxysterol-binding protein	7955	1
481	2.15	2.15	29.5	IPI00505836.2	icn ictacalcin	7955	3
482	2.14	2.14	37.3	IPI00499132.2	pcbd1 Uncharacterized protein	7955	3
483	2.12	3.22	22.4	IPI00505391.2	anxa5b Anxa5b protein	7955	3
484	2.12	2.12	11	IPI00491304.4	cndp2 CNDP dipeptidase 2	7955	1
485	2.11	2.11	9.2	IPI00511230.2	psmd12 Proteasome (Prosome, macropain) 26S subunit, non-ATPase, 12	7955	2
486	2.1	2.13	20	IPI00508277.1	rpl35a Uncharacterized protein	7955	2
487	2.1	2.1	29.8	IPI00995237.1	- Uncharacterized protein	7955	1
488	2.09	2.1	9.6	IPI00854046.1	zgc:77778 Uncharacterized protein	7955	1
489	2.09	2.09	28.6	IPI00996558.1	rps26 Uncharacterized protein	7955	1
490	2.09	2.09	23.1	IPI00502862.1	rpl21 Uncharacterized protein	7955	1
491	2.09	2.09	19	IPI00483526.2	psmb1 Proteasome subunit beta type	7955	2
492	2.07	2.07	4.8	IPI00817490.2	cpt2 carnitine O-palmitoyltransferase 2, mitochondrial	7955	1
493	2.06	2.12	4.1	IPI00495942.3	copg2 Isoform 1 of Coatomer subunit gamma-2	7955	1
494	2.06	2.08	18.1	IPI00481232.2	cyp1a Cytochrome P450, family 1, subfamily A, polypeptide 1	7955	1
495	2.05	2.05	11.9	IPI00997130.1	anxa3b Uncharacterized protein	7955	1
496	2.04	3.06	7	IPI00509057.4	copa Coatomer protein complex subunit alpha	7955	2
497	2.04	2.05	7.1	IPI00503522.4	pdcd6ip Uncharacterized protein	7955	1
498	2.04	2.04	13	IPI00485604.4	zgc:162544 Uncharacterized protein	7955	2
499	2.03	2.14	4.8	IPI00829009.4	LOC100333590 Uncharacterized protein	7955	1
500	2.03	2.08	4	IPI00513559.4	abcc2 ATP-binding cassette, sub-family C (CFTR/MRP), member 2	7955	1
501	2.03	2.05	3.6	IPI00507818.1	iars Isoleucyl-tRNA synthetase	7955	1
502	2.03	2.03	3.8	IPI00971625.1	uso1 Uncharacterized protein	7955	1
503	2.03	2.03	12.4	IPI00485904.1	gcdhl Glutaryl-Coenzyme A dehydrogenase, like	7955	3
504	2.03	2.03	17.9	IPI00931488.1	zgc:85789 Ester hydrolase C11orf54 homolog	7955	1
505	2.03	2.03	7	IPI00612423.4	LOC555902 Uncharacterized protein	7955	2
506	2.02	13.71	27	IPI00491820.2	hsp90a.2 Uncharacterized protein	7955	20
507	2.02	4.17	4.6	IPI00506379.6	kpnb3 Uncharacterized protein	7955	2
508	2.02	2.09	13	IPI00503916.1	rac1 Uncharacterized protein	7955	1
509	2.02	2.06	8.7	IPI01024198.1	si:dkey-28b4.8 Uncharacterized protein	7955	1
510	2.02	2.05	9.4	IPI00496254.3	sult3st2 Uncharacterized protein	7955	1
511	2.02	2.02	10.4	IPI00844973.1	hal Histidine ammonia-lyase	7955	1
512	2.02	2.02	9.4	IPI00497243.3	zgc:65788 Zgc:65788	7955	1
513	2.02	2.02	12.6	IPI00513087.1	zgc:92453 Zgc:92453	7955	1
514	2.02	2.02	6.6	IPI00758772.1	zgc:136439 Si:busm1-211o13.10	7955	2
515	2.02	2.02	24	IPI00507457.1	nhp2 H/ACA ribonucleoprotein complex subunit 2-like protein	7955	1
516	2.01	7.95	25.2	IPI00510383.1	pls3 Uncharacterized protein	7955	7
517	2.01	4.01	12.4	IPI00487122.1	cct4 T-complex protein 1 subunit delta	7955	2
518	2.01	2.1	8.2	IPI00490675.3	lta4h Uncharacterized protein	7955	1
519	2.01	2.07	6.1	IPI00804188.3	LOC100006023 Uncharacterized protein	7955	1
520	2.01	2.03	9.4	IPI00996107.1	slco1d1 74 kDa protein	7955	1
521	2.01	2.03	38.2	IPI00551848.2	LOC402883 ATP synthase subunit f, mitochondrial isoform 1	7955	1
522	2.01	2.02	3	IPI00933140.1	plxnb2a Plexin B2	7955	1
523	2.01	2.01	15.1	IPI00489186.5	si:dkeyp-68f9.9 Uncharacterized protein	7955	1
524	2.01	2.01	17.4	IPI00496595.1	aspdh Putative L-aspartate dehydrogenase	7955	2
525	2.01	2.01	6.6	IPI00817331.4	si:ch211-283h6.6 Uncharacterized protein	7955	1
526	2.01	2.01	19.2	IPI00487987.1	rps14 Uncharacterized protein	7955	2
527	2	10.97	30.2	IPI00487455.3	gapdhs Glyceraldehyde 3-phosphate dehydrogenase, testis-specific	7955	7
528	2	10.56	40.8	IPI00503481.1	ywhaqa Uncharacterized protein	7955	11
529	2	6.96	28.8	IPI00512269.3	ldha L-lactate dehydrogenase A chain	7955	7
530	2	6.05	27.6	IPI00656470.2	zgc:123307 Peptidyl-prolyl cis-trans isomerase	7955	4
531	2	3.09	13.7	IPI00861182.2	aldh9a1b Aldehyde dehydrogenase family 9 member A1-B	7955	2
532	2	2.98	10.2	IPI00506875.2	dfna5 Uncharacterized protein	7955	2
533	2	2.98	6.6	IPI00998116.1	zgc:73311 Uncharacterized protein (Fragment)	7955	2
534	2	2.31	9	IPI00494833.1	zgc:73107 Zgc:73107	7955	2
535	2	2.12	4.6	IPI00650299.1	paics Uncharacterized protein	7955	1
536	2	2.11	6.7	IPI00618707.6	flnbl filamin-B, partial	7955	1
537	2	2.11	2.8	IPI00931537.2	cad Carbamoyl-phosphate synthetase 2, aspartate transcarbamylase, and dihydroorotase	7955	1
538	2	2.1	6.8	IPI00485280.2	pabpc1a Poly A binding protein, cytoplasmic 1 a	7955	1
539	2	2.09	7.9	IPI00758877.1	zgc:109868 Zgc:109868	7955	1
540	2	2.09	16	IPI00871008.1	zgc:174895 Zgc:174895 protein	7955	1
541	2	2.09	9.4	IPI00495619.3	khk Ketohexokinase	7955	1
542	2	2.08	8.7	IPI00742485.2	zgc:136866 Uncharacterized protein	7955	1
543	2	2.07	20.9	IPI00509650.3	cct7 Cct7 protein (Fragment)	7955	1
544	2	2.07	11.4	IPI00502441.3	zgc:112407 Tetratricopeptide repeat protein 38	7955	1
545	2	2.07	5.2	IPI00803402.1	zgc:154041 Elongation factor G, mitochondrial	7955	1
546	2	2.07	8.8	IPI00829307.2	acss1 acyl-CoA synthetase short-chain family member 1	7955	1
547	2	2.07	29.2	IPI00508000.1	dynll1 Uncharacterized protein	7955	1
548	2	2.07	6.3	IPI00488445.5	irgf1 Uncharacterized protein	7955	1
549	2	2.06	8	IPI00992993.1	ces3 Uncharacterized protein (Fragment)	7955	1
550	2	2.06	4.8	IPI00960790.2	cfi complement factor I	7955	1
551	2	2.06	6.9	IPI00489288.2	atp6v1b2 Uncharacterized protein	7955	1
552	2	2.06	4	IPI00963454.1	ganab neutral alpha-glucosidase AB-like	7955	1
553	2	2.06	6.6	IPI00876762.2	rpz5 Rapunzel5	7955	1
554	2	2.05	11.6	IPI00618655.6	si:ch211-133j6.3 Uncharacterized protein	7955	1
555	2	2.05	13.8	IPI00928677.1	hmgb2 Uncharacterized protein	7955	1
556	2	2.04	15.2	IPI00770460.1	actr1 Zgc:56317 protein	7955	1
557	2	2.04	8.5	IPI00481549.2	ppm1ba Uncharacterized protein	7955	1
558	2	2.04	5.7	IPI00503338.1	canx Zgc:63524	7955	1
559	2	2.03	7.7	IPI00482211.4	si:dkey-276i5.1 glycyl-tRNA synthetase	7955	1
560	2	2.03	10.6	IPI00501258.2	zgc:77126 Zgc:77126	7955	1
561	2	2.03	14.5	IPI00512109.1	anxa2a Uncharacterized protein	7955	1
562	2	2.03	14.6	IPI00510462.2	pdap1 Pdgfa associated protein 1	7955	1
563	2	2.02	9.9	IPI00504625.2	syncrip Uncharacterized protein	7955	1
564	2	2.02	6.8	IPI00490510.7	lars Uncharacterized protein (Fragment)	7955	1
565	2	2.02	9	IPI00501402.3	atic Uncharacterized protein	7955	1
566	2	2.02	14.1	IPI00758797.1	gmpr2;zgc:136869 GMP reductase	7955	1
567	2	2.02	15	IPI00993026.1	fau Uncharacterized protein	7955	1
568	2	2.02	12.5	IPI00509392.1	pdcd5 Uncharacterized protein	7955	1
569	2	2.02	3	IPI01024533.1	zgc:172295 Uncharacterized protein	7955	1
570	2	2.01	6.9	IPI01023858.1	zgc:152945 Uncharacterized protein	7955	1
571	2	2.01	2.8	IPI00503357.6	wu:fc76b04 Uncharacterized protein	7955	1
572	2	2.01	2.5	IPI00501062.1	ipo7 Uncharacterized protein	7955	1
573	2	2.01	9.5	IPI00498033.3	setb Myeloid leukemia-associated SET translocation protein	7955	1
574	2	2.01	17	IPI00919969.1	bdh2 19 kDa protein	7955	1
575	2	2.01	6.1	IPI00919450.2	sept2 Uncharacterized protein (Fragment)	7955	1
576	2	2.01	4.6	IPI00834420.2	cpb1 Uncharacterized protein	7955	1
577	2	2.01	7.5	IPI00509069.3	mtap Uncharacterized protein	7955	1
578	2	2.01	12.8	IPI00501378.1	rpl19 60S ribosomal protein L19	7955	1
579	2	2.01	7.6	IPI00488768.1	cnn3a Uncharacterized protein	7955	1
580	2	2.01	8.3	IPI00882876.1	zgc:172082 Zgc:172082 protein	7955	1
581	2	2.01	8.2	IPI00508268.1	pnp4b Zgc:77825	7955	1
582	2	2	9.1	IPI00483313.3	prps1b ribose-phosphate pyrophosphokinase 1	7955	1
583	2	2	9.1	IPI00481285.3	eif4a3 Eukaryotic initiation factor 4A-III	7955	2
584	2	2	18.3	IPI00505260.3	cox4i1 Cytochrome c oxidase subunit IV isoform 1	7955	1
585	2	2	5.7	IPI00484500.4	atp6v1al Uncharacterized protein	7955	1
586	2	2	7.1	IPI00933096.1	sccpdha Uncharacterized protein	7955	1
587	2	2	9.1	IPI00836352.3	lman1 protein ERGIC-53	7955	1
588	2	2	11.4	IPI00634891.3	as3mt Uncharacterized protein	7955	3
589	2	2	5.2	IPI00512690.2	stip1 Uncharacterized protein	7955	2
590	2	2	7.7	IPI00505502.2	gcdh Uncharacterized protein	7955	2
591	2	2	5.7	IPI00493829.1	zgc:64119 Zgc:64119	7955	1
592	2	2	6.5	IPI00972015.1	zgc:174637 Uncharacterized protein	7955	1
593	2	2	41.9	IPI00962996.1	LOC100333064 cytochrome b-c1 complex subunit 9-like isoform 1	7955	1
594	2	2	4	IPI00882913.3	wu:fb17g07 hypothetical protein LOC797705	7955	1
595	2	2	16	IPI00636975.2	apoc2 Uncharacterized protein	7955	1
596	2	2	6.1	IPI00512536.2	etf1 Uncharacterized protein	7955	1
597	2	2	11.8	IPI00507989.1	zgc:85680 Zgc:85680	7955	1
598	2	2	5	IPI00482453.1	rad23b RAD23 homolog B	7955	1
599	2	2	4.3	IPI01016907.1	fads2 Uncharacterized protein	7955	1
600	2	2	4.3	IPI01007321.1	flna filamin-A-like, partial	7955	1
601	2	2	5.2	IPI00998150.1	slc25a42 Uncharacterized protein	7955	1
602	2	2	5.3	IPI00934254.2	adhfe1 Uncharacterized protein	7955	1
603	2	2	30	IPI00920489.1	zgc:153177 Uncharacterized protein	7955	1
604	2	2	11.3	IPI00861611.1	arpc4;arpc4l Uncharacterized protein	7955	1
605	2	2	9.7	IPI00817954.1	ela3l Uncharacterized protein	7955	2
606	2	2	9.6	IPI00817727.1	psma5 Proteasome subunit alpha type	7955	1
607	2	2	8.7	IPI00758980.1	atp1b1a ATPase, Na+\/K+ transporting, beta 1a polypeptide	7955	1
608	2	2	12.5	IPI00508844.1	rpl9 Uncharacterized protein	7955	1
609	2	2	11	IPI00508542.1	zgc:86898 Zgc:86898	7955	1
610	2	2	7.4	IPI00500404.3	si:dkey-98p3.7 Uncharacterized protein	7955	1
611	2	2	21.7	IPI00496157.2	cox7a2 Cytochrome c oxidase, subunit VIIa 2	7955	1
612	2	2	9.4	IPI00488785.3	rpl36a 60S ribosomal protein L36a	7955	1
613	2	2	16.2	IPI00482801.2	sec11a Uncharacterized protein	7955	1
614	2	2	4.3	IPI01023519.1	- Uncharacterized protein	7955	1
615	2	2	15	IPI00996689.1	zgc:158409 Uncharacterized protein	7955	1
616	2	2	18.1	IPI00931988.1	glrx Glrx protein	7955	1
617	2	2	7.4	IPI00931837.1	nudt5 Uncharacterized protein	7955	1
618	2	2	8.5	IPI00919449.1	ssr3 Uncharacterized protein	7955	1
619	2	2	9.8	IPI00876722.1	zgc:153978 Zgc:153978 protein	7955	1
620	2	2	13.1	IPI00759097.1	zgc:136826 Ribosomal protein S27	7955	1
621	2	2	5.7	IPI00508372.1	vapa VAMP (Vesicle-associated membrane protein)-associated protein A	7955	1
622	2	2	17.4	IPI00503732.2	rps28 40S ribosomal protein S28	7955	1
623	2	2	23.5	IPI00492842.1	gng7 Uncharacterized protein	7955	1
624	2	2	7.7	IPI00487704.2	zgc:92590 Zgc:92590	7955	1
625	2	2	6.3	IPI00486525.5	sod2 Superoxide dismutase	7955	1
626	2	2	12.2	IPI00483018.1	LOC100330344;ndufa4l NADH dehydrogenase (Ubiquinone) 1 alpha subcomplex 4, like	7955	1
627	2	2	12.2	IPI00482339.1	cisd1;si:dkey-18n13.4 Zgc:63561	7955	1
628	1.96	2.01	3.8	IPI00554382.4	lipf Uncharacterized protein	7955	1
629	1.96	2	5.5	IPI00495890.1	serpinb1 Uncharacterized protein	7955	1
630	1.96	2	11.1	IPI00490053.1	zgc:103764 histidine triad nucleotide-binding protein 1	7955	1
631	1.89	2.04	10.9	IPI00486130.2	rpl28l Rpl28l protein	7955	1
632	1.88	1.88	16.1	IPI00503659.3	ndufs3 NADH dehydrogenase (Ubiquinone) Fe-S protein 3	7955	1
633	1.86	2.03	9	IPI00483521.5	gspt1l Uncharacterized protein	7955	1
634	1.85	2.1	5.1	IPI00995291.1	LOC567310 Uncharacterized protein	7955	1
635	1.85	1.86	6.4	IPI00500537.1	anp32e Acidic leucine-rich nuclear phosphoprotein 32 family member E	7955	1
636	1.85	1.85	13.8	IPI00829178.1	zgc:158363 Zgc:158363	7955	1
637	1.83	1.85	6.6	IPI00487216.1	hspa4a Uncharacterized protein	7955	1
638	1.82	1.84	43.1	IPI00923296.1	atp5j ATP synthase-coupling factor 6, mitochondrial	7955	3
639	1.72	1.74	7.9	IPI00481117.3	mtdha Uncharacterized protein	7955	1
640	1.69	1.69	8.3	IPI00504913.2	pdia2 Uncharacterized protein	7955	1
641	1.68	1.68	9.6	IPI00834927.1	zgc:56585 Zgc:56585 protein	7955	1
642	1.68	1.68	11.9	IPI00963069.2	LOC100331639 Uncharacterized protein	7955	2
643	1.66	1.66	9.8	IPI00501108.1	skp1 Uncharacterized protein	7955	1
644	1.64	2.82	8.5	IPI00809541.1	dars Zgc:154056	7955	2
645	1.62	1.63	6.9	IPI00509542.2	psma4 Proteasome subunit alpha type	7955	1
646	1.61	1.62	11.6	IPI00972276.1	c9 Uncharacterized protein	7955	1
647	1.6	1.61	5.7	IPI00859805.3	pccb Uncharacterized protein	7955	1
648	1.59	1.7	3.3	IPI00932089.2	mll3b Uncharacterized protein	7955	1
649	1.51	1.51	9.4	IPI00486324.1	ndufa6 NADH dehydrogenase [ubiquinone] 1 alpha subcomplex subunit 6	7955	1
650	1.5	1.51	12	IPI00482591.1	aclya ATP citrate lyase	7955	2
651	1.5	1.51	7.2	IPI00484719.1	eif5 Uncharacterized protein	7955	1
652	1.47	1.48	23.1	IPI00490915.3	mb Myoglobin	7955	1
653	1.47	1.47	11.6	IPI00502871.1	zgc:73293 Zgc:73293	7955	1
654	1.46	1.46	10.2	IPI00774300.4	rtn3;LOC100538268 Uncharacterized protein	7955	1
655	1.44	1.46	11.1	IPI00832322.1	LOC798092 vimentin-like	7955	1
656	1.42	1.47	14.4	IPI00509360.2	rps12 40S ribosomal protein S12	7955	1
657	1.37	1.39	19.7	IPI00493786.3	nit2 Uncharacterized protein	7955	1
658	1.36	1.36	5	IPI00497193.3	slc16a1 Uncharacterized protein	7955	1
659	1.33	1.33	5.4	IPI00972305.1	qars Uncharacterized protein	7955	1
