# Supplementary material for: Dramatic Improvement of Proteomic Analysis of Zebrafish Liver Tumor by Effective Protein Extraction with Sodium Deoxycholate and Heat Denaturation
Source: Int J Anal Chem. 2015 Mar 19;2015:763969. doi: 10.1155/2015/763969 (PMC4383156; doi:10.1155/2015/763969)
Supplement: Supplementary file 1 — The Supplementary material contains our identified protein list from our 1D shotgun analysis for both DOCΔX (Supplementary Table 1) and SDSΔX (Supplementary Table 2) samples. Supplementary Table 3 contains our identified protein list from our 2D shotgun analysis for DOCΔX sample. Supplementary Table 4 contains the list of representative “canonical pathways” and “diseases and biological functions” with the respective proteins from our identified protein list from Supplementary Table 3 that we obtained from our pathway analysis using IPA. Supplementary Data 1 contains the chromatograms from our 1D (both DOCΔX and SDSΔX) and 2D shotgun analysis (DOCΔX). [file 763969.f1.zip › Supplementary_Table_2.xls]

## Sheet: Sheet1
N	Unused	Total	% Cov	Accession #	Name	Species	Peptides(95%)
1	90.09	90.09	52.9	IPI00931821.2	zgc:123047 Uncharacterized protein	7955	62
2	80.99	80.99	77.1	IPI00483853.1	glud1b glutamate dehydrogenase 1b	7955	86
3	80.05	80.63	60.3	IPI00993204.1	aldh1l1 Uncharacterized protein	7955	46
4	65.12	65.57	55	IPI01024186.1	pygl Phosphorylase	7955	48
5	63.39	63.39	85.8	IPI01016814.1	bhmt Uncharacterized protein	7955	63
6	61.73	61.73	75.4	IPI00996298.1	aldob Fructose-bisphosphate aldolase	7955	88
7	60.65	60.65	87.4	IPI00497753.5	gapdh Glyceraldehyde-3-phosphate dehydrogenase	7955	69
8	60.46	62.74	73.3	IPI00920751.1	aldh2b Mitochondrial aldehyde dehydrogenase 2b	7955	51
9	60.1	60.31	86.4	IPI00490877.3	eno3 beta-enolase	7955	60
10	59.38	59.38	65	IPI00486027.1	krt8 Keratin, type II cytoskeletal 8	7955	47
11	57.84	57.84	76.6	IPI00996621.1	cat Catalase	7955	46
12	57.16	57.16	65.7	IPI00497325.2	pck2 Zgc:77867	7955	56
13	55.32	55.32	79.4	IPI00505489.1	zgc:56326 4-hydroxyphenylpyruvate dioxygenase	7955	40
14	54.04	54.04	66.5	IPI00494371.3	krt18 Keratin, type I cytoskeletal 18	7955	35
15	50.72	50.72	70.7	IPI00897805.2	zgc:111961 ATP synthase subunit beta	7955	46
16	50.62	50.62	29.1	IPI00486876.4	agl amylo-1, 6-glucosidase, 4-alpha-glucanotransferase	7955	28
17	50.36	50.9	65.2	IPI00491975.2	atp5a1 ATP synthase subunit alpha	7955	35
18	49.4	49.62	65.9	IPI00490006.2	bactin2 Actin, cytoplasmic 2	7955	58
19	49.28	49.42	69.6	IPI00508003.2	hspd1 Uncharacterized protein	7955	29
20	48.53	48.78	23.8	IPI00851793.5	si:ch211-93f2.1 Uncharacterized protein	7955	32
21	46.96	48.68	62.8	IPI00972722.3	tfa Transferrin	7955	32
22	46.52	46.68	64.9	IPI00512240.1	ef1a Elongation factor 1-alpha	7955	45
23	46.38	46.38	58.1	IPI00487440.1	aldh4a1 Delta-1-pyrroline-5-carboxylate dehydrogenase, mitochondrial	7955	33
24	46	46.34	46	IPI00934288.1	mthfd1 Methylenetetrahydrofolate dehydrogenase	7955	24
25	44.16	45.02	19	IPI00865996.2	spna2 Alpha II-spectrin	7955	23
26	44.16	44.16	74.5	IPI00506482.3	fbp1b Uncharacterized protein	7955	43
27	44.05	44.05	48.8	IPI00932942.1	hspa8 HSC70 protein	7955	28
28	42.43	42.54	42.1	IPI00511483.1	eef2b Uncharacterized protein	7955	27
29	41.21	41.46	53.6	IPI00506192.2	ahcy Adenosylhomocysteinase	7955	37
30	40.8	40.92	43	IPI00506057.1	hsp90b1 Uncharacterized protein	7955	23
31	40.21	40.27	77.7	IPI00510828.2	mat1a S-adenosylmethionine synthase	7955	31
32	39.26	39.26	69.5	IPI00852151.1	grhprb Uncharacterized protein	7955	40
33	39.16	39.43	52.8	IPI00487988.2	pklr Pyruvate kinase	7955	26
34	38.86	39.11	63.3	IPI00632486.4	pgm1 Phosphoglucomutase 1	7955	29
35	38.3	38.44	58.8	IPI00481049.1	acat1 Acetyl-CoA acetyltransferase, mitochondrial	7955	25
36	37.05	37.16	62.6	IPI00489722.3	adh8a Alcohol dehydrogenase 8a	7955	44
37	36.95	36.95	67.4	IPI00508365.2	pgk1 Phosphoglycerate kinase	7955	24
38	36.67	36.67	62.1	IPI00512371.1	aldh6a1 methylmalonate-semialdehyde dehydrogenase [acylating], mitochondrial	7955	28
39	36.41	36.41	54.9	IPI00773405.3	oxct1b Uncharacterized protein	7955	37
40	35.89	36.5	35.3	IPI00851389.4	LOC567822 Uncharacterized protein	7955	19
41	35.82	35.82	58.1	IPI00489732.4	suclg2 Uncharacterized protein	7955	22
42	35.73	35.73	66.7	IPI00502437.4	agxtb Uncharacterized protein	7955	31
43	35.42	35.42	69.2	IPI00508477.1	ldhbb L-lactate dehydrogenase B-B chain	7955	22
44	35.32	35.44	67.6	IPI00495830.1	apoa1 Apolipoprotein A-I	7955	25
45	35.17	35.17	58	IPI00994921.1	shmt1 Serine hydroxymethyltransferase	7955	24
46	35.01	35.43	43.6	IPI00801488.4	zgc:158138 Zgc:158138 protein	7955	21
47	34.93	35.4	57.4	IPI00491168.3	LOC555748 Uncharacterized protein	7955	22
48	34.82	37.08	63.7	IPI00495240.1	mdh1a Malate dehydrogenase	7955	33
49	34.74	34.74	54.2	IPI00497986.2	p4hb protein disulfide-isomerase	7955	23
50	33.83	33.95	43.1	IPI01016831.1	acsf2 acyl-CoA synthetase family member 2, mitochondrial precursor	7955	24
51	33.51	33.61	70	IPI00994508.1	- Uncharacterized protein	7955	33
52	33.3	33.55	35.9	IPI00502639.1	dpyd Dihydropyrimidine dehydrogenase [NADP+]	7955	21
53	32.75	32.96	58.5	IPI00932564.2	idh1 Isocitrate dehydrogenase	7955	22
54	32.25	32.25	91.2	IPI00493081.3	ba2;ba2l;ba1l;ba1 Hemoglobin subunit beta-1	7955	70
55	31.5	32.13	58.7	IPI00504274.1	hgd Uncharacterized protein	7955	25
56	31.42	31.51	77.6	IPI00512573.1	prdx6 Uncharacterized protein	7955	19
57	30.51	30.79	93.2	IPI00499748.5	gpx1a glutathione peroxidase 1	7955	26
58	30.41	30.41	67.6	IPI00637094.3	LOC792474;anxa4 Uncharacterized protein	7955	20
59	30.26	30.36	57.7	IPI00509533.6	pdia3 protein disulfide isomerase family A, member 3	7955	17
60	30.13	30.36	94.4	IPI00496071.2	fabp10a Fatty acid-binding protein 10-A, liver basic	7955	74
61	29.95	30.29	56.2	IPI00934329.1	tubb2c Tubulin, beta, 2	7955	27
62	29.85	29.96	53	IPI00494543.2	hsdl2 Hydroxysteroid dehydrogenase-like protein 2	7955	18
63	29.77	30.51	65	IPI00511623.2	got2a Aspartate aminotransferase	7955	25
64	29.56	29.78	53.1	IPI00498510.1	tkt transketolase-like protein 2	7955	17
65	29.45	29.45	40.1	IPI01016955.1	zgc:63647 Novel protein similar to vertbrate ormiminotransferase cyclodeaminase (Fragment)	7955	17
66	28.95	28.95	27.5	IPI00508338.1	actn4 Actn4	7955	16
67	28.33	28.71	58.7	IPI00492110.2	slc25a5 Uncharacterized protein	7955	19
68	27.92	38.76	52.2	IPI00505750.3	hspa5 Uncharacterized protein	7955	30
69	27.44	27.44	58.1	IPI00494761.3	fah Fumarylacetoacetate hydrolase	7955	18
70	26.91	26.91	79	IPI00971849.1	hbaa1 Uncharacterized protein	7955	59
71	26.61	26.97	33.2	IPI00511660.7	dmgdh dimethylglycine dehydrogenase, mitochondrial	7955	18
72	26.25	27.75	63.3	IPI00506249.4	ckba Zgc:154095	7955	18
73	26.24	26.55	16	IPI00963174.1	si:dkey-76b14.4 Uncharacterized protein	7955	16
74	26.17	26.47	20.1	IPI00929039.3	myh9l1 myosin-9, partial	7955	17
75	26.12	28.34	60.2	IPI00500184.3	acaa2 Zgc:56036	7955	23
76	25.73	25.81	47.9	IPI00487495.4	pah Phenylalanine hydroxylase	7955	15
77	25.51	26	72.9	IPI00613983.2	LOC100333437 Histone H2B	7955	31
78	25.35	25.45	47	IPI00554392.3	acadm Uncharacterized protein	7955	16
79	25.06	25.21	47.6	IPI00955573.1	gcat 2-amino-3-ketobutyrate coenzyme A ligase, mitochondrial	7955	16
80	24.89	24.89	69.7	IPI00502668.2	gstp1 glutathione S-transferase pi	7955	22
81	24.58	24.67	66.5	IPI00512157.1	zgc:64133 Malate dehydrogenase	7955	18
82	24.45	24.51	43.5	IPI00817143.2	gpt2l Isoform 1 of Alanine aminotransferase 2-like	7955	15
83	23.93	24	66.5	IPI00628282.3	gstt1a Uncharacterized protein	7955	29
84	23.75	23.76	45.3	IPI00995610.1	gpd1b Uncharacterized protein	7955	13
85	23.48	24.12	30.3	IPI00483375.2	aldh7a1 Uncharacterized protein	7955	14
86	23.34	23.4	27	IPI01023991.1	aco2 Uncharacterized protein	7955	12
87	22.91	22.98	45.9	IPI01018500.1	tuba8l4 Uncharacterized protein	7955	18
88	22.51	22.61	68.5	IPI00482908.3	prdx2 Uncharacterized protein	7955	17
89	22.29	22.41	73	IPI00484161.2	tpi1b Triosephosphate isomerase B	7955	20
90	22.23	22.23	44	IPI00507561.3	agmat Zgc:153353	7955	13
91	21.99	21.99	82.5	IPI00490809.1	sod1 Superoxide dismutase [Cu-Zn]	7955	20
92	21.6	21.67	52.4	IPI00484255.3	acaa1 Uncharacterized protein	7955	14
93	21.24	23.14	33.1	IPI00506014.4	hspa9 Heat shock protein 9	7955	14
94	21.18	21.18	52.9	IPI01024243.1	rplp0 Uncharacterized protein	7955	12
95	21.07	21.26	48.2	IPI00512800.1	ndrg1 Uncharacterized protein	7955	15
96	20.92	21.01	70.6	IPI00497681.2	zgc:92630 Uncharacterized protein	7955	14
97	20.74	20.74	32.1	IPI00491587.2	pgd 6-phosphogluconate dehydrogenase, decarboxylating	7955	13
98	20.29	20.44	17.9	IPI00512912.2	cltca clathrin, heavy polypeptide a	7955	10
99	20.29	20.29	36.8	IPI00516121.1	ephx2 Epoxide hydrolase 2, cytoplasmic	7955	11
100	20.06	20.48	34.7	IPI00507539.2	aldh9a1a Aldehyde dehydrogenase family 9 member A1-A	7955	15
101	20.06	20.21	57.8	IPI00507846.1	gnmt Glycine N-methyltransferase	7955	17
102	20.03	20.03	52	IPI00495740.1	uox Uricase	7955	11
103	19.95	20.14	23.9	IPI00481475.5	sardh Uncharacterized protein	7955	10
104	19.44	24.2	59.6	IPI00497275.1	agxta Alanine-glyoxylate aminotransferase, like	7955	19
105	19.31	19.31	24.2	IPI00505091.2	vcp Transitional endoplasmic reticulum ATPase	7955	10
106	19.17	19.31	27.9	IPI00493820.2	snd1 Uncharacterized protein	7955	15
107	18.91	18.91	58.4	IPI00851926.2	vdac3 Uncharacterized protein	7955	12
108	18.86	19.04	68	IPI00871032.1	hist1h4l Histone H4	7955	20
109	18.81	18.82	37.7	IPI00498442.1	gdi2 Uncharacterized protein	7955	10
110	18.72	20.98	88	IPI00491514.1	fabp3 Uncharacterized protein	7955	16
111	18.72	18.72	63.5	IPI00482761.2	gstm Uncharacterized protein	7955	12
112	18.45	18.45	48.6	IPI00635755.1	acat2 Uncharacterized protein	7955	13
113	18.41	18.48	64.6	IPI00499224.2	zgc:162356 Uncharacterized protein	7955	25
114	18.2	18.26	19.6	IPI00618299.5	LOC559212 1,4-alpha-glucan-branching enzyme-like	7955	11
115	18.09	18.21	34.3	IPI00504336.2	adka Uncharacterized protein	7955	9
116	18	18.3	50.8	IPI00993110.1	etfa Uncharacterized protein	7955	11
117	17.87	20	21.4	IPI00995843.1	hsp90ab1 Uncharacterized protein	7955	11
118	17.87	18	46	IPI00484825.2	akr1a1a Alcohol dehydrogenase [NADP+] A	7955	10
119	17.81	17.82	30.8	IPI00510383.1	pls3 Uncharacterized protein	7955	10
120	17.62	17.78	49.2	IPI00498898.1	ywhabb 14-3-3 protein beta/alpha-B	7955	15
121	17.58	17.8	80.9	IPI00503480.4	zgc:193613 Zgc:193613	7955	16
122	17.54	19.55	42.9	IPI00511127.4	zgc:153629 Zgc:153629	7955	12
123	17.12	17.31	17.6	IPI00496722.7	si:dkey-76k16.7 Uncharacterized protein	7955	9
124	17.07	17.23	38.5	IPI00496195.2	atp5f1 Uncharacterized protein	7955	9
125	16.98	16.98	51.6	IPI00509740.1	zgc:103585 3-hydroxyanthranilate 3,4-dioxygenase	7955	11
126	16.79	16.85	49.8	IPI00932261.2	calr Calr protein	7955	9
127	16.38	16.38	58.6	IPI00513166.1	rgn Regucalcin	7955	16
128	16.3	16.3	71.3	IPI00497774.1	ppial Peptidyl-prolyl cis-trans isomerase	7955	11
129	16.21	16.75	16.6	IPI00505730.2	atp1a1 ATPase, Na+/K+ transporting, alpha 1 polypeptide	7955	9
130	16.08	16.08	36.7	IPI00505507.4	upb1 Ureidopropionase, beta	7955	9
131	16	16.29	21.5	IPI00993183.1	me1 Malic enzyme	7955	8
132	16	16.13	71.9	IPI00501400.1	zgc:92739 heat-responsive protein 12-like isoform 1	7955	12
133	16	16.01	29.4	IPI00863600.2	agxt2 Zgc:114195	7955	9
134	16	16	59.3	IPI00483070.2	atp5o Uncharacterized protein	7955	9
135	16	16	33.3	IPI00614265.1	zgc:92869 Zgc:113898	7955	9
136	15.82	16.4	51.6	IPI00508284.1	rpsa 40S ribosomal protein SA	7955	8
137	15.77	15.77	10.8	IPI00510350.6	ogdh Uncharacterized protein	7955	8
138	15.42	15.48	41.1	IPI00487456.4	gpia Glucose-6-phosphate isomerase	7955	11
139	15.32	15.39	29.1	IPI00498913.1	zgc:63602 Zgc:63602	7955	8
140	15.28	15.42	30.1	IPI00503103.2	cyp2j28 Cyp2j28 protein	7955	9
141	15	15	55	IPI01027899.1	zgc:66382 Uncharacterized protein	7955	21
142	14.95	19.58	34.2	IPI00972663.1	shmt2 Uncharacterized protein (Fragment)	7955	10
143	14.77	14.77	23.3	IPI00495281.1	gys2 Uncharacterized protein	7955	8
144	14.72	17.36	41.2	IPI00506920.1	got1 Aspartate aminotransferase	7955	14
145	14.67	14.71	12	IPI00961786.2	LOC100331428 complement C3-like	7955	8
146	14.62	14.71	49.2	IPI00492814.2	etfb Etfb protein	7955	9
147	14.45	14.45	33.3	IPI00914375.2	sord sorbitol dehydrogenase	7955	10
148	14.07	14.07	24	IPI00892413.1	dpys Uncharacterized protein	7955	8
149	14.07	14.07	44.2	IPI00507097.1	gnb2l1 Guanine nucleotide-binding protein subunit beta-2-like 1	7955	9
150	14.06	14.12	30.7	IPI00483912.1	rdh1l Retinol dehydrogenase 1, like	7955	10
151	14.04	14.04	43.8	IPI00498786.2	suclg1 Succinate-CoA ligase, GDP-forming, alpha subunit	7955	11
152	14	14.83	48.2	IPI00500119.1	ppib Peptidyl-prolyl cis-trans isomerase	7955	8
153	14	14.14	40.1	IPI00931488.1	zgc:85789 Ester hydrolase C11orf54 homolog	7955	8
154	14	14.07	31.2	IPI00511820.2	decr1 Uncharacterized protein	7955	7
155	13.98	14.12	32.9	IPI00975369.3	ctsd Uncharacterized protein	7955	8
156	13.96	15.7	27.3	IPI00489851.2	aldh8a1 Aldehyde dehydrogenase family 8 member A1	7955	8
157	13.85	24.8	38.9	IPI00868406.1	hadha Uncharacterized protein	7955	15
158	13.49	13.96	29.4	IPI00772079.5	LOC564077 Uncharacterized protein	7955	8
159	13.47	13.47	45.2	IPI00489287.1	rps19 Uncharacterized protein	7955	7
160	13.43	13.61	14.5	IPI00975328.1	hdlbp Uncharacterized protein	7955	7
161	13.4	13.4	37.9	IPI00497887.1	zgc:85829 Zgc:85829	7955	7
162	13.24	13.24	64	IPI00495615.1	zgc:92880 Zgc:92880	7955	8
163	13.22	13.75	10.4	IPI00618707.6	flnbl filamin-B, partial	7955	7
164	13.05	13.94	16.5	IPI00829266.2	aldh16a1 Uncharacterized protein	7955	10
165	13.01	13.49	44.2	IPI00505391.2	anxa5b Anxa5b protein	7955	7
166	12.89	12.95	39.1	IPI00494197.1	hadhb Hydroxyacyl-Coenzyme A dehydrogenase/3-ketoacyl-Coenzyme A thiolase/enoyl-Coenzyme A hydratase (Trifunctional protein), beta subunit	7955	8
167	12.86	12.93	10.8	IPI00506519.3	cp Uncharacterized protein	7955	7
168	12.77	13.18	47.8	IPI00502389.1	echs1 Uncharacterized protein	7955	7
169	12.74	12.74	36.1	IPI00504070.1	zgc:92041 Zgc:92041	7955	9
170	12.65	12.65	52.2	IPI00507986.1	rps3 Uncharacterized protein	7955	7
171	12.58	12.58	57	IPI00997500.1	nme4 Nucleoside diphosphate kinase	7955	9
172	12.4	12.58	32.4	IPI00836013.1	cbsa Uncharacterized protein	7955	6
173	12.39	21.7	19.4	IPI00865727.4	dZ204D19.2;myh10 Uncharacterized protein	7955	15
174	12.37	12.59	28.8	IPI00507572.1	pdia4 Protein disulfide isomerase associated 4	7955	7
175	12.37	12.43	72	IPI00480940.2	ddt D-dopachrome tautomerase	7955	10
176	12.31	12.36	27.4	IPI00512192.2	zgc:55856 Zgc:55856 protein	7955	11
177	12.29	12.34	15.2	IPI00511624.5	pcca Propionyl-Coenzyme A carboxylase, alpha polypeptide	7955	6
178	12.19	12.24	21.2	IPI00617410.3	aco1 Iron regulatory protein 1	7955	9
179	12.12	12.16	32.8	IPI00501589.4	uqcrc2 Ubiquinol-cytochrome c reductase core protein II	7955	8
180	12.11	12.36	18.6	IPI00485280.2	pabpc1a Poly A binding protein, cytoplasmic 1 a	7955	6
181	12.11	12.29	27.7	IPI00615919.1	pdip5 Protein disulfide isomerase-related protein	7955	6
182	12.11	12.19	40	IPI00495689.4	rbp2b Uncharacterized protein	7955	9
183	12.11	12.11	50.9	IPI00877464.1	cbr1l 20 beta-hydroxysteroid dehydrogenase	7955	8
184	12.1	12.1	24.4	IPI00516101.1	zgc:103559 Zgc:103559	7955	7
185	12.05	12.06	31.5	IPI00490042.1	zgc:101129 Zgc:101129	7955	8
186	12.02	12.09	22.6	IPI00633223.2	selenbp1 Uncharacterized protein	7955	6
187	12.02	12.09	77.2	IPI00773429.2	rplp2l Uncharacterized protein	7955	9
188	12	12.25	25.7	IPI00485171.4	tufm Elongation factor Tu	7955	6
189	12	12	31.8	IPI00506951.1	pdhb Uncharacterized protein	7955	6
190	11.75	11.75	61	IPI00488350.1	cox5aa;LOC100537689 Uncharacterized protein	7955	7
191	11.61	11.61	47.8	IPI00499593.4	zgc:162944 Zgc:162944 protein	7955	7
192	11.44	11.83	41.2	IPI00510668.3	rps3a 40S ribosomal protein S3a	7955	7
193	11.43	11.74	21.8	IPI00771899.2	acox1 Acyl-coenzyme A oxidase	7955	6
194	11.42	11.47	21.7	IPI00495887.1	hsd17b4 Hsd17b4 protein	7955	7
195	11.37	11.44	32.5	IPI00489936.2	zgc:64106 Uncharacterized protein	7955	6
196	11.33	11.48	17.4	IPI00807067.2	mut Uncharacterized protein	7955	6
197	11.27	11.29	25.6	IPI00972490.1	phb Uncharacterized protein	7955	7
198	11.24	11.37	21.4	IPI00497503.3	zgc:110692 Cytochrome P450 CYP2Y3	7955	6
199	11.21	11.21	27.1	IPI00498960.3	dci Uncharacterized protein	7955	7
200	11.12	11.23	33.2	IPI00495614.1	taldo1 Transaldolase	7955	7
201	11.1	11.14	46.7	IPI00485290.6	apoa4 Apolipoprotein A-IV	7955	6
202	11.09	11.27	18.3	IPI00511568.2	dldh Dihydrolipoyl dehydrogenase	7955	7
203	10.99	11.05	35.4	IPI00488038.1	fh Fumarate hydratase, mitochondrial	7955	7
204	10.84	10.96	52.3	IPI00994952.1	zgc:153867 Uncharacterized protein	7955	7
205	10.84	10.84	34	IPI00489824.2	hpx Hemopexin	7955	9
206	10.61	10.61	80.1	IPI00484712.2	atp5h Uncharacterized protein	7955	7
207	10.57	10.78	36.8	IPI00998048.1	rpn1 Uncharacterized protein	7955	6
208	10.55	10.55	23.4	IPI00487665.1	cct3 Uncharacterized protein	7955	7
209	10.53	10.62	21.9	IPI00817490.2	cpt2 carnitine O-palmitoyltransferase 2, mitochondrial	7955	7
210	10.42	10.42	61.2	IPI00511345.2	cfl1 Uncharacterized protein	7955	5
211	10.37	10.44	38.5	IPI00507638.2	hnrnpa0 Heterogeneous nuclear ribonucleoprotein A0	7955	6
212	10.36	10.36	44.1	IPI00960673.1	LOC560616 histone H3.2-like	7955	6
213	10.25	10.29	36.8	IPI00509532.2	gstal Glutathione S-transferase	7955	7
214	10.24	10.41	22.7	IPI00484788.2	pdha1a Uncharacterized protein	7955	5
215	10.24	10.35	21.7	IPI00799748.1	zgc:153034 Zgc:153034	7955	5
216	10.22	11.27	61.6	IPI00508226.4	ppia Peptidyl-prolyl cis-trans isomerase	7955	9
217	10.08	10.51	8.1	IPI00862577.2	LOC558044 Uncharacterized protein	7955	6
218	10.06	10.15	19.9	IPI00510954.1	mao Amine oxidase [flavin-containing]	7955	6
219	10.05	10.28	45.4	IPI00490073.1	rps18 40S ribosomal protein S18	7955	5
220	10.05	10.13	39.3	IPI00501609.2	gstt1b Glutathione S-transferase theta 1b	7955	9
221	10.05	10.05	21.6	IPI00503163.2	abat 4-aminobutyrate aminotransferase, mitochondrial	7955	5
222	10.04	49.49	49.6	IPI00833472.2	pc Pc protein	7955	48
223	10.04	10.12	24.1	IPI00513087.1	zgc:92453 Zgc:92453	7955	5
224	10.04	10.07	51.9	IPI00554402.1	arf3b Uncharacterized protein	7955	5
225	10.04	10.04	16.3	IPI00509685.3	eif4a1b Eif4a1b protein	7955	5
226	10.01	10.13	20.7	IPI00921737.1	kmo Kynurenine 3-monooxygenase	7955	5
227	10.01	10.01	40.5	IPI00510559.3	rpl10 Uncharacterized protein	7955	5
228	10	12.12	27	IPI00500416.1	idh2 Isocitrate dehydrogenase	7955	7
229	10	11.05	12.4	IPI00512526.6	gldc Uncharacterized protein	7955	6
230	10	10.1	31.7	IPI00507022.2	hprt1 Uncharacterized protein	7955	5
231	10	10.1	29.2	IPI00972631.1	upp1 Uncharacterized protein	7955	5
232	10	10.08	39	IPI00928780.1	pfn1 Uncharacterized protein	7955	5
233	10	10.07	20.6	IPI00489091.6	zgc:194768 Zgc:194768	7955	7
234	10	10.04	36	IPI00855470.1	cmpk Uncharacterized protein	7955	5
235	10	10	32.3	IPI00481307.1	rpl7a Uncharacterized protein	7955	5
236	10	10	43.8	IPI00513472.1	rps7 40S ribosomal protein S7	7955	6
237	10	10	27.4	IPI00481177.2	zgc:103601 Zgc:103601	7955	5
238	10	10	17	IPI01024533.1	zgc:172295 Uncharacterized protein	7955	5
239	10	10	36.6	IPI00933112.1	ybx1 Y box binding protein 1	7955	5
240	9.75	9.79	43.9	IPI00637941.1	pfn2l Profilin	7955	5
241	9.72	9.83	30.3	IPI00505672.3	rps8 40S ribosomal protein S8	7955	5
242	9.7	9.75	9.3	IPI00612969.1	aars alanyl-tRNA synthetase, cytoplasmic isoform 1	7955	5
243	9.59	9.63	23.2	IPI00485582.4	ncl Zgc:152810 protein	7955	5
244	9.51	11.81	67.8	IPI00483862.1	zgc:77734 diazepam binding inhibitor	7955	11
245	9.48	9.72	13.8	IPI00493061.2	scp2 Uncharacterized protein	7955	5
246	9.44	9.56	66.1	IPI00509732.5	rpl12 Ribosomal protein L12	7955	6
247	9.39	9.46	37.7	IPI00483251.2	amt Aminomethyltransferase	7955	6
248	9.38	9.48	49.3	IPI00774978.2	LOC100004336 hypothetical protein LOC100004336	7955	6
249	9.3	9.3	32.3	IPI00859416.2	slc25a3 Solute carrier family 25 (Mitochondrial carrier	7955	6
250	9.26	9.26	12.9	IPI00506555.2	amy2a Uncharacterized protein	7955	5
251	9.23	9.27	22.2	IPI00615875.4	LOC558239 Uncharacterized protein	7955	5
252	9.22	9.27	40.4	IPI00900997.1	LOC569184 Uncharacterized protein	7955	6
253	9.04	9.3	16.8	IPI00481235.1	pdcd8 Pdcd8 protein	7955	5
254	9	9	22.2	IPI00817939.2	nqo1 NAD(P)H dehydrogenase [quinone] 1 isoform 1	7955	5
255	8.91	15.12	35.3	IPI00758877.1	zgc:109868 Zgc:109868	7955	10
256	8.88	8.88	68.6	IPI00499132.2	pcbd1 Uncharacterized protein	7955	7
257	8.86	8.9	19.6	IPI00962153.1	chdh choline dehydrogenase, mitochondrial-like	7955	6
258	8.75	8.78	49.6	IPI00618434.3	cyb5a Uncharacterized protein	7955	7
259	8.73	9.08	15.9	IPI00502496.1	ehhadh Peroxisomal bifunctional enzyme	7955	4
260	8.58	8.58	48.9	IPI00489033.1	cahz Carbonic anhydrase	7955	5
261	8.54	8.54	33.8	IPI00501341.4	zgc:92502 Zgc:92502	7955	4
262	8.41	8.41	37.5	IPI00493658.2	rps2 Uncharacterized protein	7955	6
263	8.39	8.45	45.6	IPI00512330.2	hadh Uncharacterized protein	7955	4
264	8.38	8.39	31.9	IPI00490401.4	atp5c1 ATP synthase gamma chain	7955	7
265	8.32	8.32	44.4	IPI00490411.1	tpt1 Translationally-controlled tumor protein homolog	7955	5
266	8.31	8.31	19.7	IPI00498284.1	fgg Uncharacterized protein	7955	4
267	8.3	8.3	33.3	IPI00505335.3	ppa1 Uncharacterized protein	7955	5
268	8.27	16.34	54	IPI00512534.5	calrl Calreticulin like	7955	12
269	8.24	8.28	31.7	IPI00500824.5	rpl7 Ribosomal protein L7	7955	5
270	8.22	8.38	47.1	IPI00997880.1	nme2b.2 Nucleoside diphosphate kinase	7955	5
271	8.18	8.45	19.6	IPI00637460.2	mccc2 Methylcrotonoyl-Coenzyme A carboxylase 2	7955	4
272	8.16	8.16	33.3	IPI01023720.1	rps25 15 kDa protein	7955	4
273	8.14	8.19	22.9	IPI00995128.1	akr1b1 Uncharacterized protein (Fragment)	7955	4
274	8.12	8.18	6	IPI01007542.1	acaca acetyl-CoA carboxylase isoform 2	7955	4
275	8.1	8.44	20.9	IPI00972117.1	ctrb1 Uncharacterized protein	7955	7
276	8.09	8.09	13	IPI00487194.4	fga fibrinogen alpha chain	7955	4
277	8.06	8.09	24.1	IPI00786528.2	pter Phosphotriesterase-related protein	7955	5
278	8.05	8.05	20.8	IPI00505526.1	rpl4 Uncharacterized protein	7955	4
279	8.04	12.09	70.5	IPI00504420.1	fabp7a Uncharacterized protein	7955	10
280	8.04	8.04	28	IPI00500626.3	rpl13 60S ribosomal protein L13	7955	4
281	8.03	8.18	13.3	IPI00504625.2	syncrip Uncharacterized protein	7955	4
282	8.02	8.02	16.9	IPI00496979.2	uqcrc1 Uncharacterized protein	7955	5
283	8.01	8.01	67.8	IPI00506488.1	rplp2 Uncharacterized protein	7955	5
284	8	14.29	12	IPI00505602.4	c3b Uncharacterized protein	7955	8
285	8	10.43	57.3	IPI00619777.1	si:ch211-5k11.6 Si:xx-by187g17.5	7955	13
286	8	8.13	23.7	IPI00505523.2	ak2 Adenylate kinase 2, mitochondrial	7955	5
287	8	8.08	13	IPI00495382.2	retsat Putative all-trans-retinol 13,14-reductase	7955	4
288	8	8.07	23.2	IPI00817732.1	psmc3 Uncharacterized protein	7955	4
289	8	8.04	19.2	IPI00851355.2	dera 2-deoxyribose-5-phosphate aldolase homolog	7955	4
290	8	8	30.9	IPI00995887.1	try Uncharacterized protein (Fragment)	7955	7
291	8	8	30.1	IPI00500253.1	rpl10a 60S ribosomal protein L10a	7955	4
292	8	8	27.9	IPI00503058.4	pgrmc1 Uncharacterized protein	7955	4
293	8	8	45	IPI00490371.2	fabp6 Fatty acid-binding protein 6	7955	4
294	8	8	16.5	IPI01024104.1	oat Uncharacterized protein	7955	4
295	8	8	55	IPI00509551.3	calm2b;calm2a;calm3b;calm1a;calm1b;calm3a Calmodulin	7955	7
296	8	8	23.8	IPI01023519.1	- Uncharacterized protein	7955	4
297	8	8	34.6	IPI00855614.1	qdpra Uncharacterized protein	7955	7
298	8	8	11.5	IPI00510085.2	ddx39a Ddx39a protein	7955	5
299	8	8	21.1	IPI01024111.1	phyhd1 Uncharacterized protein	7955	4
300	8	8	56	IPI00512373.2	atp5d Uncharacterized protein	7955	4
301	7.93	9.96	42.1	IPI00497676.3	vdac2 Voltage-dependent anion channel 2	7955	5
302	7.86	7.89	40.5	IPI00495407.1	myl9l Uncharacterized protein	7955	6
303	7.86	7.86	15.9	IPI00510069.1	etfdh Zgc:92093	7955	4
304	7.83	7.87	41.6	IPI00489853.1	rps10 Uncharacterized protein	7955	5
305	7.83	7.84	52.2	IPI00502356.1	zgc:65996 Zgc:65996	7955	4
306	7.8	7.84	15.5	IPI00971905.2	hexb Uncharacterized protein	7955	4
307	7.78	7.81	17.1	IPI00506328.2	bscv Adipocyte plasma membrane-associated protein	7955	4
308	7.71	7.74	26.1	IPI00997392.1	sult2st2 Uncharacterized protein	7955	4
309	7.66	7.66	57.4	IPI00782820.1	mif Uncharacterized protein	7955	6
310	7.51	13.2	32.7	IPI00504812.3	gpd1 Uncharacterized protein	7955	10
311	7.49	7.53	42.6	IPI00485772.1	zgc:92030 Zgc:92030	7955	7
312	7.42	7.47	19.3	IPI00500902.4	g6pd Glucose-6-phosphate 1-dehydrogenase	7955	4
313	7.39	7.39	53.6	IPI00995237.1	- Uncharacterized protein	7955	4
314	7.34	7.44	39.3	IPI00481915.2	rpl6 Uncharacterized protein	7955	3
315	7.32	9.41	22.1	IPI00490232.4	ckmt1 Uncharacterized protein	7955	5
316	7.31	7.32	24.5	IPI00817786.2	ivd Uncharacterized protein	7955	5
317	7.2	7.23	21.7	IPI00509716.2	amdhd1 Probable imidazolonepropionase	7955	4
318	7.1	20.11	36.7	IPI00503318.3	adh8b Uncharacterized protein	7955	14
319	7.08	7.1	19.8	IPI00882913.3	wu:fb17g07 hypothetical protein LOC797705	7955	3
320	7.07	7.1	30.7	IPI00497482.1	zgc:77052 Zgc:77052	7955	4
321	7.03	7.14	19.1	IPI00972122.1	zgc:63480 NADPH--cytochrome P450 reductase (Fragment)	7955	3
322	6.99	55.02	69.6	IPI00923784.1	aldh2a Aldehyde dehydrogenase 2	7955	48
323	6.92	11.12	74.1	IPI00484580.2	rbp2a Uncharacterized protein	7955	10
324	6.89	6.89	20.9	IPI00483560.1	anxa3b annexin A3b	7955	4
325	6.88	9.13	24.7	IPI00484212.2	anxa11b Annexin A11b	7955	7
326	6.88	9.01	28.1	IPI00614907.2	prdx3 Uncharacterized protein	7955	5
327	6.81	6.81	71.7	IPI00511901.1	rplp1 Uncharacterized protein	7955	5
328	6.78	6.78	64.8	IPI00507604.1	zgc:56493 Thioredoxin	7955	5
329	6.69	6.76	49.2	IPI00972183.1	- Histone H2A (Fragment)	7955	5
330	6.67	7.8	34.7	IPI00866585.2	tpm3 Uncharacterized protein	7955	6
331	6.59	6.59	9.6	IPI00817827.1	slc4a1 Solute carrier family 4, anion exchanger, member 1	7955	4
332	6.52	6.7	16.5	IPI00835280.1	acadvl Acadvl protein	7955	3
333	6.51	6.57	29	IPI00481361.3	cyc1 Uncharacterized protein	7955	4
334	6.49	12.65	26	IPI00999020.3	LOC100537803 plastin-2-like, partial	7955	6
335	6.45	6.45	28.6	IPI00491457.2	uqcrfs1;LOC100334857 Ubiquinol-cytochrome c reductase iron-sulfur subunit	7955	3
336	6.42	6.45	19.3	IPI00492705.1	ephx1 Zgc:56126	7955	5
337	6.41	6.41	27.7	IPI00650582.5	zgc:114157 Catechol O-methyltransferase	7955	5
338	6.39	7.3	19	IPI00513243.4	lmnb2 Uncharacterized protein	7955	4
339	6.39	6.44	52.2	IPI00555420.1	zgc:114188 Zgc:114188	7955	7
340	6.35	6.35	16	IPI00638974.3	si:dkey-239i20.2 Si:dkey-239i20.2	7955	4
341	6.3	6.3	58	IPI00484266.2	hspe1 Uncharacterized protein	7955	3
342	6.23	6.23	23.9	IPI00499674.1	serpina7 Serpin peptidase inhibitor, clade A (Alpha-1 antiproteinase, antitrypsin), member 7	7955	4
343	6.19	6.46	34.7	IPI00806146.3	LOC795332 tricarboxylate transport protein, mitochondrial	7955	4
344	6.15	6.25	22.6	IPI00484135.7	acmsd Acmsd protein	7955	4
345	6.12	6.32	10.3	IPI00482833.4	zgc:113006 Uncharacterized protein	7955	3
346	6.11	6.14	21.1	IPI00498671.4	hao1 Hao1 protein	7955	3
347	6.09	6.22	39.4	IPI00509016.2	pgam1a Phosphoglycerate mutase	7955	4
348	6.08	6.11	16.5	IPI00506729.3	actr3 ARP3 actin-related protein 3-like protein	7955	3
349	6.07	6.19	15.6	IPI00490234.2	cct8 Chaperonin containing TCP1, subunit 8	7955	3
350	6.07	6.14	53.7	IPI00490915.3	mb Myoglobin	7955	3
351	6.07	6.12	24.9	IPI00489672.1	zgc:92763 Zgc:92763	7955	3
352	6.06	6.1	28.6	IPI00485245.3	zgc:110339 Zgc:110339	7955	4
353	6.05	6.12	26.5	IPI00503812.2	gamt Guanidinoacetate N-methyltransferase	7955	3
354	6.04	6.04	21	IPI00492829.6	rpl5b Uncharacterized protein	7955	3
355	6.04	6.04	13.4	IPI00773000.5	fetub Uncharacterized protein	7955	3
356	6.04	6.04	19.4	IPI00508268.1	pnp4b Zgc:77825	7955	3
357	6.03	6.16	11.8	IPI00500510.2	mtp Microsomal triglyceride transfer protein	7955	3
358	6.03	6.06	15.7	IPI00508544.2	dlst Dihydrolipoamide S-succinyltransferase	7955	3
359	6.03	6.06	35	IPI00871008.1	zgc:174895 Zgc:174895 protein	7955	3
360	6.02	6.09	12.6	IPI00500568.2	scinlb Uncharacterized protein	7955	4
361	6.02	6.05	5.3	IPI01027913.1	fasn fatty acid synthase	7955	3
362	6.02	6.05	23.8	IPI00496254.3	sult3st2 Uncharacterized protein	7955	4
363	6.02	6.02	37.7	IPI00508331.2	rps15a Uncharacterized protein	7955	3
364	6.01	6.08	11.1	IPI00499836.5	papss2a Zgc:153748	7955	3
365	6.01	6.01	14.8	IPI00501350.2	zgc:110783 MOSC domain-containing protein 1, mitochondrial	7955	3
366	6	23.49	74.4	IPI01004772.1	LOC100538287 fumarylacetoacetase-like, partial	7955	18
367	6	12	33.9	IPI00501838.2	ywhaqb Uncharacterized protein	7955	10
368	6	8.55	7.5	IPI00506379.6	kpnb3 Uncharacterized protein	7955	4
369	6	6.19	30.2	IPI00499584.3	zgc:112056 Uncharacterized protein	7955	4
370	6	6.12	20.2	IPI00481232.2	cyp1a Cytochrome P450, family 1, subfamily A, polypeptide 1	7955	3
371	6	6.11	22.1	IPI00490609.2	zgc:92237 40S ribosomal protein S6	7955	3
372	6	6.07	16.7	IPI00498033.3	setb Myeloid leukemia-associated SET translocation protein	7955	3
373	6	6.07	13.4	IPI00554382.4	lipf Uncharacterized protein	7955	3
374	6	6.07	32.4	IPI00500325.1	rpl36 60S ribosomal protein L36	7955	3
375	6	6.06	23.6	IPI00487122.1	cct4 T-complex protein 1 subunit delta	7955	3
376	6	6.06	40.8	IPI00490384.2	cirbp;eef1da Cold inducible RNA binding protein	7955	4
377	6	6.06	15.7	IPI00513610.2	sult3st1 Uncharacterized protein	7955	3
378	6	6.05	7	IPI00920601.2	naca nascent polypeptide-associated complex subunit alpha isoform 1	7955	3
379	6	6.04	14.2	IPI00616233.5	aldh5a1 Uncharacterized protein	7955	3
380	6	6.04	51.4	IPI00481155.2	rpl23 60S ribosomal protein L23	7955	4
381	6	6.03	13.8	IPI00502158.4	si:dkey-11e23.4 acyl-coenzyme A thioesterase 2, mitochondrial	7955	3
382	6	6.03	31.8	IPI00504978.1	park7 Protein DJ-1	7955	3
383	6	6.03	28.2	IPI00497458.2	zgc:112315 Glyoxalase domain-containing protein 5	7955	3
384	6	6.01	37.5	IPI00516132.1	zgc:101847 Protein NDRG2	7955	6
385	6	6	16.8	IPI00490409.3	adh5 Uncharacterized protein	7955	3
386	6	6	13.7	IPI00511706.5	LOC100334830 kynureninase-like	7955	3
387	6	6	9.5	IPI00493829.1	zgc:64119 Zgc:64119	7955	3
388	6	6	40.6	IPI00758936.1	rpl30 Uncharacterized protein	7955	3
389	6	6	27.3	IPI00509360.2	rps12 40S ribosomal protein S12	7955	4
390	6	6	30.2	IPI00508844.1	rpl9 Uncharacterized protein	7955	3
391	6	6	49.5	IPI00494206.2	glrx Glutaredoxin	7955	4
392	6	6	26.7	IPI00851335.1	isoc2 Uncharacterized protein	7955	4
393	6	6	22.4	IPI00833505.1	zgc:92357 Uncharacterized protein	7955	3
394	6	6	12.8	IPI00500645.1	ssr1 Translocon-associated protein alpha	7955	3
395	6	6	29.8	IPI00487987.1	rps14 Uncharacterized protein	7955	3
396	5.98	5.98	37.8	IPI00497691.1	zgc:77235 Zgc:77235	7955	4
397	5.92	6.03	43.5	IPI00498381.1	fkbp1aa Zgc:73373	7955	3
398	5.92	5.92	18.9	IPI00786625.1	zgc:153322 Zgc:153322	7955	3
399	5.82	5.85	48.3	IPI00997054.2	ubb Zgc:172187 protein (Fragment)	7955	5
400	5.8	5.8	29.9	IPI00487430.1	rps9 ribosomal protein S9	7955	3
401	5.76	5.76	30.8	IPI00500096.4	cryl1 Uncharacterized protein	7955	4
402	5.7	5.7	10.6	IPI00497357.2	dbt Dihydrolipoamide branched chain transacylase E2	7955	3
403	5.68	5.68	15	IPI00490730.6	LOC569348 GDH/6PGL endoplasmic bifunctional protein-like	7955	7
404	5.64	5.75	17.1	IPI00631948.2	allc Isoform 2 of Allantoicase	7955	3
405	5.63	5.63	12.2	IPI00619557.5	ido1 Putative indoleamine 2,3-dioxygenase	7955	3
406	5.51	5.72	33.6	IPI00508932.3	fabp11a;LOC100536788 Uncharacterized protein	7955	4
407	5.51	5.51	27.4	IPI00499105.2	rpl24 60S ribosomal protein L24	7955	3
408	5.48	5.48	19.2	IPI00493405.2	zgc:101710 Zgc:101710 protein	7955	3
409	5.45	5.52	14.9	IPI00829307.2	acss1 acyl-CoA synthetase short-chain family member 1	7955	3
410	5.43	5.43	32	IPI00897674.2	fdx1 Uncharacterized protein	7955	4
411	5.4	5.47	12.8	IPI00844973.1	hal Histidine ammonia-lyase	7955	4
412	5.3	5.3	24.6	IPI01006620.1	LOC100332749;serbp1 Uncharacterized protein	7955	3
413	5.21	5.21	10.6	IPI00834420.2	cpb1 Uncharacterized protein	7955	3
414	5.16	5.16	19.9	IPI00612598.3	rdh1 Retinol dehydrogenase 1	7955	4
415	5.13	5.16	19.7	IPI00773562.1	ugdh Uncharacterized protein	7955	3
416	5.11	5.11	14	IPI00972523.1	eef1g Elongation factor 1-gamma	7955	3
417	5	5	29	IPI00500941.4	si:ch211-15d5.5 Si:ch211-15d5.5	7955	3
418	4.95	5.08	14.9	IPI01023689.1	zgc:153346 Uncharacterized protein	7955	3
419	4.89	5.17	20.8	IPI00480914.3	ddost Uncharacterized protein	7955	3
420	4.86	4.86	16.5	IPI00505928.1	cct2 Chaperonin containing TCP1, subunit 2	7955	3
421	4.85	4.91	17.4	IPI00496595.1	aspdh Putative L-aspartate dehydrogenase	7955	4
422	4.82	4.84	9.5	IPI00851328.2	dnpep Uncharacterized protein	7955	3
423	4.81	4.81	12.9	IPI00492519.2	calua Calumenin-A	7955	3
424	4.78	5.01	6.3	IPI00960682.2	LOC568102 Uncharacterized protein	7955	3
425	4.75	4.81	30.3	IPI00639643.3	si:ch211-270n8.1 Uncharacterized protein	7955	3
426	4.73	4.98	29.8	IPI00486311.2	cdc42l Uncharacterized protein	7955	3
427	4.67	4.75	10.2	IPI00488732.3	agxt2l1 Alanine--glyoxylate aminotransferase 2-like 1	7955	3
428	4.61	4.61	14.7	IPI00513090.2	atp1b1a ATPase, Na+/K+ transporting, beta 1a polypeptide	7955	3
429	4.55	4.62	22.7	IPI00963003.2	LOC100333777 Uncharacterized protein	7955	3
430	4.53	36.95	57.1	IPI00809369.2	zgc:163069 ATP synthase subunit beta	7955	40
431	4.53	4.56	15	IPI00616809.1	a1cf APOBEC1 complementation factor isoform 2	7955	3
432	4.46	4.46	14.1	IPI01007321.1	flna filamin-A-like, partial	7955	3
433	4.43	4.43	15.4	IPI00505502.2	gcdh Uncharacterized protein	7955	3
434	4.42	4.82	6	IPI00503447.1	apobl Uncharacterized protein	7955	3
435	4.39	4.47	11.3	IPI00865448.2	LOC564844 malate synthase-like	7955	3
436	4.38	4.45	33	IPI00499368.3	rtn3;LOC100538268 Uncharacterized protein	7955	2
437	4.37	8.45	49.8	IPI00570342.2	zgc:110380 Uncharacterized protein	7955	5
438	4.36	4.36	21.7	IPI00650155.2	rtn4a reticulon-4 isoform 4-l	7955	3
439	4.26	4.26	9.8	IPI00570253.1	ugt1a1;ugt1a4 UDP glucuronosyltransferase 1 family, polypeptide A4 precursor	7955	2
440	4.22	5.7	21.8	IPI00497049.2	zgc:162396 Zgc:162396 protein	7955	3
441	4.19	4.22	13.1	IPI00482211.4	si:dkey-276i5.1 glycyl-tRNA synthetase	7955	2
442	4.19	4.19	18.6	IPI00516016.2	sult1st3 Uncharacterized protein	7955	2
443	4.18	4.55	18.5	IPI00855361.1	zgc:85777 Zgc:85777	7955	4
444	4.18	4.18	77.3	IPI00650873.2	zgc:195154 Thymosin beta-11	7955	4
445	4.15	4.29	7.7	IPI01007423.1	LOC100006895 alpha-2-macroglobulin-like isoform 2	7955	2
446	4.14	6.43	38.7	IPI00487482.1	zgc:65861 Zgc:65861	7955	3
447	4.13	4.13	21.6	IPI00503909.4	rpl14 Uncharacterized protein	7955	2
448	4.12	4.13	24.6	IPI00963069.2	LOC100331639 Uncharacterized protein	7955	3
449	4.1	11.62	15.1	IPI00513242.3	myh11 Uncharacterized protein	7955	8
450	4.09	4.14	9.7	IPI00865876.3	LOC100536494 protein NLRC3-like	7955	2
451	4.09	4.09	42.2	IPI00923296.1	atp5j ATP synthase-coupling factor 6, mitochondrial	7955	4
452	4.07	4.24	9.9	IPI00860440.2	cpne1 Cpne1 protein	7955	2
453	4.07	4.13	22.5	IPI00509620.3	zgc:64031 Zgc:64031	7955	2
454	4.07	4.1	21.8	IPI00508542.1	zgc:86898 Zgc:86898	7955	2
455	4.07	4.07	47.7	IPI00492068.1	zgc:92631 cytochrome c oxidase subunit VIb-like	7955	3
456	4.06	4.92	13.9	IPI00554351.4	rrbp1 Uncharacterized protein	7955	3
457	4.06	4.13	8	IPI00502653.1	col1a2 Uncharacterized protein	7955	2
458	4.06	4.13	11.4	IPI01023575.1	kpnb1 importin subunit beta-1	7955	2
459	4.05	4.05	37.4	IPI00996689.1	zgc:158409 Uncharacterized protein	7955	2
460	4.05	4.05	17.2	IPI00650295.1	eef1db elongation factor-1, delta, b isoform 2	7955	2
461	4.04	21.33	36.3	IPI00482496.2	tuba8l2 Tubulin, alpha 8 like 2	7955	16
462	4.04	5.02	12.2	IPI00806987.3	zgc:153296 Zgc:153296	7955	3
463	4.04	4.1	10.9	IPI00868415.1	zgc:171674 Zgc:171674 protein	7955	2
464	4.04	4.08	13	IPI00502580.1	cyp2j25 Uncharacterized protein	7955	2
465	4.04	4.06	32.5	IPI00993262.1	zgc:92872 Ribosomal protein L18	7955	2
466	4.04	4.06	23.3	IPI00503173.3	ephx1l epoxide hydrolase 1	7955	2
467	4.03	12.14	41.2	IPI00509935.1	ywhabl Uncharacterized protein	7955	9
468	4.03	4.1	9.3	IPI00501165.2	hspa4b Uncharacterized protein	7955	2
469	4.03	4.09	13.8	IPI00995035.1	cct6a Uncharacterized protein	7955	3
470	4.03	4.03	22.2	IPI00496710.2	sb:cb252 Uncharacterized protein	7955	2
471	4.02	4.26	17.4	IPI00555330.1	cryz Crystallin, zeta	7955	3
472	4.02	4.09	7.4	IPI00501244.2	jup Junction plakoglobin	7955	3
473	4.02	4.05	7	IPI00507226.7	aass aminoadipate-semialdehyde synthase	7955	3
474	4.02	4.02	16.7	IPI00932265.2	clic5 Uncharacterized protein	7955	2
475	4.02	4.02	21.5	IPI00833670.1	rbks Ribokinase	7955	2
476	4.01	4.11	12.6	IPI00632609.2	sars Uncharacterized protein	7955	4
477	4.01	4.04	5.4	IPI00508462.2	nnt Uncharacterized protein	7955	2
478	4.01	4.01	30.9	IPI00492347.4	gpx4b glutathione peroxidase 4b	7955	2
479	4.01	4.01	19.5	IPI00934559.2	zgc:56466 protein NipSnap homolog 3A	7955	2
480	4	8.7	25.2	IPI00512269.3	ldha L-lactate dehydrogenase A chain	7955	8
481	4	6.53	44.6	IPI00786755.1	zgc:153405 Zgc:153405	7955	3
482	4	6	31.3	IPI00635947.2	h2afvl Histone H2A	7955	4
483	4	4.22	8.7	IPI00612196.2	uba1 Ubiquitin-like modifier activating enzyme 1	7955	2
484	4	4.19	6.5	IPI00507228.4	si:ch73-252g14.4 Uncharacterized protein	7955	2
485	4	4.15	12.6	IPI00859430.2	wu:fc21h01 cytochrome P450-like	7955	2
486	4	4.12	21.6	IPI00855374.1	ptrfb Uncharacterized protein	7955	2
487	4	4.11	11.1	IPI00507696.1	crata Zgc:92317	7955	2
488	4	4.1	13.8	IPI00483019.1	hyou1 Hypoxia up-regulated protein 1	7955	2
489	4	4.1	5.8	IPI00507875.1	psmd2 Proteasome (Prosome, macropain) 26S subunit, non-ATPase, 2	7955	2
490	4	4.1	22	IPI00501310.2	pgam2 Phosphoglycerate mutase	7955	2
491	4	4.08	11.7	IPI00972276.1	c9 Uncharacterized protein	7955	4
492	4	4.07	19.3	IPI00570288.2	zgc:110137 complement component 1 Q subcomponent-binding protein, mitochondrial	7955	2
493	4	4.07	9.6	IPI00510029.9	LOC566865 hypothetical LOC566865	7955	2
494	4	4.06	9.3	IPI00491304.4	cndp2 CNDP dipeptidase 2	7955	2
495	4	4.06	16.8	IPI00501378.1	rpl19 60S ribosomal protein L19	7955	2
496	4	4.06	9.2	IPI00497153.3	sucla2 Uncharacterized protein	7955	3
497	4	4.06	14.9	IPI00500018.3	sult1st6 Sult1 isoform 6	7955	2
498	4	4.06	9.5	IPI00884637.1	ptmaa Ptmaa protein	7955	2
499	4	4.05	12.6	IPI00932297.2	anp32a Uncharacterized protein	7955	2
500	4	4.05	26.7	IPI00507457.1	nhp2 H/ACA ribonucleoprotein complex subunit 2-like protein	7955	2
501	4	4.05	17.7	IPI00500296.3	ak4 Zgc:85790	7955	2
502	4	4.04	7.2	IPI00488653.2	slc27a2 Solute carrier family 27 (Fatty acid transporter), member 2	7955	2
503	4	4.04	10	IPI00493887.3	hnrpkl Uncharacterized protein	7955	2
504	4	4.03	15	IPI01005348.1	LOC100537965 Uncharacterized protein	7955	2
505	4	4.03	13.9	IPI01023874.1	cth Uncharacterized protein	7955	2
506	4	4.03	9.7	IPI00971841.1	zgc:66127 Uncharacterized protein	7955	2
507	4	4.03	19.2	IPI00919969.1	bdh2 19 kDa protein	7955	2
508	4	4.03	8.2	IPI00618689.7	LOC100000597 LOC100000597 protein (Fragment)	7955	2
509	4	4.03	14.3	IPI00498885.1	capza1b F-actin capping protein alpha-1 subunit	7955	2
510	4	4.02	16	IPI00483805.1	zgc:73198 Zgc:73198	7955	2
511	4	4.02	6.8	IPI00504031.1	zgc:100824 Diphosphomevalonate decarboxylase	7955	2
512	4	4.02	19.8	IPI00484752.2	uqcrb Uncharacterized protein	7955	2
513	4	4.01	11.5	IPI00897561.10	acadl Uncharacterized protein	7955	2
514	4	4	18.6	IPI00500404.3	si:dkey-98p3.7 Uncharacterized protein	7955	2
515	4	4	17	IPI00493442.1	rbm4.3 hypothetical protein LOC406277	7955	2
516	4	4	11.5	IPI00489852.2	immt Uncharacterized protein	7955	2
517	4	4	16.9	IPI00617546.1	psma3 Proteasome subunit alpha type	7955	2
518	4	4	32.5	IPI00504902.1	ube2n Uncharacterized protein	7955	2
519	4	4	28.5	IPI00494738.1	rps13 Uncharacterized protein	7955	2
520	4	4	32.1	IPI00486525.5	sod2 Superoxide dismutase	7955	4
521	4	4	29.4	IPI00928852.1	rps24 40S ribosomal protein S24	7955	2
522	4	4	31.1	IPI00810161.2	ptmab Prothymosin alpha-B	7955	2
523	4	4	7.3	IPI00635332.4	zgc:153148 enolase superfamily 1	7955	2
524	4	4	23.4	IPI00551909.1	psmb3 Proteasome subunit beta type	7955	2
525	4	4	17.4	IPI00496910.4	si:ch73-131e21.5 Uncharacterized protein	7955	2
526	4	4	9.2	IPI00489868.3	pa2g4a Uncharacterized protein	7955	2
527	4	4	22.1	IPI00485604.4	zgc:162544 Uncharacterized protein	7955	2
528	4	4	27.3	IPI01024336.1	lgals2b Uncharacterized protein	7955	2
529	4	4	13.2	IPI00999117.1	tmed9 Uncharacterized protein (Fragment)	7955	2
530	4	4	14.2	IPI00971630.1	ndufb5 Uncharacterized protein	7955	2
531	4	4	9.2	IPI00963241.1	sdpr Uncharacterized protein	7955	2
532	4	4	43.6	IPI00962996.1	LOC100333064 cytochrome b-c1 complex subunit 9-like isoform 1	7955	2
533	4	4	9.1	IPI00854046.1	zgc:77778 Uncharacterized protein	7955	2
534	4	4	13.4	IPI00817954.1	ela3l Uncharacterized protein	7955	2
535	4	4	11.1	IPI00634891.3	as3mt Uncharacterized protein	7955	3
536	4	4	16.1	IPI00507989.1	zgc:85680 Zgc:85680	7955	2
537	4	4	17.2	IPI00506848.3	psmb4 Proteasome subunit beta type	7955	2
538	4	4	11.8	IPI00501169.2	fgb Uncharacterized protein	7955	2
539	4	4	9.3	IPI00496998.2	dhdhl Dihydrodiol dehydrogenase (Dimeric), like	7955	2
540	4	4	25	IPI00490551.3	rpl27 60S ribosomal protein L27	7955	2
541	4	4	20.2	IPI00996558.1	rps26 Uncharacterized protein	7955	2
542	4	4	11.7	IPI00934945.1	LOC557270 eukaryotic translation initiation factor 3, subunit F-like	7955	2
543	4	4	22.3	IPI00505301.2	atp5l Uncharacterized protein	7955	2
544	4	4	7.7	IPI00499957.3	zgc:92111 Organic solute transporter subunit alpha	7955	2
545	4	4	16.7	IPI00494833.1	zgc:73107 Zgc:73107	7955	2
546	4	4	19.3	IPI00492664.3	rps20 Uncharacterized protein	7955	2
547	3.85	3.85	20.6	IPI00817905.1	dcxr Uncharacterized protein	7955	2
548	3.8	3.82	9.2	IPI01016711.1	afmid Uncharacterized protein	7955	2
549	3.77	3.77	31.6	IPI00832447.1	zgc:103600 tetratricopeptide repeat protein 36	7955	2
550	3.72	3.72	10.3	IPI00993775.1	rpn2 Uncharacterized protein	7955	2
551	3.71	3.72	29.6	IPI00919562.1	rpl23a Uncharacterized protein	7955	2
552	3.68	42.25	67.3	IPI00490182.3	glud1a Uncharacterized protein	7955	51
553	3.64	3.64	9.7	IPI00497707.1	wdr1 WD repeat domain 1	7955	2
554	3.6	3.6	12.4	IPI00499213.1	ndufa10 NADH dehydrogenase (Ubiquinone) 1 alpha subcomplex, 10	7955	2
555	3.59	3.61	16.9	IPI00493786.3	nit2 Uncharacterized protein	7955	2
556	3.55	3.57	21.8	IPI00511925.3	rpl3 Uncharacterized protein	7955	2
557	3.55	3.55	23.4	IPI00772422.1	sdha Succinate dehydrogenase complex, subunit A, flavoprotein	7955	3
558	3.54	3.54	19.2	IPI00607460.2	zgc:112210 Uncharacterized protein	7955	3
559	3.5	3.5	13.2	IPI00632292.1	rpl13a Uncharacterized protein	7955	2
560	3.48	3.48	20.7	IPI00502027.1	eif5a2 Zgc:77429 protein	7955	2
561	3.48	3.48	33.8	IPI00851956.1	atp5i Atp5i protein	7955	2
562	3.44	3.45	31	IPI00810517.2	prhoxnb 2-oxo-4-hydroxy-4-carboxy-5-ureidoimidazoline decarboxylase	7955	4
563	3.42	3.57	9.4	IPI00506427.4	lmna Uncharacterized protein	7955	3
564	3.42	3.51	6.3	IPI00864674.3	LOC565774 Uncharacterized protein	7955	2
565	3.41	3.41	9.7	IPI00960362.2	wu:fb66f03 Uncharacterized protein	7955	2
566	3.35	3.37	19.3	IPI00485654.4	si:dkey-72l14.9 Uncharacterized protein	7955	2
567	3.33	3.43	15.6	IPI00513317.1	nap1l1 Uncharacterized protein	7955	2
568	3.21	3.21	9.7	IPI00511575.2	pgm2 Uncharacterized protein	7955	2
569	3.2	3.2	18.1	IPI00508674.1	dhrs1 Uncharacterized protein	7955	3
570	3.11	9.89	28.2	IPI00487033.2	ywhae2 Uncharacterized protein	7955	8
571	3.07	3.12	13.1	IPI00506005.3	psmd1 Proteasome (Prosome, macropain) 26S subunit, non-ATPase, 1	7955	3
572	3.04	3.1	24.2	IPI00868333.1	akr1a1b Uncharacterized protein	7955	2
573	3.03	3.03	38	IPI00831952.1	zgc:56530 Uncharacterized protein	7955	2
574	2.99	3.17	14.7	IPI00503562.1	zgc:92406 Zgc:92406	7955	3
575	2.93	2.97	16.9	IPI00492905.1	rpl11 Uncharacterized protein	7955	2
576	2.92	5.32	17.3	IPI00618655.6	si:ch211-133j6.3 Uncharacterized protein	7955	3
577	2.89	2.91	38	IPI00493144.3	rps4x 40S ribosomal protein S4, X isoform	7955	2
578	2.87	2.89	3.9	IPI00963471.1	LOC100332784 Uncharacterized protein	7955	2
579	2.86	2.87	25.2	IPI00492036.4	rps11 40S ribosomal protein s11	7955	2
580	2.86	2.87	24.7	IPI00501058.3	prdx5 Uncharacterized protein	7955	2
581	2.86	2.86	15.6	IPI00995420.1	LOC100536115 Uncharacterized protein	7955	2
582	2.79	2.79	13.8	IPI01016741.1	serpina1 Serpina1 protein (Fragment)	7955	2
583	2.78	2.78	37.8	IPI00851827.2	eif5a Uncharacterized protein	7955	3
584	2.77	2.77	7.8	IPI00502656.2	bckdha Uncharacterized protein	7955	2
585	2.74	2.74	17.3	IPI00772257.2	khdrbs1a Uncharacterized protein	7955	2
586	2.71	2.76	11.7	IPI00490099.1	dnaja2 Uncharacterized protein	7955	2
587	2.7	2.85	6.5	IPI00901919.2	LOC567370 ubiquitin-like modifier-activating enzyme 6-like	7955	2
588	2.69	2.69	12.9	IPI00513129.2	shbg sex hormone binding globulin	7955	2
589	2.64	4.62	6.5	IPI00804188.3	LOC100006023 Uncharacterized protein	7955	3
590	2.64	2.64	33.1	IPI00505260.3	cox4i1 Cytochrome c oxidase subunit IV isoform 1	7955	2
591	2.6	2.65	10.1	IPI01004578.1	abcb11b bile salt export pump isoform 1	7955	3
592	2.6	2.65	6.7	IPI00505708.2	dpp3 Uncharacterized protein	7955	2
593	2.59	2.6	12.2	IPI00502755.3	flot1b Uncharacterized protein	7955	2
594	2.56	2.56	11	IPI00487369.2	zgc:101598 Zgc:101598	7955	2
595	2.54	13.72	28.7	IPI00487455.3	gapdhs Glyceraldehyde 3-phosphate dehydrogenase, testis-specific	7955	10
596	2.47	4.8	20.9	IPI00501493.2	anxa11a Uncharacterized protein	7955	3
597	2.4	16.59	48.9	IPI00679292.1	zgc:123292 Zgc:123292	7955	21
598	2.39	4.43	10.7	IPI00503338.1	canx Zgc:63524	7955	3
599	2.39	2.39	22.9	IPI00486605.3	pvalb2 Parvalbumin-2	7955	1
600	2.37	2.4	12.9	IPI00484018.4	cyp4v2 Uncharacterized protein	7955	1
601	2.33	2.33	11.9	IPI00513003.2	ezrl Uncharacterized protein	7955	1
602	2.28	2.41	10.3	IPI00510185.3	col6a1 collagen alpha-1(VI) chain	7955	3
603	2.28	2.28	28.6	IPI00759097.1	zgc:136826 Ribosomal protein S27	7955	1
604	2.24	2.24	10.3	IPI00995173.1	LOC100538113 Uncharacterized protein	7955	2
605	2.23	2.3	10.7	IPI00495619.3	khk Ketohexokinase	7955	2
606	2.21	15.85	46.7	IPI00501009.2	got2b Aspartate aminotransferase	7955	13
607	2.2	2.2	14.7	IPI00494894.2	cox4i2 Zgc:73355	7955	1
608	2.2	2.2	43.7	IPI00490053.1	zgc:103764 histidine triad nucleotide-binding protein 1	7955	3
609	2.2	2.2	11.3	IPI00861611.1	arpc4;arpc4l Uncharacterized protein	7955	1
610	2.17	2.51	5.1	IPI00972187.1	si:dkey-151c10.1 Uncharacterized protein	7955	1
611	2.17	2.25	7	IPI00487484.4	xdh Uncharacterized protein	7955	2
612	2.16	2.24	9.6	IPI00963239.3	zgc:103715 Aldehyde dehydrogenase	7955	1
613	2.15	2.15	7.5	IPI00972305.1	qars Uncharacterized protein	7955	1
614	2.14	2.14	8.6	IPI00501910.3	ndufs2 NADH dehydrogenase (ubiquinone) Fe-S protein 2	7955	2
615	2.13	2.22	7	IPI00961309.2	vps35 Uncharacterized protein	7955	2
616	2.13	2.13	11.4	IPI00512690.2	stip1 Uncharacterized protein	7955	1
617	2.12	4.37	28.2	IPI00501947.1	phb2 Uncharacterized protein	7955	2
618	2.12	2.12	24.4	IPI00492845.1	mt-co2 Cytochrome c oxidase subunit 2	7955	1
619	2.11	2.26	3	IPI00495942.3	copg2 Isoform 1 of Coatomer subunit gamma-2	7955	1
620	2.1	2.13	13.8	IPI00997326.1	npm1 Uncharacterized protein	7955	2
621	2.09	2.09	14.8	IPI00868462.1	zgc:171683 Zgc:171683 protein	7955	1
622	2.09	2.09	31.7	IPI00483018.1	LOC100330344;ndufa4l NADH dehydrogenase (Ubiquinone) 1 alpha subcomplex 4, like	7955	1
623	2.08	8.97	47	IPI00915641.1	dhrs11b Dehydrogenase/reductase (SDR family) member 11b	7955	7
624	2.08	2.17	5.1	IPI00804142.2	iqgap2 Uncharacterized protein	7955	3
625	2.08	2.12	9.2	IPI00994772.1	- Uncharacterized protein	7955	1
626	2.07	2.07	45.8	IPI00495027.1	zgc:92903 Thioredoxin	7955	2
627	2.06	7.16	23.9	IPI00998930.1	tpm4 Uncharacterized protein	7955	6
628	2.06	2.11	10.1	IPI00503256.2	ctnna Catenin (Cadherin-associated protein), alpha	7955	1
629	2.06	2.08	7.9	IPI00770668.2	adssl Adenylosuccinate synthetase	7955	1
630	2.06	2.06	14.5	IPI00919809.1	si:ch211-170d8.5 Uncharacterized protein	7955	1
631	2.06	2.06	14.9	IPI00505092.1	ran GTP-binding nuclear protein Ran	7955	1
632	2.06	2.06	16.2	IPI00487704.2	zgc:92590 Zgc:92590	7955	3
633	2.05	20.97	57.6	IPI00483215.2	eno1 Enolase	7955	28
634	2.05	2.11	9.7	IPI00961937.2	LOC100332905 Uncharacterized protein	7955	1
635	2.05	2.08	16.7	IPI00505170.3	rpl8 60S ribosomal protein L8	7955	1
636	2.05	2.05	6.4	IPI00998423.1	fdps Uncharacterized protein	7955	1
637	2.05	2.05	9.2	IPI00962364.1	LOC100330524 putative protein phosphatase 1 regulatory inhibitor subunit 3G-like	7955	2
638	2.04	2.18	24.1	IPI00500949.5	anxa1a Annexin A1a	7955	1
639	2.04	2.09	39.3	IPI00551848.2	LOC402883 ATP synthase subunit f, mitochondrial isoform 1	7955	1
640	2.04	2.04	16.5	IPI00500260.1	ppm1bb Uncharacterized protein	7955	1
641	2.04	2.04	6.6	IPI00492140.2	dlat Uncharacterized protein	7955	1
642	2.04	2.04	26.2	IPI00482339.1	cisd1;si:dkey-18n13.4 Zgc:63561	7955	1
643	2.03	11.62	40.8	IPI00834037.2	krt4 Type II basic cytokeratin	7955	23
644	2.03	4.07	73.1	IPI00483990.3	zgc:86706 Cytochrome c	7955	2
645	2.03	2.11	13.2	IPI00931354.2	ces2 Uncharacterized protein (Fragment)	7955	1
646	2.03	2.08	9.9	IPI00504913.2	pdia2 Uncharacterized protein	7955	1
647	2.03	2.06	7.8	IPI00512038.1	ilf2 Interleukin enhancer-binding factor 2 homolog	7955	1
648	2.03	2.05	11.2	IPI00481117.3	mtdha Uncharacterized protein	7955	1
649	2.03	2.04	30.9	IPI00486411.1	rps21 40S ribosomal protein S21	7955	2
650	2.03	2.03	15.1	IPI00501560.1	g3bp1 Uncharacterized protein	7955	1
651	2.03	2.03	13.6	IPI00508277.1	rpl35a Uncharacterized protein	7955	1
652	2.03	2.03	7.3	IPI00502075.2	tmod2 Tropomodulin 2	7955	1
653	2.02	4.12	17.9	IPI00497855.1	tcp1 T-complex protein 1 subunit alpha	7955	2
654	2.02	3.12	17.8	IPI00484639.2	aldh1a2 Aldehyde dehydrogenase 1 family, member A2	7955	3
655	2.02	2.09	10.1	IPI00512109.1	anxa2a Uncharacterized protein	7955	1
656	2.02	2.05	16.7	IPI00758797.1	gmpr2;zgc:136869 GMP reductase	7955	1
657	2.02	2.04	18.9	IPI00944319.1	hagh Isoform 2 of Hydroxyacylglutathione hydrolase, mitochondrial	7955	2
658	2.02	2.03	6.4	IPI00492626.1	ctsa Zgc:65802	7955	2
659	2.02	2.02	6.4	IPI00919782.2	acss2 Uncharacterized protein	7955	1
660	2.02	2.02	11.2	IPI00508578.2	hmgcl 3-hydroxymethyl-3-methylglutaryl-Coenzyme A lyase	7955	2
661	2.02	2.02	10.1	IPI00490557.3	LOC567396 Uncharacterized protein	7955	1
662	2.02	2.02	7.3	IPI00774469.1	zgc:136367 Zgc:136367	7955	2
663	2.02	2.02	27.8	IPI00488986.1	zgc:77767 Barrier-to-autointegration factor	7955	1
664	2.02	2.02	6.7	IPI00483637.2	hibadha Uncharacterized protein	7955	1
665	2.02	2.02	29.1	IPI01004906.1	LOC100536712 hypothetical protein LOC100536712	7955	2
666	2.02	2.02	25.3	IPI00505836.2	icn ictacalcin	7955	2
667	2.02	2.02	21.7	IPI00502633.1	zgc:64130 Zgc:64130	7955	1
668	2.02	2.02	17.3	IPI00489005.3	brp44 Uncharacterized protein	7955	1
669	2.01	25.46	65	IPI00628880.2	acta1b Actin, alpha 1b, skeletal muscle	7955	37
670	2.01	2.26	7.4	IPI00634366.6	LOC562960 hypothetical protein LOC562960	7955	1
671	2.01	2.09	12.1	IPI00509971.2	tfg Uncharacterized protein	7955	1
672	2.01	2.08	19.8	IPI00496365.2	grpel1 GrpE protein homolog	7955	1
673	2.01	2.05	29.5	IPI00507306.2	rhoad Uncharacterized protein	7955	2
674	2.01	2.05	8.9	IPI00865054.2	LOC100330160 Uncharacterized protein	7955	1
675	2.01	2.04	7.7	IPI00613451.8	zgc:162816 Uncharacterized protein	7955	1
676	2.01	2.04	12.3	IPI00493991.10	zgc:101723 Trans-1,2-dihydrobenzene-1,2-diol dehydrogenase	7955	1
677	2.01	2.01	27	IPI00503585.1	srsf5a Uncharacterized protein	7955	1
678	2.01	2.01	11	IPI00616129.2	zgc:198195 Uncharacterized protein	7955	1
679	2.01	2.01	9.3	IPI00859805.3	pccb Uncharacterized protein	7955	1
680	2.01	2.01	7.8	IPI01006947.1	nsfl1c NSFL1 (P97) cofactor	7955	1
681	2.01	2.01	16.4	IPI00997644.1	eif4h eukaryotic translation initiation factor 4H isoform 3	7955	2
682	2.01	2.01	23.9	IPI00498529.1	fam136a Protein FAM136A	7955	1
683	2.01	2.01	15.2	IPI00495374.3	rps15 Ribosomal protein S15	7955	1
684	2	15.81	30.7	IPI00503124.3	tuba8l Tubulin, alpha 8 like	7955	11
685	2	14.12	71.4	IPI00497513.2	zgc:92739 heat-responsive protein 12-like isoform 2	7955	14
686	2	10.73	30.4	IPI00507896.3	rpn1 Ribophorin I	7955	5
687	2	8	17.7	IPI01006237.1	oat ornithine aminotransferase, mitochondrial-like isoform 1	7955	4
688	2	5.95	29.4	IPI00495827.2	calrl2 Calreticulin, like 2	7955	5
689	2	4.27	20.3	IPI00502272.1	zgc:77517 Zgc:77517	7955	10
690	2	4.08	29.7	IPI00656470.2	zgc:123307 Peptidyl-prolyl cis-trans isomerase	7955	5
691	2	4.01	8.4	IPI00496392.4	cpa1 Carboxypeptidase A1	7955	2
692	2	4	15.9	IPI00494078.2	si:ch211-103n10.5 Uncharacterized protein	7955	2
693	2	4	16.2	IPI00485904.1	gcdhl Glutaryl-Coenzyme A dehydrogenase, like	7955	3
694	2	4	14.5	IPI00866392.3	ppa2 Uncharacterized protein	7955	3
695	2	2.81	14.1	IPI00774123.1	zgc:175209 Zgc:175209 protein	7955	2
696	2	2.22	3	IPI00829009.4	LOC100333590 Uncharacterized protein	7955	1
697	2	2.18	23.6	IPI00489258.1	pfn2 Uncharacterized protein	7955	1
698	2	2.16	8.6	IPI00996835.1	LOC100329326 Microtubule-associated protein	7955	1
699	2	2.15	14.4	IPI00499964.2	hddc3 Guanosine-3',5'-bis(diphosphate) 3'-pyrophosphohydrolase MESH1	7955	1
700	2	2.15	12.4	IPI00499039.3	tagln2 Transgelin	7955	1
701	2	2.14	4.9	IPI00492619.5	zgc:113183 SWI/SNF-related, matrix-associated actin-dependent regulator of chromatin, subfamily a, containing DEAD/H box 1	7955	1
702	2	2.14	4.2	IPI00486090.6	lonp1 Lon protease homolog	7955	1
703	2	2.12	10.3	IPI00501258.2	zgc:77126 Zgc:77126	7955	1
704	2	2.11	14.7	IPI00509513.2	aprt Aprt protein	7955	1
705	2	2.1	13.7	IPI00507285.2	cct7 Uncharacterized protein	7955	1
706	2	2.1	6.2	IPI00495779.3	srp68 Uncharacterized protein	7955	1
707	2	2.07	12.7	IPI00494886.2	gbp1 Zgc:92185	7955	1
708	2	2.07	3.2	IPI00961343.2	LOC100331492 complement C3	7955	1
709	2	2.07	36.4	IPI00502509.2	mtpn Myotrophin	7955	1
710	2	2.07	12	IPI00491794.1	slc25a20 Uncharacterized protein	7955	1
711	2	2.06	9.6	IPI00876762.2	rpz5 Rapunzel5	7955	1
712	2	2.06	4.6	IPI00489212.4	eif3s10 Eukaryotic translation initiation factor 3 subunit A	7955	1
713	2	2.06	8.1	IPI00483506.7	atp6v1a Uncharacterized protein	7955	1
714	2	2.06	4.7	IPI00505893.3	zgc:101540 Uncharacterized protein	7955	1
715	2	2.06	14.3	IPI00489204.1	arf6;zgc:172028 ADP-ribosylation factor 6-like	7955	2
716	2	2.06	10.7	IPI00501155.2	eef1b2 Uncharacterized protein	7955	1
717	2	2.05	15.1	IPI00510677.1	usp14 Ubiquitin carboxyl-terminal hydrolase	7955	1
718	2	2.05	5.3	IPI00971625.1	uso1 Uncharacterized protein	7955	1
719	2	2.05	6	IPI00639216.2	nt5c2a Uncharacterized protein	7955	1
720	2	2.05	5.1	IPI00487448.2	copb2 Uncharacterized protein	7955	1
721	2	2.05	10.9	IPI00497750.4	si:dkey-91i10.3 Uncharacterized protein	7955	1
722	2	2.05	13.2	IPI00997924.1	zgc:65987 Zgc:65987	7955	1
723	2	2.05	12.5	IPI00486526.6	zgc:85763 Uncharacterized protein	7955	1
724	2	2.05	15.8	IPI01006163.1	LOC100537859 serine protease inhibitor Kazal-type 2-like	7955	1
725	2	2.05	2	IPI00995779.1	eif3c Uncharacterized protein	7955	1
726	2	2.04	7.1	IPI00654475.1	hnrnpu Heterogeneous nuclear ribonucleoprotein U	7955	1
727	2	2.04	3.5	IPI00902390.1	nomo nodal modulator 1	7955	1
728	2	2.04	8	IPI00480956.1	glrx3 Glutaredoxin 3	7955	1
729	2	2.04	8	IPI00509542.2	psma4 Proteasome subunit alpha type	7955	1
730	2	2.04	20.4	IPI00500537.1	anp32e Acidic leucine-rich nuclear phosphoprotein 32 family member E	7955	2
731	2	2.04	12.5	IPI00509392.1	pdcd5 Uncharacterized protein	7955	1
732	2	2.04	11.8	IPI00492481.1	si:ch211-217g15.2 Fucose mutarotase	7955	1
733	2	2.04	4.8	IPI00502952.2	zgc:63600 spermidine synthase	7955	1
734	2	2.03	11.6	IPI00612423.4	LOC555902 Uncharacterized protein	7955	1
735	2	2.03	9.8	IPI00774470.2	LOC797436 Uncharacterized protein	7955	1
736	2	2.03	4	IPI00758634.2	zgc:136858 Zgc:136858	7955	1
737	2	2.03	14.6	IPI00510462.2	pdap1 Pdgfa associated protein 1	7955	1
738	2	2.03	15	IPI00919624.1	hmga1 Uncharacterized protein	7955	1
739	2	2.03	8.7	IPI00511849.3	fahd1 Zgc:109929	7955	1
740	2	2.03	3.9	IPI00509544.2	prrc1 Protein PRRC1	7955	1
741	2	2.03	2.6	IPI00484709.1	fubp1 Uncharacterized protein	7955	1
742	2	2.02	7.6	IPI00898898.1	snx1 Snx1 protein	7955	1
743	2	2.02	12.1	IPI00619047.3	LOC100001620 Uncharacterized protein	7955	1
744	2	2.02	10.7	IPI00997503.1	idh3a Uncharacterized protein (Fragment)	7955	1
745	2	2.02	10.6	IPI00758910.3	h2afy Histone H2A	7955	1
746	2	2.02	8.2	IPI00506214.1	ssb Uncharacterized protein	7955	1
747	2	2.02	17.1	IPI00489314.1	hmgb1 Uncharacterized protein	7955	1
748	2	2.02	7.9	IPI00495081.4	pipox peroxisomal sarcosine oxidase	7955	1
749	2	2.02	5.3	IPI00491974.3	gss Zgc:101574	7955	1
750	2	2.02	20.3	IPI00487558.1	pbp phosphatidylethanolamine binding protein	7955	1
751	2	2.02	9.8	IPI00995022.1	zgc:73210 Zgc:73210 protein	7955	1
752	2	2.02	15	IPI00993026.1	fau Uncharacterized protein	7955	1
753	2	2.02	11.1	IPI00865352.1	zgc:171660 Zgc:171660 protein	7955	1
754	2	2.02	9.1	IPI00501085.2	galm Zgc:92501	7955	1
755	2	2.02	16.7	IPI00497806.3	btf3 Uncharacterized protein	7955	1
756	2	2.02	22.1	IPI00490709.1	eif1b eukaryotic translation initiation factor 1B	7955	1
757	2	2.02	11.9	IPI00483436.2	ndufs8 Uncharacterized protein	7955	1
758	2	2.02	12.3	IPI00482732.1	arhgdia Uncharacterized protein	7955	1
759	2	2.02	6.6	IPI00996965.1	LOC568697 hypothetical protein LOC568697	7955	1
760	2	2.02	6.6	IPI00961414.1	uo:ion005 ependymin isoform 1	7955	1
761	2	2.02	5.8	IPI00505818.3	zgc:63587 Zgc:63587	7955	1
762	2	2.02	3.8	IPI00497390.4	ldhd Lactate dehydrogenase D	7955	1
763	2	2.01	9.7	IPI00494569.4	prps1a Ribose-phosphate pyrophosphokinase	7955	1
764	2	2.01	21.7	IPI00998220.1	- Uncharacterized protein	7955	1
765	2	2.01	15.6	IPI00993985.1	s100a10b Uncharacterized protein (Fragment)	7955	1
766	2	2.01	15.2	IPI00509524.1	vdac1 Voltage-dependent anion channel 1	7955	3
767	2	2.01	8.2	IPI00619183.3	zgc:123349 Zgc:123349	7955	1
768	2	2.01	29.2	IPI00508000.1	dynll1 Uncharacterized protein	7955	1
769	2	2.01	8.8	IPI00505229.1	hsd17b10 Uncharacterized protein	7955	1
770	2	2.01	15.5	IPI00503863.2	zgc:109973 Zgc:109973	7955	1
771	2	2.01	4.7	IPI00497958.5	serpinb1l2 Uncharacterized protein	7955	1
772	2	2.01	11.6	IPI00484770.1	psmb2 Proteasome subunit beta type	7955	1
773	2	2.01	3.7	IPI00482135.3	sqrdl Uncharacterized protein	7955	1
774	2	2.01	8.9	IPI00920801.2	apom apolipoprotein M	7955	1
775	2	2.01	12.6	IPI00876722.1	zgc:153978 Zgc:153978 protein	7955	1
776	2	2.01	15.5	IPI00486251.3	glrx5 Glutaredoxin-related protein 5, mitochondrial	7955	1
777	2	2	7.8	IPI00483337.3	pl10 Putative RNA helicase	7955	1
778	2	2	10.6	IPI00501377.3	ndufv1 Uncharacterized protein	7955	1
779	2	2	12.2	IPI00760298.2	zgc:136493 Uncharacterized protein	7955	1
780	2	2	43.4	IPI00615495.2	zgc:123210 Zgc:123210 protein	7955	1
781	2	2	25.7	IPI00570168.1	zgc:110298 Zgc:110298	7955	1
782	2	2	7.7	IPI00972079.1	pacsin3 Uncharacterized protein	7955	1
783	2	2	10.4	IPI00829178.1	zgc:158363 Zgc:158363	7955	2
784	2	2	12.5	IPI00817727.1	psma5 Proteasome subunit alpha type	7955	1
785	2	2	21.9	IPI00633389.1	rps16 Uncharacterized protein	7955	1
786	2	2	3.5	RRRRRIPI00860870.2	REVERSED mxg Uncharacterized protein	7955	1
787	2	2	14.4	IPI00998538.1	tmed2 Uncharacterized protein	7955	1
788	2	2	8.7	IPI00998450.1	hug Uncharacterized protein (Fragment)	7955	1
789	2	2	5.8	IPI00994892.1	acy3.2 Uncharacterized protein	7955	1
790	2	2	7.6	IPI00836352.3	lman1 protein ERGIC-53	7955	1
791	2	2	2.8	IPI00618959.2	si:ch211-149g8.3 Oxysterol-binding protein	7955	1
792	2	2	7.4	IPI00511940.2	bsg Uncharacterized protein	7955	1
793	2	2	10.2	IPI00508372.1	vapa VAMP (Vesicle-associated membrane protein)-associated protein A	7955	1
794	2	2	11	IPI00503659.3	ndufs3 NADH dehydrogenase (Ubiquinone) Fe-S protein 3	7955	1
795	2	2	15.9	IPI00501555.1	zgc:112160 Zgc:112160	7955	1
796	2	2	1.8	IPI00500755.3	plg Plasminogen	7955	1
797	2	2	17.1	IPI00500619.1	rpl18a 60S ribosomal protein L18a	7955	1
798	2	2	8.3	IPI00500365.5	rtn4ip1 Reticulon-4-interacting protein 1 homolog, mitochondrial	7955	2
799	2	2	13.2	IPI00498877.1	zgc:66350 Zgc:66350	7955	1
800	2	2	6.1	IPI00493149.3	erp44 Uncharacterized protein	7955	1
801	2	2	7.2	IPI00491204.3	srsf11 Splicing factor, arginine/serine-rich 11	7955	1
802	2	2	16.8	IPI00490815.1	hnrpr Uncharacterized protein	7955	1
803	2	2	16.7	IPI00486130.2	rpl28l Rpl28l protein	7955	1
804	2	2	10.3	IPI00484111.3	zgc:92726 Proteasome subunit alpha type	7955	1
805	2	2	9.8	IPI00484014.1	rcn3 Reticulocalbin 3, EF-hand calcium binding domain	7955	1
806	2	2	9.5	IPI00997848.1	- Uncharacterized protein (Fragment)	7955	1
807	2	2	4.4	IPI00996618.1	map2k6 Uncharacterized protein	7955	1
808	2	2	6.8	IPI00962078.2	LOC795897 saxitoxin and tetrodotoxin-binding protein 2-like	7955	1
809	2	2	5.6	IPI00899658.2	LOC402804 LOC402804 protein (Fragment)	7955	1
810	2	2	22.7	IPI00851874.1	acbd7 acyl-CoA-binding domain-containing protein 7	7955	1
811	2	2	16.3	IPI00758747.1	zgc:136896 Zgc:136896	7955	1
812	2	2	15	IPI00636975.2	apoc2 Uncharacterized protein	7955	1
813	2	2	9.5	IPI00636308.2	bckdhb Branched chain ketoacid dehydrogenase E1, beta polypeptide	7955	1
814	2	2	9.8	IPI00628995.2	LOC799904 III-FBPL	7955	2
815	2	2	8.5	IPI00612891.1	zgc:112435 Zgc:112435	7955	1
816	2	2	22.5	IPI00555459.2	nedd8 Neural cell expressed, developmentally down-regulated 8	7955	1
817	2	2	11.2	IPI00510031.1	rab11a Uncharacterized protein	7955	1
818	2	2	5.5	IPI00508304.2	zgc:100952 Zgc:100952	7955	1
819	2	2	13.8	IPI00507878.2	pvalb4 Uncharacterized protein	7955	1
820	2	2	7.2	IPI00507391.2	sypl2a Synaptophysin-like protein	7955	1
821	2	2	5.4	IPI00494904.4	acads Uncharacterized protein	7955	1
822	2	2	7	IPI00493326.1	mt-atp6 ATP synthase subunit a	7955	1
823	2	2	13.3	IPI00492489.1	zgc:56066 Zgc:56066 protein	7955	1
824	2	2	17	IPI00491519.4	zgc:123327 Uncharacterized protein	7955	2
825	2	2	21	IPI00487283.1	rbp1a Uncharacterized protein	7955	2
826	2	2	8.5	IPI00481355.1	lasp1 Uncharacterized protein	7955	1
827	2	2	8.5	IPI01024428.1	fabp1b.1 14 kDa protein	7955	1
828	2	2	16.7	IPI00997674.1	LOC100536597 Uncharacterized protein	7955	1
829	2	2	3.5	IPI00994585.1	hsd11b3;LOC100006793 Uncharacterized protein	7955	1
830	2	2	4.1	IPI00934178.3	ndufs7 NADH dehydrogenase (ubiquinone) Fe-S protein 7	7955	1
831	2	2	10.3	IPI00933575.1	zgc:101826 Zgc:101826	7955	1
832	2	2	5.2	IPI00932994.1	ranbp1 Uncharacterized protein	7955	1
833	2	2	6.6	IPI00932138.2	esd Uncharacterized protein	7955	2
834	2	2	7.4	IPI00931837.1	nudt5 Uncharacterized protein	7955	1
835	2	2	6.9	IPI00920295.1	ssr4 Uncharacterized protein	7955	1
836	2	2	8.5	IPI00919449.1	ssr3 Uncharacterized protein	7955	1
837	2	2	3.4	IPI00901804.2	LOC568857 Uncharacterized protein	7955	1
838	2	2	8.6	IPI00817268.1	sdcbp2 Uncharacterized protein	7955	1
839	2	2	12.9	IPI00555449.1	zgc:114172 Zgc:114172	7955	1
840	2	2	27	IPI00507934.1	gchfr GTP cyclohydrolase 1 feedback regulatory protein	7955	1
841	2	2	14	IPI00507931.1	zgc:85717 Zgc:85717	7955	2
842	2	2	12	IPI00507764.1	snrpe Small nuclear ribonucleoprotein E	7955	1
843	2	2	10.9	IPI00505312.1	zgc:110525 RNA-binding protein 8A	7955	1
844	2	2	6.1	IPI00505307.1	ctrl Uncharacterized protein	7955	1
845	2	2	6.1	IPI00504006.1	sara2 Uncharacterized protein	7955	1
846	2	2	17.4	IPI00503732.2	rps28 40S ribosomal protein S28	7955	1
847	2	2	8.5	IPI00500278.1	marcksl1 Uncharacterized protein	7955	1
848	2	2	12.8	IPI00499854.7	sepw1 selenoprotein W	7955	1
849	2	2	6.2	IPI00498441.2	rpia Uncharacterized protein	7955	1
850	2	2	14.7	IPI00497950.1	zgc:92895 Mitochondrial import inner membrane translocase subunit Tim13	7955	1
851	2	2	5.5	IPI00497575.3	ndufa12 NADH dehydrogenase (ubiquinone) 1 alpha subcomplex, 12	7955	1
852	2	2	11.9	IPI00496217.2	si:ch211-240l19.8 Uncharacterized protein	7955	1
853	2	2	17.1	IPI00492713.1	si:ch211-239j9.2 cytochrome c oxidase polypeptide VIc-like	7955	2
854	2	2	15.4	IPI00484606.1	npc2 Epididymal secretory protein E1	7955	1
855	2	2	11.9	IPI00484303.2	si:ch211-240l19.6 Uncharacterized protein	7955	1
856	1.89	2.04	7.9	IPI00484719.1	eif5 Uncharacterized protein	7955	1
857	1.89	2.03	10.7	IPI00833987.1	zgc:64002 nicotinamide N-methyltransferase	7955	1
858	1.89	2.01	19.9	IPI00650926.2	gmds GDP-mannose 4,6 dehydratase	7955	2
859	1.89	2.01	5.9	IPI00801939.1	zgc:152830 Zgc:152830	7955	1
860	1.89	1.89	4.1	IPI00498398.2	st13 Uncharacterized protein	7955	1
861	1.84	2.57	27.9	IPI00836885.1	hmox1 Uncharacterized protein	7955	1
862	1.82	1.82	16.8	IPI00511258.4	sdhb Succinate dehydrogenase [ubiquinone] iron-sulfur subunit, mitochondrial	7955	1
863	1.82	1.82	12.9	IPI00656528.1	zgc:123326 Zgc:123326	7955	1
864	1.81	1.82	12.2	IPI00501302.2	abcd3a ATP-binding cassette, sub-family D (ALD), member 3a	7955	1
865	1.77	1.77	28.3	IPI00920489.1	zgc:153177 Uncharacterized protein	7955	1
866	1.74	1.82	10.4	IPI00509779.1	cdc37 Cell division cycle 37 homolog	7955	1
867	1.72	1.72	1.6	IPI00484190.1	acox3 Acyl-coenzyme A oxidase	7955	1
868	1.7	26.91	79	IPI00482837.3	hbaa1 Hemoglobin subunit alpha	7955	56
869	1.68	1.7	4.8	IPI01004994.1	LOC100534742 Uncharacterized protein	7955	1
870	1.66	1.7	8.2	IPI00996610.1	map2k4 Uncharacterized protein	7955	1
871	1.66	1.68	8.5	IPI00498206.4	LOC562242 Uncharacterized protein	7955	1
872	1.6	8.03	31.7	IPI00510770.1	zgc:77650 Zgc:77650	7955	5
873	1.6	1.63	7.6	IPI00901363.1	LOC558050 amine oxidase [flavin-containing] A-like	7955	1
874	1.55	1.55	13.3	IPI00851243.1	mgst2 Uncharacterized protein	7955	1
875	1.5	1.53	37.2	IPI00497294.1	lygl1 Zgc:92608	7955	1
876	1.45	1.45	35.8	IPI00650517.1	si:ch211-258l4.7 Uncharacterized protein	7955	1
877	1.42	1.45	12.1	IPI00613161.1	psmd11a proteasome 216S subunit, non-ATPase, 11a	7955	1
878	1.4	1.41	8.1	IPI00494461.5	dnajb11 Uncharacterized protein	7955	1
879	1.34	1.34	6.9	IPI00491150.2	eif3m Eukaryotic translation initiation factor 3 subunit M	7955	1
880	1.32	1.33	11.2	IPI00923221.1	si:dkeyp-75b4.10 Uncharacterized protein	7955	1
881	1.32	1.32	14.5	IPI00860365.2	dctn2 Uncharacterized protein	7955	1
