# Supplementary material for: Dramatic Improvement of Proteomic Analysis of Zebrafish Liver Tumor by Effective Protein Extraction with Sodium Deoxycholate and Heat Denaturation
Source: Int J Anal Chem. 2015 Mar 19;2015:763969. doi: 10.1155/2015/763969 (PMC4383156; doi:10.1155/2015/763969)
Supplement: Supplementary file 1 — The Supplementary material contains our identified protein list from our 1D shotgun analysis for both DOCΔX (Supplementary Table 1) and SDSΔX (Supplementary Table 2) samples. Supplementary Table 3 contains our identified protein list from our 2D shotgun analysis for DOCΔX sample. Supplementary Table 4 contains the list of representative “canonical pathways” and “diseases and biological functions” with the respective proteins from our identified protein list from Supplementary Table 3 that we obtained from our pathway analysis using IPA. Supplementary Data 1 contains the chromatograms from our 1D (both DOCΔX and SDSΔX) and 2D shotgun analysis (DOCΔX). [file 763969.f1.zip › Supplementary_Table_3.xls]

## Sheet: Sheet1
N	Unused	Total	% Cov	Accession #	Name	Species	Peptides(95%)
1	337.07	337.07	87	IPI00865996.2	spna2 Alpha II-spectrin	7955	238
2	254.98	255	98.9	IPI00486027.1	krt8 Keratin, type II cytoskeletal 8	7955	484
3	240.64	240.75	98.3	IPI00931751.1	cat Catalase	7955	388
4	228.83	228.97	88.5	IPI00929039.3	myh9l1 myosin-9, partial	7955	303
5	226.63	226.76	88.9	IPI00931821.2	zgc:123047 Uncharacterized protein	7955	338
6	220.08	220.33	95.5	IPI00490006.2	bactin2 Actin, cytoplasmic 2	7955	480
7	213.04	213.95	95.8	IPI01016814.1	bhmt Uncharacterized protein	7955	381
8	203.53	203.58	83.6	IPI01024186.1	pygl Phosphorylase	7955	275
9	201.45	201.69	95.9	IPI00996298.1	aldob Fructose-bisphosphate aldolase	7955	363
10	200.72	201.48	95.8	IPI00483853.1	glud1b glutamate dehydrogenase 1b	7955	358
11	197.23	197.35	95	IPI00512240.1	ef1a Elongation factor 1-alpha	7955	303
12	194.34	196.8	86.4	IPI00934435.2	myhc4 Uncharacterized protein	7955	188
13	190.63	194.01	90.4	IPI00494371.3	krt18 Keratin, type I cytoskeletal 18	7955	324
14	188.91	189.1	85.4	IPI01023708.1	LOC558044 Uncharacterized protein	7955	171
15	187.81	189.89	97	IPI00490877.3	eno3 beta-enolase	7955	326
16	181.95	182.85	89.9	IPI00993204.1	aldh1l1 Uncharacterized protein	7955	236
17	179.82	180.14	78.8	IPI00486876.4	agl amylo-1, 6-glucosidase, 4-alpha-glucanotransferase	7955	202
18	176.97	177.93	93	IPI00920751.1	aldh2b Mitochondrial aldehyde dehydrogenase 2b	7955	247
19	173.39	174.92	94.2	IPI00851389.4	LOC567822 Uncharacterized protein	7955	188
20	173.21	175.06	91.5	IPI00491975.2	atp5a1 ATP synthase subunit alpha	7955	251
21	170.14	174.36	95.8	IPI00497753.5	gapdh Glyceraldehyde-3-phosphate dehydrogenase	7955	305
22	169.73	170.56	92.1	IPI00897805.2	zgc:111961 ATP synthase subunit beta	7955	315
23	168.64	221.1	86.6	IPI00865727.4	dZ204D19.2;myh10 Uncharacterized protein	7955	235
24	166.28	169.43	98.5	IPI01016879.1	zgc:56326 Uncharacterized protein	7955	199
25	162.32	164.46	69.5	IPI00503447.1	apobl Uncharacterized protein	7955	145
26	157.54	159.2	92	IPI00497325.2	pck2 Zgc:77867	7955	246
27	154.67	157.13	90.2	IPI00506057.1	hsp90b1 Uncharacterized protein	7955	166
28	152.59	153.33	86.4	IPI00511483.1	eef2b Uncharacterized protein	7955	188
29	146.05	189.88	86.4	IPI00513242.3	myh11 Uncharacterized protein	7955	196
30	144.16	147.15	94.6	IPI00994508.1	- Uncharacterized protein	7955	237
31	143.59	144.38	89.9	IPI00972722.3	tfa Transferrin	7955	171
32	140.49	141	70.5	IPI00631543.4	dync1h1 Dynein cytoplasmic 1 heavy chain 1	7955	124
33	136.29	137.05	95.3	IPI00509533.6	pdia3 protein disulfide isomerase family A, member 3	7955	132
34	135.91	140.12	88.5	IPI00505750.3	hspa5 Uncharacterized protein	7955	194
35	135.42	138.59	90.4	IPI00508003.2	hspd1 Uncharacterized protein	7955	133
36	135.36	135.92	84.3	IPI00506192.2	ahcy Adenosylhomocysteinase	7955	203
37	134.46	135.25	86.5	IPI00773405.3	oxct1b Uncharacterized protein	7955	178
38	134.01	134.43	89.4	IPI00934288.1	mthfd1 Methylenetetrahydrofolate dehydrogenase	7955	136
39	131.48	133.16	88.2	IPI00497986.2	p4hb protein disulfide-isomerase	7955	138
40	130.63	132.58	96.3	IPI00637094.3	LOC792474;anxa4 Uncharacterized protein	7955	185
41	130.31	132.47	76.8	IPI00963174.1	si:dkey-76b14.4 Uncharacterized protein	7955	150
42	130.05	131.25	91.4	IPI00489732.4	suclg2 Uncharacterized protein	7955	126
43	128.01	128.57	80.4	IPI00995291.1	LOC567310 Uncharacterized protein	7955	130
44	127.26	130	99.8	IPI00500184.3	acaa2 Zgc:56036	7955	160
45	126.74	127.86	95.4	IPI00508365.2	pgk1 Phosphoglycerate kinase	7955	153
46	125.65	125.75	71.8	IPI00898876.2	flna Uncharacterized protein	7955	140
47	125.26	125.75	83.8	IPI00489722.3	adh8a Alcohol dehydrogenase 8a	7955	213
48	125.19	125.33	86.1	IPI00508338.1	actn4 Actn4	7955	122
49	124.46	125.06	94.9	IPI00852151.1	grhprb Uncharacterized protein	7955	167
50	122.58	122.97	91	IPI00502437.4	agxtb Uncharacterized protein	7955	215
51	120.5	120.6	80.5	IPI00804142.2	iqgap2 Uncharacterized protein	7955	113
52	114.98	115.26	76.4	IPI00512912.2	cltca clathrin, heavy polypeptide a	7955	135
53	114.48	114.48	81.3	IPI00862071.5	col1a1a Uncharacterized protein	7955	260
54	114.31	115.05	90.4	IPI00508477.1	ldhbb L-lactate dehydrogenase B-B chain	7955	143
55	113.89	128.63	90.8	IPI00932942.1	hspa8 HSC70 protein	7955	172
56	113.75	116.11	83.6	IPI00491598.2	hsp90ab1 Heat shock protein HSP 90-beta	7955	122
57	112.35	114.11	99.2	IPI00510828.2	mat1a S-adenosylmethionine synthase	7955	152
58	112.2	112.25	57.8	IPI00851793.5	si:ch211-93f2.1 Uncharacterized protein	7955	155
59	110.72	110.87	92.2	IPI00487988.2	pklr Pyruvate kinase	7955	128
60	109	109.16	67.7	IPI01023355.1	LOC559001 Uncharacterized protein	7955	113
61	108.23	108.38	98	IPI00493081.3	ba2;ba2l;ba1l;ba1 Hemoglobin subunit beta-1	7955	340
62	107.94	108.75	92.3	IPI00511623.2	got2a Aspartate aminotransferase	7955	127
63	107.26	107.4	81	IPI00971785.1	snd1 Uncharacterized protein	7955	103
64	106.43	106.51	73.2	IPI00507821.2	tln1 Uncharacterized protein	7955	89
65	106.35	106.43	79.9	IPI00496722.7	si:dkey-76k16.7 Uncharacterized protein	7955	99
66	106.32	106.35	62.8	IPI00860329.2	fn1b Uncharacterized protein	7955	90
67	104.83	105.02	84.7	IPI00502653.1	col1a2 Uncharacterized protein	7955	247
68	104.11	105.1	97	IPI00632486.4	pgm1 Phosphoglucomutase 1	7955	137
69	103.47	105.11	82.5	IPI01016831.1	acsf2 acyl-CoA synthetase family member 2, mitochondrial precursor	7955	131
70	102.96	103.17	81.5	IPI00481475.5	sardh Uncharacterized protein	7955	107
71	102.28	102.49	82.8	IPI00506482.3	fbp1b Uncharacterized protein	7955	163
72	102.03	174.15	86.9	IPI00570082.6	myh9 myosin, heavy polypeptide 9, non-muscle	7955	194
73	101.75	102.13	90.9	IPI00512371.1	aldh6a1 methylmalonate-semialdehyde dehydrogenase [acylating], mitochondrial	7955	132
74	101.42	106.18	94.3	IPI00513243.4	lmnb2 Uncharacterized protein	7955	94
75	100.4	106.43	75.6	IPI00486162.2	col1a1b Collagen, type I, alpha 3	7955	258
76	100.3	100.52	86	IPI00491770.1	si:xx-by187g17.1;hbaa1 Uncharacterized protein	7955	264
77	100.09	100.97	68.7	IPI00618707.6	flnbl filamin-B, partial	7955	103
78	99.5	102.62	91.9	IPI00481049.1	acat1 Acetyl-CoA acetyltransferase, mitochondrial	7955	118
79	98.08	98.39	82.4	IPI00505091.2	vcp Transitional endoplasmic reticulum ATPase	7955	95
80	97.32	98.1	95.1	IPI00506920.1	got1 Aspartate aminotransferase	7955	101
81	96.56	96.98	86.2	IPI00498510.1	tkt transketolase-like protein 2	7955	114
82	96.21	96.87	69.3	IPI00510350.6	ogdh Uncharacterized protein	7955	83
83	96.1	97.74	71.9	IPI00505730.2	atp1a1 ATPase, Na+/K+ transporting, alpha 1 polypeptide	7955	103
84	95.74	97.7	82.8	IPI01005149.1	ftcd formimidoyltransferase-cyclodeaminase	7955	105
85	95.26	96.73	96	IPI00499224.2	zgc:162356 Uncharacterized protein	7955	110
86	93.8	94.63	84.8	IPI00868406.1	hadha Uncharacterized protein	7955	106
87	93.21	96.21	75.4	IPI00507572.1	pdia4 Protein disulfide isomerase associated 4	7955	96
88	92.98	94.56	99.2	IPI00496071.2	fabp10a Fatty acid-binding protein 10-A, liver basic	7955	257
89	92.75	98.51	89.5	IPI00495240.1	mdh1a Malate dehydrogenase	7955	196
90	92.7	92.85	89	IPI00489824.2	hpx Hemopexin	7955	84
91	92.12	93.11	90.7	IPI00504274.1	hgd Uncharacterized protein	7955	119
92	91.97	99.1	94.3	IPI00492110.2	slc25a5 Uncharacterized protein	7955	109
93	91.87	92.02	77	IPI00617410.3	aco1 Iron regulatory protein 1	7955	70
94	91.32	91.5	81.8	IPI00934329.1	tubb2c Tubulin, beta, 2	7955	156
95	90.91	91.12	72.7	IPI00618299.5	LOC559212 1,4-alpha-glucan-branching enzyme-like	7955	115
96	90.54	95.47	80.6	IPI00898083.3	dspa desmoplakin	7955	85
97	90.24	92.53	79.2	IPI00502639.1	dpyd Dihydropyrimidine dehydrogenase [NADP+]	7955	96
98	90.13	90.28	83.1	IPI00975328.1	hdlbp Uncharacterized protein	7955	87
99	88.68	88.73	66.4	IPI01007542.1	acaca acetyl-CoA carboxylase isoform 2	7955	77
100	87.59	89.41	78.9	IPI00511660.7	dmgdh dimethylglycine dehydrogenase, mitochondrial	7955	93
101	87.39	89.43	86.2	IPI00487440.1	aldh4a1 Delta-1-pyrroline-5-carboxylate dehydrogenase, mitochondrial	7955	134
102	87.12	87.51	88.8	IPI00498056.5	shmt1 Serine hydroxymethyltransferase	7955	120
103	86.31	88.18	91.5	IPI00503480.4	zgc:193613 Zgc:193613	7955	141
104	85.64	86.02	84.8	IPI00835280.1	acadvl Acadvl protein	7955	77
105	85.14	86.44	94.5	IPI00494543.2	hsdl2 Hydroxysteroid dehydrogenase-like protein 2	7955	88
106	85.02	85.65	90.9	IPI00506014.4	hspa9 Heat shock protein 9	7955	96
107	84.85	100.41	91.9	IPI00489480.1	zgc:92533 Zgc:92533	7955	97
108	84.84	84.95	76	IPI01007423.1	LOC100006895 alpha-2-macroglobulin-like isoform 2	7955	93
109	84.4	87.74	79.3	IPI00961786.2	LOC100331428 complement C3-like	7955	107
110	83.79	88.74	89.2	IPI00506427.4	lmna Uncharacterized protein	7955	75
111	83.35	83.52	88.5	IPI00494197.1	hadhb Hydroxyacyl-Coenzyme A dehydrogenase/3-ketoacyl-Coenzyme A thiolase/enoyl-Coenzyme A hydratase (Trifunctional protein), beta subunit	7955	95
112	83.32	84.48	83.3	IPI00487495.4	pah Phenylalanine hydroxylase	7955	75
113	83.3	83.65	75.2	IPI00496979.2	uqcrc1 Uncharacterized protein	7955	101
114	83.25	85.19	95.3	IPI00650326.1	zgc:101846 Histone H2A	7955	107
115	82.98	83.18	81.7	IPI00487456.4	gpia Glucose-6-phosphate isomerase	7955	100
116	82.15	85.28	93.1	IPI00491168.3	LOC555748 Uncharacterized protein	7955	114
117	82.11	82.45	96.7	IPI00512157.1	zgc:64133 Malate dehydrogenase	7955	81
118	81.54	82.69	87.8	IPI00501169.2	fgb Uncharacterized protein	7955	79
119	81.35	82.3	100	IPI00482809.3	LOC100005308;LOC560685;LOC565277;LOC100003495;LOC560380;LOC100002181;LOC560162;LOC100004227;LOC570405;LOC100331412;LOC562770;wu:fe38f03;LOC100150038;LOC100005117;zgc:165555;LOC558274;LOC564352;LOC100332668;wu:fe37d09;LOC561044;LOC100333562;LOC100329358;LOC100333615;LOC564610;LOC794549 Histone H4	7955	126
120	80.81	81.72	79.3	IPI00483019.1	hyou1 Hypoxia up-regulated protein 1	7955	64
121	79.86	82.42	91.6	IPI00506249.4	ckba Zgc:154095	7955	83
122	79.84	80.32	76	IPI00612196.2	uba1 Ubiquitin-like modifier activating enzyme 1	7955	75
123	79.61	80.2	89.1	IPI00492989.1	tuba8l4 Uncharacterized protein	7955	92
124	79.18	79.7	79.9	IPI00507896.3	rpn1 Ribophorin I	7955	88
125	79.05	80.59	95.5	IPI00491828.3	- Histone H2B	7955	160
126	78.92	79.52	87	IPI00512800.1	ndrg1 Uncharacterized protein	7955	85
127	78.77	83.93	86.7	IPI00554351.4	rrbp1 Uncharacterized protein	7955	68
128	78.65	79.2	87.6	IPI00932261.2	calr Calr protein	7955	85
129	78.55	78.75	80.7	IPI00503256.2	ctnna Catenin (Cadherin-associated protein), alpha	7955	67
130	77.49	77.59	82	IPI00817143.2	gpt2l Isoform 1 of Alanine aminotransferase 2-like	7955	90
131	77.07	77.42	75.3	IPI00490730.6	LOC569348 GDH/6PGL endoplasmic bifunctional protein-like	7955	61
132	76.78	79.61	91.6	IPI00497275.1	agxta Alanine-glyoxylate aminotransferase, like	7955	113
133	75.42	77.05	80.9	IPI00512192.2	zgc:55856 Zgc:55856 protein	7955	71
134	75.03	76.71	78	IPI00483652.1	aco2 Aconitase 2, mitochondrial	7955	89
135	74.97	77.04	88	IPI00503163.2	abat 4-aminobutyrate aminotransferase, mitochondrial	7955	77
136	74.83	74.42	85.2	IPI00494823.6	ahnak Uncharacterized protein	7955	74
137	74.79	76.16	65.1	IPI00863633.3	abcb11b Uncharacterized protein	7955	91
138	74.5	75.9	83.9	IPI00498442.1	gdi2 Uncharacterized protein	7955	60
139	74.46	75.13	91.3	IPI00495740.1	uox Uricase	7955	80
140	73.82	87.63	75.2	IPI00505602.4	c3b Uncharacterized protein	7955	96
141	73.66	73.77	67.3	IPI00506519.3	cp Uncharacterized protein	7955	68
142	73.57	92.13	84.9	IPI00801488.4	zgc:158138 Zgc:158138 protein	7955	110
143	73.35	74.8	75	IPI00500510.2	mtp Microsomal triglyceride transfer protein	7955	78
144	72.88	74.86	94	IPI00634377.1	zgc:171719;tpm1 Uncharacterized protein	7955	48
145	72.2	72.82	85.3	IPI00481966.1	lcp1 Plastin-2	7955	54
146	71.81	76.14	80.1	IPI00507539.2	aldh9a1a Aldehyde dehydrogenase family 9 member A1-A	7955	73
147	71.73	73.43	81.8	IPI00995610.1	gpd1b Uncharacterized protein	7955	72
148	71.36	173.14	89.3	IPI00833472.2	pc Pc protein	7955	225
149	71.14	73.84	91.3	IPI00513003.2	ezrl Uncharacterized protein	7955	60
150	71.08	74.57	73.9	IPI00961343.2	LOC100331492 complement C3	7955	91
151	70.99	75.07	92.2	IPI00500902.4	g6pd Glucose-6-phosphate 1-dehydrogenase	7955	66
152	70.75	72.16	86	IPI00485582.4	ncl Zgc:152810 protein	7955	72
153	70.67	71.07	80.1	IPI00972721.1	- Uncharacterized protein (Fragment)	7955	67
154	70.46	70.79	77.6	IPI00482833.4	zgc:113006 Uncharacterized protein	7955	73
155	69.96	72.75	68.3	IPI00962153.1	chdh choline dehydrogenase, mitochondrial-like	7955	78
156	69.27	69.56	85.9	IPI00498284.1	fgg Uncharacterized protein	7955	60
157	68.68	68.87	74	IPI00512984.5	eprs Uncharacterized protein	7955	62
158	67.94	68.54	63.9	IPI00963079.2	col12a1 collagen alpha-1(XII) chain	7955	64
159	67.72	68.82	85.3	IPI00810069.3	idh1 Isocitrate dehydrogenase	7955	82
160	67.43	68.03	80.1	IPI00502496.1	ehhadh Peroxisomal bifunctional enzyme	7955	49
161	67.36	69.3	95.5	IPI00628282.3	gstt1a Uncharacterized protein	7955	118
162	66.95	68.23	81.8	IPI00635755.1	acat2 Uncharacterized protein	7955	96
163	66.93	67.65	74.5	IPI00773681.2	hp1bp3 Uncharacterized protein	7955	54
164	66.82	67.32	98	IPI00513166.1	rgn Regucalcin	7955	81
165	66.76	68.92	77.2	IPI00487194.4	fga fibrinogen alpha chain	7955	56
166	66.62	67.27	86.2	IPI00554392.3	acadm Uncharacterized protein	7955	72
167	65.99	66.66	82.6	IPI00491587.2	pgd 6-phosphogluconate dehydrogenase, decarboxylating	7955	63
168	65.84	66.48	82.2	IPI00489212.4	eif3s10 Eukaryotic translation initiation factor 3 subunit A	7955	74
169	65.74	66.46	73.8	IPI00482591.1	aclya ATP citrate lyase	7955	53
170	65.71	66.53	64.5	IPI00484212.2	anxa11b Annexin A11b	7955	55
171	65.34	66.2	78.4	IPI00505507.4	upb1 Ureidopropionase, beta	7955	68
172	65.19	68.15	91.7	IPI00505526.1	rpl4 Uncharacterized protein	7955	70
173	64.51	75.7	87.1	IPI00611213.2	lmnb1 Uncharacterized protein	7955	69
174	64.4	66.49	93.8	IPI00502668.2	gstp1 glutathione S-transferase pi	7955	88
175	64.05	66.46	87.9	IPI00497960.2	yars Tyrosyl-tRNA synthetase, cytoplasmic	7955	41
176	63.9	64.2	95.3	IPI00512573.1	prdx6 Uncharacterized protein	7955	61
177	63.8	64.49	80.7	IPI00497707.1	wdr1 WD repeat domain 1	7955	46
178	63.36	63.42	87.4	IPI00494761.3	fah Fumarylacetoacetate hydrolase	7955	80
179	63.34	71.38	89.6	IPI00972663.1	shmt2 Uncharacterized protein (Fragment)	7955	84
180	63.3	63.64	99.5	IPI00482908.3	prdx2 Uncharacterized protein	7955	82
181	63.28	63.6	98.7	IPI00490809.1	sod1 Superoxide dismutase [Cu-Zn]	7955	108
182	62.89	64.33	94	IPI00863600.2	agxt2 Zgc:114195	7955	74
183	62.78	62.98	82.7	IPI00507097.1	gnb2l1 Guanine nucleotide-binding protein subunit beta-2-like 1	7955	57
184	62.66	63.34	86.6	IPI00503103.2	cyp2j28 Cyp2j28 protein	7955	68
185	62.42	62.69	74.2	IPI00799748.1	zgc:153034 Zgc:153034	7955	62
186	62.41	63.49	74.2	IPI00892413.1	dpys Uncharacterized protein	7955	62
187	62.27	62.98	68.4	IPI00509057.4	copa Coatomer protein complex subunit alpha	7955	54
188	61.95	62.27	74	IPI00798912.2	me1;LOC100334383 Malic enzyme	7955	65
189	61.89	63.15	89.6	IPI00488038.1	fh Fumarate hydratase, mitochondrial	7955	69
190	61.85	63.9	85.8	IPI00504336.2	adka Uncharacterized protein	7955	63
191	61.67	66.42	83.7	IPI00483912.1	rdh1l Retinol dehydrogenase 1, like	7955	58
192	61.62	62.52	82.9	IPI00511925.3	rpl3 Uncharacterized protein	7955	49
193	61.56	62.25	81.1	IPI00490234.2	cct8 Chaperonin containing TCP1, subunit 8	7955	49
194	61.31	62.24	86.2	IPI00483560.1	anxa3b annexin A3b	7955	44
195	61.09	61.35	83.5	IPI00616809.1	a1cf APOBEC1 complementation factor isoform 2	7955	61
196	61.07	61.85	86.3	IPI01016971.1	kmo kynurenine 3-monooxygenase	7955	68
197	61.01	97.2	80.1	IPI00834037.2	krt4 Type II basic cytokeratin	7955	138
198	60.76	71.07	85.1	IPI00511127.4	zgc:153629 Zgc:153629	7955	75
199	60.16	60.98	86.1	IPI00955573.1	gcat 2-amino-3-ketobutyrate coenzyme A ligase, mitochondrial	7955	55
200	60.12	60.37	77.5	IPI00498786.2	suclg1 Succinate-CoA ligase, GDP-forming, alpha subunit	7955	105
201	59.83	60.59	93.3	IPI00510668.3	rps3a 40S ribosomal protein S3a	7955	57
202	59.7	62.31	99.6	IPI00484161.2	tpi1b Triosephosphate isomerase B	7955	74
203	59.49	59.91	78.6	IPI00972523.1	eef1g Elongation factor 1-gamma	7955	47
204	59.14	59.87	93.9	IPI00507986.1	rps3 Uncharacterized protein	7955	54
205	59.03	59.37	61	IPI00493061.2	scp2 Uncharacterized protein	7955	51
206	58.97	63.64	98.5	IPI00774978.2	LOC100004336 hypothetical protein LOC100004336	7955	57
207	58.94	59.63	86.7	IPI00507846.1	gnmt Glycine N-methyltransferase	7955	85
208	58.74	59.75	52.1	IPI00859328.3	LOC565797 Uncharacterized protein	7955	52
209	58.72	60.92	85.1	IPI00512330.2	hadh Uncharacterized protein	7955	61
210	58.65	59.32	66	IPI00963454.1	ganab neutral alpha-glucosidase AB-like	7955	44
211	58.62	59.25	69.9	IPI00497488.4	man2a1 Uncharacterized protein	7955	47
212	58.55	58.95	74.9	IPI01016741.1	serpina1 Serpina1 protein (Fragment)	7955	56
213	58.49	59	82	IPI00615875.4	LOC558239 Uncharacterized protein	7955	48
214	58.46	59.61	74.9	IPI00485280.2	pabpc1a Poly A binding protein, cytoplasmic 1 a	7955	49
215	58.23	60.18	80.7	IPI00817490.2	cpt2 carnitine O-palmitoyltransferase 2, mitochondrial	7955	48
216	57.93	58.16	81.5	IPI00771899.2	acox1 Acyl-coenzyme A oxidase	7955	54
217	57.89	58.32	84.7	IPI00489852.2	immt Uncharacterized protein	7955	46
218	57.87	58.08	79.6	IPI00501244.2	jup Junction plakoglobin	7955	54
219	57.71	58.36	99.4	IPI00484712.2	atp5h Uncharacterized protein	7955	69
220	57.11	57.92	73.8	IPI00639577.4	copb1 Coatomer subunit beta	7955	47
221	56.99	57.61	81.3	IPI00502344.1	eif4a1a eukaryotic translation initiation factor 4A, isoform 1A	7955	49
222	56.97	57.53	65.6	IPI00487534.3	hexb Uncharacterized protein	7955	45
223	56.82	57.13	71.3	IPI00488263.2	aars Uncharacterized protein	7955	51
224	56.76	57.57	77.5	IPI00483375.2	aldh7a1 Uncharacterized protein	7955	73
225	56.64	57.03	80.7	IPI00510836.4	fmo5 Fmo5 protein	7955	64
226	56.61	57.75	88.2	IPI00493144.3	rps4x 40S ribosomal protein S4, X isoform	7955	35
227	56.59	57.76	82.1	IPI00511624.5	pcca Propionyl-Coenzyme A carboxylase, alpha polypeptide	7955	45
228	56.19	58.98	79.4	IPI00804188.3	LOC100006023 Uncharacterized protein	7955	59
229	56.14	57.09	76.1	IPI00487665.1	cct3 Uncharacterized protein	7955	44
230	56.02	57.63	86.5	IPI01023637.1	xirp2a Uncharacterized protein	7955	41
231	55.94	61.89	78.4	IPI00774469.1	zgc:136367 Zgc:136367	7955	41
232	55.75	56.27	82.5	IPI00496195.2	atp5f1 Uncharacterized protein	7955	76
233	55.53	56.4	75.4	IPI00772079.5	LOC564077 Uncharacterized protein	7955	72
234	55.48	56.01	74.2	IPI00501589.4	uqcrc2 Ubiquinol-cytochrome c reductase core protein II	7955	62
235	54.78	54.97	77.6	IPI00897561.10	acadl Uncharacterized protein	7955	60
236	54.76	55.14	85.7	IPI00484255.3	acaa1 Uncharacterized protein	7955	64
237	54.54	55.03	79.2	IPI00497681.2	zgc:92630 Uncharacterized protein	7955	62
238	54.4	55.03	85.9	IPI00490232.4	ckmt1 Uncharacterized protein	7955	49
239	54.37	64.93	86.5	IPI00618655.6	si:ch211-133j6.3 Uncharacterized protein	7955	60
240	54.15	54.68	94.3	IPI00495830.1	apoa1 Apolipoprotein A-I	7955	50
241	54.11	54.89	78.1	IPI00773529.4	zgc:63480 Uncharacterized protein	7955	52
242	53.71	54.51	80.1	IPI00510954.1	mao Amine oxidase [flavin-containing]	7955	55
243	53.39	53.75	69	IPI01023461.1	col6a3 collagen alpha-3(VI) chain	7955	55
244	53.35	54.31	89.9	IPI01024243.1	rplp0 Uncharacterized protein	7955	51
245	53.29	54.18	64.7	IPI00495077.8	tpp2 Uncharacterized protein	7955	45
246	53.14	54.92	81	IPI00504625.2	syncrip Uncharacterized protein	7955	51
247	53.06	53.35	81.2	IPI00961787.1	mvp Uncharacterized protein	7955	44
248	52.94	72.04	86.6	IPI00510383.1	pls3 Uncharacterized protein	7955	69
249	52.77	53.14	82.3	IPI00512019.2	ugt1a1;ugt1ab UDP glucuronosyltransferase 1 family polypeptide a3 precursor	7955	55
250	52.59	53.41	80.2	IPI00505928.1	cct2 Chaperonin containing TCP1, subunit 2	7955	39
251	52.44	54.25	92.2	IPI00993110.1	etfa Uncharacterized protein	7955	50
252	52.12	55.8	74.7	IPI00972514.1	cyp2j22 Uncharacterized protein	7955	44
253	52.11	53.15	74.6	IPI00511115.1	ap2b1 Uncharacterized protein	7955	45
254	52.06	52.35	67.4	IPI00960999.3	gcn1l1 translational activator GCN1	7955	59
255	52.05	57.27	82	IPI00500416.1	idh2 Isocitrate dehydrogenase	7955	42
256	51.99	52.38	81.3	IPI00836013.1	cbsa Uncharacterized protein	7955	40
257	51.91	51.99	74	IPI00507226.7	aass aminoadipate-semialdehyde synthase	7955	41
258	51.7	53.7	81.4	IPI00481235.1	pdcd8 Pdcd8 protein	7955	47
259	51.62	53.65	73	IPI00503338.1	canx Zgc:63524	7955	54
260	51.32	53.21	80.4	IPI00495614.1	taldo1 Transaldolase	7955	48
261	51.31	51.8	76.7	IPI00633223.2	selenbp1 Uncharacterized protein	7955	48
262	51.28	62.93	81.5	IPI00494446.1	msna Uncharacterized protein	7955	46
263	51.2	51.63	64	IPI00487448.2	copb2 Uncharacterized protein	7955	41
264	51.06	53.01	79.2	IPI00492705.1	ephx1 Zgc:56126	7955	55
265	50.85	50.92	81.5	IPI00914423.1	zgc:123103 Zgc:123103	7955	43
266	50.77	53.16	70	IPI00495382.2	retsat Putative all-trans-retinol 13,14-reductase	7955	50
267	50.73	50.97	82.3	IPI00804982.1	zgc:153346 Glycerate kinase	7955	35
268	50.71	50.99	79	IPI00487872.2	sdha Succinate dehydrogenase [ubiquinone] flavoprotein subunit, mitochondrial	7955	42
269	50.63	51.24	85.6	IPI00510069.1	etfdh Zgc:92093	7955	63
270	50.59	50.88	87.2	IPI00931488.1	zgc:85789 Ester hydrolase C11orf54 homolog	7955	42
271	50.51	52.24	67.9	IPI00829266.2	aldh16a1 Uncharacterized protein	7955	45
272	50.44	51.78	78.8	IPI00637460.2	mccc2 Methylcrotonoyl-Coenzyme A carboxylase 2	7955	46
273	50.33	50.96	66.5	IPI00486090.6	lonp1 Lon protease homolog	7955	46
274	50.2	54.8	82.1	IPI00489851.2	aldh8a1 Aldehyde dehydrogenase family 8 member A1	7955	51
275	50.17	50.79	80.7	IPI00500466.2	ndufs1 NADH dehydrogenase (Ubiquinone) Fe-S protein 1	7955	57
276	49.94	51.73	67.6	IPI00509740.1	zgc:103585 3-hydroxyanthranilate 3,4-dioxygenase	7955	55
277	49.86	50.03	93.2	IPI00914375.2	sord sorbitol dehydrogenase	7955	53
278	49.52	50.82	77.6	IPI00498630.2	cct5 Uncharacterized protein	7955	38
279	49.52	60.87	80.7	IPI00616129.2	zgc:198195 Uncharacterized protein	7955	38
280	49.5	50.17	65.7	IPI00506379.6	kpnb3 Uncharacterized protein	7955	42
281	49.47	49.57	71.9	IPI00898898.1	snx1 Snx1 protein	7955	37
282	49.19	49.44	81.4	IPI00483251.2	amt Aminomethyltransferase	7955	43
283	48.87	49.38	78.6	IPI00844973.1	hal Histidine ammonia-lyase	7955	55
284	48.53	49.11	78.8	IPI00512880.2	nop58 Nop58 protein	7955	35
285	48.12	48.89	85.4	IPI00851926.2	vdac3 Uncharacterized protein	7955	60
286	48.1	48.4	73.4	IPI00485772.1	zgc:92030 Zgc:92030	7955	32
287	47.98	49.92	92.2	IPI00498898.1	ywhabb 14-3-3 protein beta/alpha-B	7955	59
288	47.98	48.67	82.9	IPI00972631.1	upp1 Uncharacterized protein	7955	45
289	47.94	48.46	89.1	IPI00507561.3	agmat Zgc:153353	7955	58
290	47.87	48.47	76.2	IPI00487216.1	hspa4a Uncharacterized protein	7955	41
291	47.72	48	98.2	IPI00482761.2	gstm Uncharacterized protein	7955	57
292	47.58	50.88	77.9	IPI00480990.2	rars Arginyl-tRNA synthetase	7955	31
293	47.54	48.81	98.5	IPI00484825.2	akr1a1a Alcohol dehydrogenase [NADP+] A	7955	41
294	47.49	48.26	70	IPI00506005.3	psmd1 Proteasome (Prosome, macropain) 26S subunit, non-ATPase, 1	7955	39
295	47.49	48.21	80.4	IPI00516121.1	ephx2 Epoxide hydrolase 2, cytoplasmic	7955	43
296	47.48	47.87	71	IPI00632161.2	ppp2r1a Uncharacterized protein	7955	38
297	47.37	49.92	99.3	IPI00491514.1	fabp3 Uncharacterized protein	7955	58
298	47.35	48.61	73.1	IPI00507875.1	psmd2 Proteasome (Prosome, macropain) 26S subunit, non-ATPase, 2	7955	47
299	47.18	47.75	73.9	IPI00932981.1	zgc:63667 Zgc:63667	7955	37
300	47.17	47.28	57.1	IPI00487484.4	xdh Uncharacterized protein	7955	40
301	46.94	47.61	89.8	IPI00500119.1	ppib Peptidyl-prolyl cis-trans isomerase	7955	52
302	46.92	47.32	89.8	IPI00501341.4	zgc:92502 Zgc:92502	7955	41
303	46.91	47.06	67.3	IPI00507818.1	iars Isoleucyl-tRNA synthetase	7955	40
304	46.68	49.17	95.8	IPI00499748.5	gpx1a glutathione peroxidase 1	7955	65
305	46.65	47.79	71.8	IPI00508284.1	rpsa 40S ribosomal protein SA	7955	48
306	46.48	48.57	66.1	IPI00484135.7	acmsd Acmsd protein	7955	45
307	46.39	48.54	78.7	IPI00809541.1	dars Zgc:154056	7955	35
308	46.34	46.8	71.6	IPI00491239.3	npepps Uncharacterized protein	7955	38
309	46.26	46.51	61.1	IPI00493235.3	atp2a2b Uncharacterized protein	7955	44
310	46.18	46.39	84.2	IPI00489033.1	cahz Carbonic anhydrase	7955	52
311	46.14	46.49	70.2	IPI00495887.1	hsd17b4 Hsd17b4 protein	7955	36
312	46	46.57	75.9	IPI00615919.1	pdip5 Protein disulfide isomerase-related protein	7955	47
313	45.95	46.34	76	IPI00501350.2	zgc:110783 MOSC domain-containing protein 1, mitochondrial	7955	40
314	45.91	46.72	82.7	IPI00492814.2	etfb Etfb protein	7955	37
315	45.84	46.3	97.9	IPI01007321.1	flna filamin-A-like, partial	7955	40
316	45.75	46.2	79	IPI00480914.3	ddost Uncharacterized protein	7955	38
317	45.59	47.38	75.8	IPI00865448.2	LOC564844 malate synthase-like	7955	36
318	45.52	45.78	65.3	IPI00489821.2	ilf3 Interleukin enhancer-binding factor 3 homolog	7955	44
319	45.44	46.71	79.3	IPI00656499.2	hmgb2 Uncharacterized protein	7955	28
320	45.4	45.7	71.6	IPI00488773.1	slc25a12 Solute carrier family 25 (Mitochondrial carrier, Aralar), member 12	7955	29
321	45.34	45.82	98.1	IPI00483070.2	atp5o Uncharacterized protein	7955	52
322	45.33	46.47	77.1	IPI00501561.1	zgc:66127 Zgc:66127	7955	43
323	45.29	76.03	81.8	IPI00512534.5	calrl Calreticulin like	7955	63
324	45.2	47.7	83	IPI00489936.2	zgc:64106 Uncharacterized protein	7955	50
325	44.95	46.2	74.9	IPI00486103.1	cpne1 Uncharacterized protein	7955	44
326	44.8	45.13	87.2	IPI00503812.2	gamt Guanidinoacetate N-methyltransferase	7955	64
327	44.26	45.38	90.3	IPI00511901.1	rplp1 Uncharacterized protein	7955	42
328	44.2	44.89	81.4	IPI00492829.6	rpl5b Uncharacterized protein	7955	41
329	44.2	44.35	71.1	IPI00509272.2	rpn2 Uncharacterized protein (Fragment)	7955	43
330	44.15	44.38	51.4	IPI00817827.1	slc4a1 Solute carrier family 4, anion exchanger, member 1	7955	42
331	44.12	44.24	68.8	IPI00807067.2	mut Uncharacterized protein	7955	34
332	43.84	43.91	67.9	IPI00859805.3	pccb Uncharacterized protein	7955	32
333	43.76	45.09	82.3	IPI00497855.1	tcp1 T-complex protein 1 subunit alpha	7955	38
334	43.7	43.96	75.5	IPI00773562.1	ugdh Uncharacterized protein	7955	28
335	43.63	47.07	86.4	IPI00962132.1	LOC100329422 histone H3.2-like	7955	48
336	43.54	44.16	87.5	IPI00491385.1	psmc2 Uncharacterized protein	7955	34
337	43.52	43.7	84.7	IPI00511820.2	decr1 Uncharacterized protein	7955	51
338	43.46	43.98	81.6	IPI00483581.3	cap1 Adenylyl cyclase-associated protein	7955	36
339	43.45	44.13	72.4	IPI00507696.1	crata Zgc:92317	7955	47
340	43.31	43.67	76.2	IPI00506233.4	lrpprc Uncharacterized protein	7955	42
341	43.22	43.58	95.2	IPI00972490.1	phb Uncharacterized protein	7955	41
342	43.2	44.38	92.1	IPI00629993.2	LOC792137;cbr1l Uncharacterized protein	7955	40
343	43.1	43.23	74.8	IPI00497503.3	zgc:110692 Cytochrome P450 CYP2Y3	7955	36
344	42.7	43.32	90.2	IPI00498671.4	hao1 Hao1 protein	7955	31
345	42.57	45.26	79.5	IPI00932245.1	LOC559969 Uncharacterized protein	7955	38
346	42.55	43.16	72.6	IPI00631948.2	allc Isoform 2 of Allantoicase	7955	41
347	42.36	42.46	89.5	IPI01006620.1	LOC100332749;serbp1 Uncharacterized protein	7955	34
348	42.28	44.21	86.6	IPI00505335.3	ppa1 Uncharacterized protein	7955	38
349	42.16	42.59	86.6	IPI00502389.1	echs1 Uncharacterized protein	7955	38
350	42.15	42.41	71.6	IPI00972305.1	qars Uncharacterized protein	7955	30
351	41.99	42.33	69.2	IPI00612749.2	hkdc1 Uncharacterized protein	7955	30
352	41.91	71.47	89.3	IPI00864156.3	krt15 Uncharacterized protein (Fragment)	7955	66
353	41.87	42.03	67.9	IPI00495281.1	gys2 Uncharacterized protein	7955	43
354	41.77	42.2	92.7	IPI00511345.2	cfl1 Uncharacterized protein	7955	46
355	41.67	41.99	76.7	IPI00511568.2	dldh Dihydrolipoyl dehydrogenase	7955	44
356	41.61	43.88	60.4	IPI00960682.2	LOC568102 Uncharacterized protein	7955	45
357	41.5	41.56	52.6	IPI00508462.2	nnt Uncharacterized protein	7955	40
358	41.35	42.58	77.9	IPI00632609.2	sars Uncharacterized protein	7955	31
359	41.34	41.58	70.4	IPI00509716.2	amdhd1 Probable imidazolonepropionase	7955	35
360	41.3	42.63	91.5	IPI00806146.3	LOC795332 tricarboxylate transport protein, mitochondrial	7955	35
361	41.29	42.38	86.4	IPI00497489.1	zgc:92869 Zgc:92869	7955	58
362	41.27	42.81	73.4	IPI00865054.2	LOC100330160 Uncharacterized protein	7955	28
363	41.16	42.45	96.6	IPI00490915.3	mb Myoglobin	7955	28
364	41.05	42.3	87.2	IPI00488350.1	cox5aa;LOC100537689 Uncharacterized protein	7955	46
365	41.04	41.25	73.4	IPI00484500.4	atp6v1al Uncharacterized protein	7955	36
366	40.82	40.98	72.2	IPI00962003.2	dhtkd1 Uncharacterized protein	7955	46
367	40.8	40.9	61.6	IPI00500755.3	plg Plasminogen	7955	34
368	40.6	40.71	70.9	IPI01023403.1	usp5 Ubiquitin carboxyl-terminal hydrolase	7955	29
369	40.54	40.67	82	IPI00487369.2	zgc:101598 Zgc:101598	7955	42
370	40.48	40.91	85.7	IPI00513087.1	zgc:92453 Zgc:92453	7955	36
371	40.44	42.39	92.7	IPI00493442.1	rbm4.3 hypothetical protein LOC406277	7955	43
372	40.39	41.33	62.3	IPI00817796.1	cyp4 Uncharacterized protein	7955	31
373	40.36	41.08	97.4	IPI00933112.1	ybx1 Y box binding protein 1	7955	49
374	40.22	41.06	95	IPI00851355.2	dera 2-deoxyribose-5-phosphate aldolase homolog	7955	25
375	40.18	40.64	87	IPI00509016.2	pgam1a Phosphoglycerate mutase	7955	61
376	40.07	40.17	81.1	IPI00483355.1	zgc:77439 dimethylanaline monooxygenase-like	7955	29
377	40.05	41.34	82.7	IPI00482363.2	pa2g4b Uncharacterized protein	7955	34
378	40.03	42.07	78.8	IPI00500949.5	anxa1a Annexin A1a	7955	28
379	39.97	41.95	51.6	IPI00897295.2	huwe1 Uncharacterized protein	7955	41
380	39.91	40.48	64.3	IPI00495942.3	copg2 Isoform 1 of Coatomer subunit gamma-2	7955	29
381	39.85	40.53	85.8	IPI00502842.1	flot2a Isoform 1 of Flotillin-2a	7955	27
382	39.8	43.07	71.8	IPI00786528.2	pter Phosphotriesterase-related protein	7955	34
383	39.71	40.31	82.3	IPI00931220.2	LOC100534658 Uncharacterized protein	7955	26
384	39.68	42.91	68.2	IPI00963239.3	zgc:103715 Aldehyde dehydrogenase	7955	41
385	39.67	163.08	93.4	IPI00923784.1	aldh2a Aldehyde dehydrogenase 2	7955	224
386	39.65	42.86	86.6	IPI00497676.3	vdac2 Voltage-dependent anion channel 2	7955	61
387	39.61	41.13	85.7	IPI00495318.4	psmc1b Uncharacterized protein	7955	34
388	39.47	41.61	67.8	IPI00507285.2	cct7 Uncharacterized protein	7955	32
389	39.32	66.27	83	IPI00509500.2	aldoaa Fructose-bisphosphate aldolase	7955	79
390	39.32	41.39	80.2	IPI00801770.4	eif3b Uncharacterized protein	7955	36
391	39.25	43.02	78	IPI00516132.1	zgc:101847 Protein NDRG2	7955	40
392	39.22	39.98	67.7	IPI00482211.4	si:dkey-276i5.1 glycyl-tRNA synthetase	7955	30
393	39.02	170.78	86.6	IPI00961738.2	wu:fd14a01 myosin heavy chain, fast skeletal muscle	7955	157
394	38.99	40.24	89.5	IPI00512690.2	stip1 Uncharacterized protein	7955	35
395	38.93	39.01	85	IPI00483337.3	pl10 Putative RNA helicase	7955	34
396	38.88	39.8	88.8	IPI00817732.1	psmc3 Uncharacterized protein	7955	33
397	38.86	41.35	67.8	IPI00570064.1	actr2b Actin-related protein 2-B	7955	42
398	38.84	39.35	86.9	IPI00507046.1	psmd3 Uncharacterized protein	7955	27
399	38.8	40.69	59	IPI00502046.4	cand1 Uncharacterized protein	7955	41
400	38.8	41.58	89.9	IPI00512109.1	anxa2a Uncharacterized protein	7955	40
401	38.67	42.27	87.1	IPI00501947.1	phb2 Uncharacterized protein	7955	43
402	38.61	39.91	100	IPI00501400.1	zgc:92739 heat-responsive protein 12-like isoform 1	7955	70
403	38.51	38.94	83.7	IPI00505092.1	ran GTP-binding nuclear protein Ran	7955	31
404	38.46	74.81	81.1	IPI00633215.3	pygb Phosphorylase	7955	75
405	38.36	118.61	91	IPI00490182.3	glud1a Uncharacterized protein	7955	175
406	38.32	38.66	68.8	IPI00513317.1	nap1l1 Uncharacterized protein	7955	31
407	38.19	39.46	80.6	IPI00481177.2	zgc:103601 Zgc:103601	7955	30
408	38.15	39.93	89	IPI00500824.5	rpl7 Ribosomal protein L7	7955	35
409	38.14	38.25	76.4	IPI00503357.6	wu:fc76b04 Uncharacterized protein	7955	35
410	38.1	39.33	92.3	IPI00505260.3	cox4i1 Cytochrome c oxidase subunit IV isoform 1	7955	46
411	37.74	84	78	IPI01023905.1	myh11 Uncharacterized protein	7955	94
412	37.72	38.01	86.7	IPI00801939.1	zgc:152830 Zgc:152830	7955	29
413	37.72	37.86	68	IPI00829307.2	acss1 acyl-CoA synthetase short-chain family member 1	7955	29
414	37.71	43.37	100	IPI00483862.1	zgc:77734 diazepam binding inhibitor	7955	51
415	37.71	39.37	78.4	IPI00499836.5	papss2a Zgc:153748	7955	27
416	37.69	39	100	IPI00510181.2	rps27a Zgc:66168	7955	34
417	37.65	39.08	91.5	IPI00500626.3	rpl13 60S ribosomal protein L13	7955	32
418	37.64	38.36	76.8	IPI00506729.3	actr3 ARP3 actin-related protein 3-like protein	7955	30
419	37.58	37.75	84.2	IPI00506191.3	try Uncharacterized protein	7955	37
420	37.54	78.66	90.5	IPI00758877.1	zgc:109868 Zgc:109868	7955	74
421	37.5	37.67	67.3	IPI00513559.4	abcc2 ATP-binding cassette, sub-family C (CFTR/MRP), member 2	7955	36
422	37.49	37.84	65.1	IPI00491600.5	ap2a1 AP-2 complex subunit alpha-2-like isoform 1	7955	35
423	37.49	38.73	85.8	IPI00505391.2	anxa5b Anxa5b protein	7955	23
424	37.45	38.01	70.1	IPI00488732.3	agxt2l1 Alanine--glyoxylate aminotransferase 2-like 1	7955	47
425	37.37	37.67	73	IPI00484190.1	acox3 Acyl-coenzyme A oxidase	7955	39
426	37.26	37.31	62	IPI00608684.4	wu:fb63a09 Uncharacterized protein	7955	36
427	37.25	37.94	75.8	IPI00489785.1	zgc:77049 Zgc:77049	7955	28
428	37.24	38.26	72.9	IPI00503562.1	zgc:92406 Zgc:92406	7955	29
429	37.23	37.96	79.1	IPI00836352.3	lman1 protein ERGIC-53	7955	36
430	37.19	37.66	83.8	IPI00500018.3	sult1st6 Sult1 isoform 6	7955	39
431	37.19	40.1	77.5	IPI00503751.6	pdia5 Uncharacterized protein	7955	35
432	37.11	37.72	78	IPI00499674.1	serpina7 Serpin peptidase inhibitor, clade A (Alpha-1 antiproteinase, antitrypsin), member 7	7955	35
433	37.11	37.29	79.4	IPI00506951.1	pdhb Uncharacterized protein	7955	35
434	37.08	37.32	82.6	IPI01005282.1	ndufv3 hypothetical protein LOC797946	7955	27
435	37.01	37.81	71.1	IPI00972276.1	c9 Uncharacterized protein	7955	27
436	36.92	37.14	76.9	IPI00511575.2	pgm2 Uncharacterized protein	7955	31
437	36.87	38.81	95.8	IPI00502755.3	flot1b Uncharacterized protein	7955	33
438	36.84	40.58	71.6	IPI01006052.1	LOC569661 hypothetical protein LOC569661 isoform 2	7955	32
439	36.82	39.37	73.3	IPI00487971.3	gfpt1 Glutamine-fructose-6-phosphate transaminase 1	7955	30
440	36.81	37.05	87.5	IPI00492127.2	eif2s2 Eukaryotic translation initiation factor 2, subunit 2 beta	7955	30
441	36.72	37.71	79.5	IPI00502168.1	hnrnpa0 Hnrpa0 protein (Fragment)	7955	34
442	36.67	42.67	89.3	IPI00497049.2	zgc:162396 Zgc:162396 protein	7955	28
443	36.67	36.75	62.3	IPI00832505.4	usp7 Uncharacterized protein	7955	26
444	36.63	37.45	98.3	IPI00773429.2	rplp2l Uncharacterized protein	7955	39
445	36.42	36.47	65.8	IPI00919714.2	zgc:158450 Uncharacterized protein	7955	34
446	36.29	36.35	62.5	IPI00489091.6	zgc:194768 Zgc:194768	7955	31
447	36.24	37.18	92.8	IPI00506214.1	ssb Uncharacterized protein	7955	25
448	36.17	53.93	79.5	IPI01016809.1	- Uncharacterized protein	7955	55
449	36.13	73.64	71.2	IPI00482413.7	sb:cb37 alpha-2-macroglobulin	7955	82
450	36.13	36.78	71	IPI00510085.2	ddx39a Ddx39a protein	7955	32
451	36.09	38.71	73	IPI00506328.2	bscv Adipocyte plasma membrane-associated protein	7955	34
452	35.96	36.7	85.3	IPI00994952.1	zgc:153867 Uncharacterized protein	7955	44
453	35.92	41.6	86.9	IPI00498091.6	h2afy2;LOC100536875 Histone H2A	7955	35
454	35.9	36.03	69.9	IPI00493149.3	erp44 Uncharacterized protein	7955	26
455	35.76	38.91	80.3	IPI00508585.1	mxe Interferon-induced GTP-binding protein MxE	7955	33
456	35.74	36.35	84.4	IPI00491508.2	eif2s1 eIF2 alpha subunit	7955	27
457	35.74	36.53	79.1	IPI00507898.4	slc27a6 Solute carrier family 27 (Fatty acid transporter), member 6	7955	23
458	35.72	53.9	76.6	IPI00503318.3	adh8b Uncharacterized protein	7955	61
459	35.71	47.51	99.6	IPI00487033.2	ywhae2 Uncharacterized protein	7955	49
460	35.66	37.81	74.1	IPI00864573.1	psmd13 Uncharacterized protein	7955	22
461	35.63	36.38	55.8	IPI00512526.6	gldc Uncharacterized protein	7955	41
462	35.55	35.83	79.7	IPI00485171.4	tufm Elongation factor Tu	7955	35
463	35.54	35.86	77.6	IPI00612423.4	LOC555902 Uncharacterized protein	7955	25
464	35.53	35.76	80.7	IPI00618959.2	si:ch211-149g8.3 Oxysterol-binding protein	7955	23
465	35.4	36.89	93.6	IPI00494226.1	psme1 Uncharacterized protein	7955	29
466	35.31	44.83	72.9	IPI00501493.2	anxa11a Uncharacterized protein	7955	38
467	35.28	37.08	83.4	IPI00502705.2	tomm70a Uncharacterized protein	7955	33
468	35.25	36.3	70.7	IPI00500568.2	scinlb Uncharacterized protein	7955	39
469	35.23	37.53	69.9	IPI00491177.8	LOC100151110 5-oxoprolinase	7955	33
470	35.2	37.55	72.7	IPI00806987.3	zgc:153296 Zgc:153296	7955	31
471	35.17	35.37	81.2	IPI00997392.1	sult2st2 Uncharacterized protein	7955	41
472	35.11	35.46	78.5	IPI00505502.2	gcdh Uncharacterized protein	7955	47
473	35.11	35.88	97.7	IPI01024336.1	lgals2b Uncharacterized protein	7955	58
474	35.08	35.51	71.2	IPI00497750.4	si:dkey-91i10.3 Uncharacterized protein	7955	26
475	35.08	35.52	70.9	IPI00971625.1	uso1 Uncharacterized protein	7955	30
476	35.04	35.22	62.9	IPI00508405.4	acad11 Acyl-Coenzyme A dehydrogenase family, member 11	7955	27
477	35.01	36.36	77.2	IPI00995035.1	cct6a Uncharacterized protein	7955	30
478	35	37.27	59.9	IPI01023377.1	si:ch211-207o17.2 Uncharacterized protein (Fragment)	7955	30
479	34.98	35.28	71.5	IPI00484651.2	abcf1 Uncharacterized protein	7955	21
480	34.88	35.38	75.7	IPI00505708.2	dpp3 Uncharacterized protein	7955	23
481	34.82	35	99	IPI00484266.2	hspe1 Uncharacterized protein	7955	33
482	34.8	35.1	74.9	IPI00774052.3	zgc:172295 Zgc:172295 protein	7955	28
483	34.73	36	80.1	IPI00505076.1	psma8 Proteasome subunit alpha type	7955	31
484	34.71	45.77	78.4	IPI00861182.2	aldh9a1b Aldehyde dehydrogenase family 9 member A1-B	7955	33
485	34.67	34.94	73.9	IPI00511236.2	ivd Isovaleryl Coenzyme A dehydrogenase	7955	43
486	34.66	35.6	99	IPI00489314.1	hmgb1 Uncharacterized protein	7955	24
487	34.48	34.79	77.3	IPI00490042.1	zgc:101129 Zgc:101129	7955	23
488	34.46	34.63	77.7	IPI00963365.2	LOC100334859 vinculin-like	7955	23
489	34.45	36.45	67.1	IPI00961937.2	LOC100332905 Uncharacterized protein	7955	23
490	34.36	34.5	76.8	IPI00500096.4	cryl1 Uncharacterized protein	7955	24
491	34.36	34.51	78.9	IPI00650582.5	zgc:114157 Catechol O-methyltransferase	7955	25
492	34.28	35.16	64.1	IPI00801264.1	ces3 carboxylesterase 3	7955	26
493	34.24	34.86	75.7	IPI00932106.1	nop56 Uncharacterized protein	7955	33
494	34.19	36.23	75.4	IPI00503058.4	pgrmc1 Uncharacterized protein	7955	25
495	34.18	47.9	89.1	IPI00502272.1	zgc:77517 Zgc:77517	7955	52
496	34.14	34.51	98.6	IPI00489287.1	rps19 Uncharacterized protein	7955	31
497	34.09	35.51	91.1	IPI00505466.1	atad3b ATPase family, AAA domain containing 3B	7955	28
498	34.05	34.31	76.6	IPI00495890.1	serpinb1 Uncharacterized protein	7955	34
499	34.04	34.69	84.1	IPI00865872.5	- Uncharacterized protein	7955	30
500	34.03	34.74	72.8	IPI01023874.1	cth Uncharacterized protein	7955	28
501	34.02	34.56	91.9	IPI00484580.2	rbp2a Uncharacterized protein	7955	32
502	33.96	34.09	99.5	IPI00610689.4	si:ch211-220f13.1 Brain acid soluble protein 1 homolog	7955	24
503	33.9	35.21	91.4	IPI00493658.2	rps2 Uncharacterized protein	7955	26
504	33.8	34.32	69.7	IPI00616233.5	aldh5a1 Uncharacterized protein	7955	22
505	33.71	33.73	68.1	IPI00934879.2	LOC100330353 plakophilin-3-like	7955	32
506	33.65	33.65	80.8	IPI00487987.1	rps14 Uncharacterized protein	7955	35
507	33.64	33.96	69	IPI00497557.3	atp6v1ba Uncharacterized protein	7955	21
508	33.59	35.01	91.2	IPI00508793.1	sdr16c5 Uncharacterized protein	7955	31
509	33.56	44.2	74.1	IPI00501165.2	hspa4b Uncharacterized protein	7955	34
510	33.48	33.85	86.8	IPI00481915.2	rpl6 Uncharacterized protein	7955	27
511	33.43	36.34	63.5	IPI00932332.2	prpf8 pre-mRNA processing factor 8	7955	45
512	33.41	35.42	79.8	IPI00859416.2	slc25a3 Solute carrier family 25 (Mitochondrial carrier	7955	35
513	33.39	33.79	79.3	IPI00809931.3	tmem214 transmembrane protein 214	7955	24
514	33.38	33.54	75.7	IPI00493405.2	zgc:101710 Zgc:101710 protein	7955	20
515	33.37	35.59	88	IPI00481307.1	rpl7a Uncharacterized protein	7955	34
516	33.37	34.09	75.5	IPI00488175.1	ola1 Obg-like ATPase 1	7955	21
517	33.36	33.57	63.7	IPI00613451.8	zgc:162816 Uncharacterized protein	7955	23
518	33.34	34.57	70.2	IPI00484571.3	ptgr1 Prostaglandin reductase 1	7955	28
519	33.32	33.92	64.1	IPI00961309.2	vps35 Uncharacterized protein	7955	28
520	33.27	33.57	72.9	IPI00496481.1	eif3s6ip Eukaryotic translation initiation factor 3 subunit L	7955	31
521	33.25	36.33	77.2	IPI00490411.1	tpt1 Translationally-controlled tumor protein homolog	7955	35
522	33.23	39.56	78.1	IPI00968824.1	ugt2a1 LOC791613 protein (Fragment)	7955	39
523	33.21	33.33	73.3	IPI00503659.3	ndufs3 NADH dehydrogenase (Ubiquinone) Fe-S protein 3	7955	22
524	33.21	33.25	45.4	IPI00882913.3	wu:fb17g07 hypothetical protein LOC797705	7955	32
525	33.2	34.24	65.4	IPI00500527.3	farsb Phenylalanine-tRNA synthetase-like	7955	24
526	33.2	33.25	71.5	IPI00508171.1	phyhd1 Phytanoyl-CoA dioxygenase domain-containing protein 1	7955	26
527	33.19	33.69	64.6	IPI00975369.3	ctsd Uncharacterized protein	7955	35
528	33.18	34.41	90.2	IPI00487430.1	rps9 ribosomal protein S9	7955	22
529	33.14	34.09	90.2	IPI00508226.4	ppia Peptidyl-prolyl cis-trans isomerase	7955	39
530	33.13	34.07	87.8	IPI00489672.1	zgc:92763 Zgc:92763	7955	34
531	33.11	33.8	62.4	IPI00489117.2	sf3b1 Uncharacterized protein	7955	25
532	33.09	33.62	72.6	IPI00919715.2	nars Uncharacterized protein	7955	28
533	33.05	33.58	87.6	IPI00490099.1	dnaja2 Uncharacterized protein	7955	24
534	33.05	35.32	61.2	IPI00933140.1	plxnb2a Plexin B2	7955	38
535	33.02	35.41	83.1	IPI00995420.1	LOC100536115 Uncharacterized protein	7955	28
536	32.9	33.04	73.2	IPI00494510.5	eif3c Eukaryotic translation initiation factor 3 subunit C	7955	33
537	32.88	33.9	82.9	IPI01006237.1	oat ornithine aminotransferase, mitochondrial-like isoform 1	7955	41
538	32.87	33.11	78.4	IPI00490531.2	zgc:112265 Zgc:112265	7955	31
539	32.87	33.95	67.1	IPI00770748.2	mars Uncharacterized protein	7955	28
540	32.83	33.01	66.8	IPI00508544.2	dlst Dihydrolipoamide S-succinyltransferase	7955	29
541	32.79	32.89	72	IPI00501910.3	ndufs2 NADH dehydrogenase (ubiquinone) Fe-S protein 2	7955	30
542	32.76	34.64	75	IPI00773460.2	kars Lysyl-tRNA synthetase	7955	32
543	32.75	32.99	76	IPI00487186.8	tars Uncharacterized protein	7955	27
544	32.65	34.68	59.1	IPI00491089.1	cdh1 E-cadherin	7955	28
545	32.59	48.69	95	IPI00570342.2	zgc:110380 Uncharacterized protein	7955	42
546	32.59	59.81	98.4	IPI00928998.1	tpm2 Uncharacterized protein	7955	44
547	32.58	34.1	77	IPI00496132.1	si:ch211-232m8.6;opa1 Dynamin-like 120 kDa protein, mitochondrial	7955	31
548	32.53	32.76	60.6	IPI00496539.4	apob Uncharacterized protein	7955	40
549	32.52	32.64	67.3	IPI00505472.3	supt16h Uncharacterized protein	7955	29
550	32.5	32.7	76.9	IPI00497887.1	zgc:85829 Zgc:85829	7955	42
551	32.48	58.84	88.9	IPI00495855.6	ldhba L-lactate dehydrogenase B-A chain	7955	51
552	32.46	35.29	98.3	IPI00498885.1	capza1b F-actin capping protein alpha-1 subunit	7955	29
553	32.44	94.89	86.7	IPI00920541.1	hbaa1 Novel alpha-globin	7955	266
554	32.39	32.6	56	IPI00499072.4	eftud2 Eftud2 protein	7955	26
555	32.37	33.34	84.7	IPI00618434.3	cyb5a Uncharacterized protein	7955	55
556	32.36	32.64	84.5	IPI00493786.3	nit2 Uncharacterized protein	7955	19
557	32.36	34.12	85.4	IPI00495178.1	sult1st3 Cytosolic sulfotransferase 3	7955	39
558	32.34	32.81	78.7	IPI00497357.2	dbt Dihydrolipoamide branched chain transacylase E2	7955	24
559	32.29	32.39	67.3	IPI00628995.2	LOC799904 III-FBPL	7955	47
560	32.19	34.62	84.1	IPI00997924.1	zgc:65987 Zgc:65987	7955	24
561	32.16	34.77	84.9	IPI00512373.2	atp5d Uncharacterized protein	7955	34
562	32.11	80.23	86.2	IPI00501009.2	got2b Aspartate aminotransferase	7955	80
563	32.08	32.44	62.7	IPI00931537.2	cad Carbamoyl-phosphate synthetase 2, aspartate transcarbamylase, and dihydroorotase	7955	26
564	32.05	32.13	77.1	IPI00516101.1	zgc:103559 Zgc:103559	7955	34
565	32.03	33.49	73.6	IPI00502027.1	eif5a2 Zgc:77429 protein	7955	30
566	31.95	32.14	74.2	IPI00489486.2	acy3.2 Aspartoacylase-2B	7955	24
567	31.93	34.71	90.6	IPI00487122.1	cct4 T-complex protein 1 subunit delta	7955	28
568	31.9	32.21	86	IPI00490401.4	atp5c1 ATP synthase gamma chain	7955	38
569	31.82	34.16	85	IPI00482097.1	psmc5 Uncharacterized protein	7955	28
570	31.81	34.12	70.2	IPI00502102.4	eif3ea Eukaryotic translation initiation factor 3 subunit E-A	7955	21
571	31.75	32.22	68	IPI00506794.2	arcn1l Uncharacterized protein	7955	22
572	31.69	32.59	79.6	IPI00613161.1	psmd11a proteasome 216S subunit, non-ATPase, 11a	7955	26
573	31.68	32.52	83.5	IPI01005348.1	LOC100537965 Uncharacterized protein	7955	27
574	31.59	33.32	68.2	IPI00481810.2	hnrnpu Uncharacterized protein	7955	22
575	31.58	32.01	81.9	IPI00501302.2	abcd3a ATP-binding cassette, sub-family D (ALD), member 3a	7955	24
576	31.58	32.8	73.9	IPI00510274.3	cyp3c1 Cytochrome P450 3C1	7955	33
577	31.55	31.82	80.9	IPI00800188.6	myo1c myosin-Ic	7955	25
578	31.52	32.98	79.5	IPI00510185.3	col6a1 collagen alpha-1(VI) chain	7955	26
579	31.49	32.16	82.3	IPI00512827.2	fbl Uncharacterized protein	7955	30
580	31.49	109.86	85	IPI01024028.1	acta2 Uncharacterized protein	7955	204
581	31.48	31.85	96.6	IPI00633389.1	rps16 Uncharacterized protein	7955	22
582	31.46	31.64	66.9	IPI01004942.2	LOC100150496 Uncharacterized protein	7955	31
583	31.42	33.68	67.6	IPI00501962.2	nqo1 NAD(P)H dehydrogenase [quinone] 1 isoform 2	7955	36
584	31.41	31.5	58.9	IPI00817540.2	zgc:152896 Uncharacterized protein	7955	38
585	31.4	31.57	79.5	IPI00496649.1	idh3a Uncharacterized protein	7955	18
586	31.36	32.53	98	IPI00997880.1	nme2b.2 Nucleoside diphosphate kinase	7955	41
587	31.31	31.99	97.6	IPI00489853.1	rps10 Uncharacterized protein	7955	26
588	31.31	33.88	87	IPI00494886.2	gbp1 Zgc:92185	7955	25
589	31.22	32.79	97.2	IPI00932994.1	ranbp1 Uncharacterized protein	7955	29
590	31.2	41.72	79.7	IPI00485502.4	cyp2j30 Uncharacterized protein	7955	30
591	31.18	31.75	64.1	IPI00490409.3	adh5 Uncharacterized protein	7955	28
592	31.12	31.27	94.7	IPI00488085.2	mylz2 Uncharacterized protein	7955	25
593	31.06	32.66	76.1	IPI00509630.3	psmc4 proteasome 26S subunit, ATPase, 4	7955	24
594	31.05	32.28	90.5	IPI00495615.1	zgc:92880 Zgc:92880	7955	42
595	30.94	31.18	69.2	IPI00492333.4	impdh1b Inosine-5'-monophosphate dehydrogenase	7955	22
596	30.89	31.71	94.7	IPI00801785.2	zgc:158409 nonhistone chromosomal protein HMG-14A-like	7955	28
597	30.85	31.18	70	IPI00491457.2	uqcrfs1;LOC100334857 Ubiquinol-cytochrome c reductase iron-sulfur subunit	7955	24
598	30.76	31.41	76.3	IPI00504292.2	nsfl1c;LOC100537232 Uncharacterized protein	7955	21
599	30.61	31.06	79.5	IPI00502158.4	si:dkey-11e23.4 acyl-coenzyme A thioesterase 2, mitochondrial	7955	29
600	30.56	31.9	74.7	IPI00900055.3	golgb1 Uncharacterized protein	7955	36
601	30.55	31.2	68	IPI00503522.4	pdcd6ip Uncharacterized protein	7955	28
602	30.32	31.5	91.2	IPI00492036.4	rps11 40S ribosomal protein s11	7955	26
603	30.17	34.37	87	IPI00489186.5	si:dkeyp-68f9.9 Uncharacterized protein	7955	29
604	30.1	30.27	76.9	IPI00502656.2	bckdha Uncharacterized protein	7955	27
605	30.08	30.16	96.8	IPI00786620.1	zgc:153978 Zgc:153978	7955	37
606	30.06	30.83	82.8	IPI01006392.1	wu:fb61a09 hypothetical protein LOC556125	7955	38
607	30.03	31.07	76.6	IPI00868462.1	zgc:171683 Zgc:171683 protein	7955	23
608	29.95	30.51	75.5	IPI00650155.2	rtn4a reticulon-4 isoform 4-l	7955	31
609	29.89	29.89	86.4	IPI00498467.2	msrb2 Methionine-R-sulfoxide reductase B2, mitochondrial	7955	20
610	29.62	29.82	81.9	IPI00491568.3	rpl23a Ribosomal protein L23a	7955	23
611	29.56	31.82	78.9	IPI00491304.4	cndp2 CNDP dipeptidase 2	7955	25
612	29.53	29.78	69.3	IPI00901276.3	LOC100148818 cytosolic phospholipase A2 gamma-like	7955	20
613	29.51	29.64	65.3	IPI00495935.2	ctsl1a Uncharacterized protein	7955	33
614	29.5	29.6	68.7	IPI00862410.4	nsfb N-ethylmaleimide-sensitive factor b	7955	17
615	29.48	29.67	88.4	IPI00505523.2	ak2 Adenylate kinase 2, mitochondrial	7955	31
616	29.46	29.58	77.9	IPI00481117.3	mtdha Uncharacterized protein	7955	19
617	29.44	29.56	71	IPI00855550.1	cars Uncharacterized protein	7955	20
618	29.42	29.7	74.8	IPI00801311.3	mov10b.1 Putative helicase mov-10-B.1	7955	24
619	29.4	44.38	88.1	IPI00495827.2	calrl2 Calreticulin, like 2	7955	36
620	29.36	30.21	71.1	IPI00496710.2	sb:cb252 Uncharacterized protein	7955	19
621	29.35	29.59	78.2	IPI00972685.1	zgc:153860 Uncharacterized protein	7955	24
622	29.31	29.62	68.6	IPI00962320.2	LOC100330576 beta,beta-carotene 9',10'-oxygenase	7955	26
623	29.28	29.49	86.9	IPI00499368.3	rtn3;LOC100538268 Uncharacterized protein	7955	30
624	29.26	29.75	75.6	IPI00500964.2	eif2s3 Eukaryotic translation initiation factor 2, subunit 3 gamma	7955	21
625	29.25	30.31	79.9	IPI00493439.2	elavl1 Uncharacterized protein	7955	28
626	29.22	39.88	76.6	IPI00484639.2	aldh1a2 Aldehyde dehydrogenase 1 family, member A2	7955	33
627	29.22	40.23	74.9	IPI00487445.1	ctnnb1 Catenin (Cadherin-associated protein), beta 1	7955	45
628	29.16	29.29	54.7	IPI00493247.4	hnrnpul1 Uncharacterized protein	7955	24
629	29.16	29.64	83.1	IPI00501402.3	atic Uncharacterized protein	7955	26
630	29.15	79.84	92.8	IPI00483215.2	eno1 Enolase	7955	80
631	29.14	29.26	80.3	IPI00994532.1	cast Uncharacterized protein	7955	24
632	29.12	29.66	63.9	IPI00505656.3	LOC799022 Beta-galactosidase	7955	23
633	29.01	29.34	85.3	IPI00513090.2	atp1b1a ATPase, Na+/K+ transporting, beta 1a polypeptide	7955	25
634	28.97	30.3	81.8	IPI00513222.3	phyh Uncharacterized protein	7955	25
635	28.88	38.7	80.5	IPI00508395.1	ckmb Ckmb protein	7955	37
636	28.88	28.91	68.2	IPI00650410.1	scrib Protein scribble homolog	7955	25
637	28.86	29.23	72.6	IPI00492140.2	dlat Uncharacterized protein	7955	23
638	28.8	28.93	88.4	IPI00503255.3	mlec Malectin	7955	19
639	28.78	28.82	67.9	IPI00512078.6	hnrnpm heterogeneous nuclear ribonucleoprotein M	7955	21
640	28.78	32.59	87.8	IPI00864532.4	wu:fd55e03 retinol dehydrogenase-like	7955	28
641	28.76	29.84	78.3	IPI00502441.3	zgc:112407 Tetratricopeptide repeat protein 38	7955	23
642	28.71	29.36	56.4	IPI00493628.5	cfb Cfb protein	7955	21
643	28.68	30.29	75.4	IPI00502251.5	ftr82 Si:dkey-252h13.6	7955	25
644	28.67	28.71	54.8	IPI00902171.2	si:dkey-206f21.2 Uncharacterized protein	7955	23
645	28.64	31.38	84.3	IPI00501609.2	gstt1b Glutathione S-transferase theta 1b	7955	36
646	28.63	29.52	70.7	IPI00496784.2	txndc5 Uncharacterized protein	7955	21
647	28.6	29.06	74	IPI00487743.2	hao2 Hydroxyacid oxidase 2	7955	19
648	28.58	28.91	66.8	IPI00493991.10	zgc:101723 Trans-1,2-dihydrobenzene-1,2-diol dehydrogenase	7955	21
649	28.56	28.72	68.1	IPI00960790.2	cfi complement factor I	7955	23
650	28.54	28.72	67.6	IPI00493829.1	zgc:64119 Zgc:64119	7955	31
651	28.51	30.99	90.7	IPI00495027.1	zgc:92903 Thioredoxin	7955	29
652	28.49	28.64	75.6	IPI00484756.1	zgc:100918 Zgc:100918	7955	21
653	28.49	29.45	71.4	IPI00861378.4	LOC100330415 6-phosphofructo-2-kinase/fructose-2,6-biphosphatase-like	7955	20
654	28.4	28.83	83.4	IPI00997500.1	nme4 Nucleoside diphosphate kinase	7955	27
655	28.37	28.7	82.9	IPI00489051.1	sfxn1 Sideroflexin 1	7955	26
656	28.37	28.82	55.6	IPI00506027.6	gyg1 Uncharacterized protein	7955	22
657	28.35	30.58	71.6	IPI00492519.2	calua Calumenin-A	7955	22
658	28.35	32.06	93.1	IPI00508331.2	rps15a Uncharacterized protein	7955	24
659	28.33	32.26	84.7	IPI00817332.5	ddx5 Uncharacterized protein	7955	27
660	28.29	29.99	58.4	IPI00996107.1	slco1d1 74 kDa protein	7955	27
661	28.2	32.53	86.4	IPI01027899.1	zgc:66382 Uncharacterized protein	7955	32
662	28.15	28.2	78.2	IPI00481355.1	lasp1 Uncharacterized protein	7955	21
663	28.13	28.58	71.6	IPI00491921.2	ppm1aa Uncharacterized protein	7955	20
664	28.11	30.3	72.3	IPI00484788.2	pdha1a Uncharacterized protein	7955	33
665	28.09	28.37	82.6	IPI00492771.4	ndufa9 Ndufa9 protein	7955	27
666	28.04	29.5	59	IPI00933997.3	LOC100001302 Uncharacterized protein	7955	27
667	28.01	28.63	75.4	IPI00614907.2	prdx3 Uncharacterized protein	7955	26
668	28	28.21	94.8	IPI00810517.2	prhoxnb 2-oxo-4-hydroxy-4-carboxy-5-ureidoimidazoline decarboxylase	7955	32
669	28	68.32	78.3	IPI00832179.3	actn1 Uncharacterized protein	7955	65
670	27.9	28.48	79.6	IPI00484185.2	dnajc3 Uncharacterized protein	7955	26
671	27.9	28.38	81.6	IPI00511706.5	LOC100334830 kynureninase-like	7955	23
672	27.87	29.96	79.4	IPI00503254.2	bcap31 B-cell receptor-associated protein 31	7955	29
673	27.85	31.81	89.8	IPI00513610.2	sult3st1 Uncharacterized protein	7955	34
674	27.85	30.14	74.7	IPI00614982.2	zgc:174637 Uncharacterized protein	7955	18
675	27.78	27.88	80.9	IPI00509886.4	psma6a Proteasome subunit alpha type	7955	20
676	27.76	29.3	87.5	IPI00490073.1	rps18 40S ribosomal protein S18	7955	23
677	27.71	33.89	71.9	IPI00495689.4	rbp2b Uncharacterized protein	7955	31
678	27.7	31.07	74.4	IPI00511065.2	anxa13 Annexin A13	7955	17
679	27.69	38.96	62.1	IPI00500189.1	hnrnpa1 Heterogeneous nuclear ribonucleoprotein A1	7955	37
680	27.62	28.25	67.5	IPI00498960.3	dci Uncharacterized protein	7955	29
681	27.6	28.21	73	IPI00770438.3	zgc:162977 Zgc:162977 protein	7955	20
682	27.56	30.23	98.2	IPI00483594.4	cmpk UMP-CMP kinase	7955	24
683	27.46	28.01	66	IPI00498165.1	cs Citrate synthase, mitochondrial	7955	23
684	27.46	27.61	80.6	IPI00508873.1	capzb Uncharacterized protein	7955	32
685	27.45	30.66	73.3	IPI00480956.1	glrx3 Glutaredoxin 3	7955	20
686	27.45	28.59	89.7	IPI00492185.1	rpl26 Uncharacterized protein	7955	21
687	27.42	27.87	84.4	IPI00506324.3	letm1 LETM1 and EF-hand domain-containing protein 1, mitochondrial	7955	18
688	27.29	27.46	57	IPI00506418.3	llgl2 Lethal(2) giant larvae protein homolog 2	7955	22
689	27.27	27.39	95.5	IPI00484752.2	uqcrb Uncharacterized protein	7955	22
690	27.22	27.38	86.7	IPI00481227.1	pacsin3 Zgc:56324	7955	22
691	27.1	27.43	67.8	IPI00619557.5	ido1 Putative indoleamine 2,3-dioxygenase	7955	25
692	27.07	27.18	73.9	IPI00481361.3	cyc1 Uncharacterized protein	7955	39
693	27.06	27.68	84.7	IPI00508542.1	zgc:86898 Zgc:86898	7955	24
694	27.06	28.47	84.9	IPI00836885.1	hmox1 Uncharacterized protein	7955	26
695	27.04	27.51	72.6	IPI00494904.4	acads Uncharacterized protein	7955	25
696	27.02	27.19	69.8	IPI00483521.5	gspt1l Uncharacterized protein	7955	19
697	27.02	28.51	79.7	IPI00498688.1	apoeb Apolipoprotein Eb	7955	21
698	26.98	27.11	90.1	IPI00494738.1	rps13 Uncharacterized protein	7955	19
699	26.96	27.49	67.7	IPI00972626.1	ktn1 Uncharacterized protein	7955	21
700	26.94	28.9	64.5	IPI00483346.2	nucb2a Nucleobindin 2a	7955	21
701	26.88	26.96	50.9	IPI00902390.1	nomo nodal modulator 1	7955	19
702	26.87	27.15	70	IPI00612598.3	rdh1 Retinol dehydrogenase 1	7955	18
703	26.85	27.49	82.5	IPI00509532.2	gstal Glutathione S-transferase	7955	23
704	26.84	26.94	81.2	IPI00509551.3	calm2b;calm2a;calm3b;calm1a;calm1b;calm3a Calmodulin	7955	28
705	26.82	27.2	87.9	IPI00497768.2	akr1b1 Uncharacterized protein	7955	28
706	26.79	27.41	81.6	IPI00488653.2	slc27a2 Solute carrier family 27 (Fatty acid transporter), member 2	7955	20
707	26.79	28.51	54.6	IPI00507382.1	zgc:92481 Zgc:92481	7955	29
708	26.74	27.46	73.9	IPI00868415.1	zgc:171674 Zgc:171674 protein	7955	21
709	26.72	72.26	98	IPI00866585.2	tpm3 Uncharacterized protein	7955	54
710	26.71	27.52	69.7	IPI00495644.3	prkar1aa protein kinase, cAMP-dependent, regulatory, type I, alpha (tissue specific extinguisher 1) a	7955	16
711	26.66	27.26	83.4	IPI00493444.1	rbm4.2 Rbm4.2 protein	7955	16
712	26.65	35.04	92	IPI00487482.1	zgc:65861 Zgc:65861	7955	31
713	26.58	27.18	95.8	IPI00504978.1	park7 Protein DJ-1	7955	24
714	26.51	27.86	93.5	IPI00500253.1	rpl10a 60S ribosomal protein L10a	7955	26
715	26.5	28.31	87.5	IPI00502356.1	zgc:65996 Zgc:65996	7955	23
716	26.49	27.66	83.2	IPI00786645.2	cyb5r2 NADH-cytochrome b5 reductase 2	7955	22
717	26.46	28.36	62.2	IPI00498958.3	stat5.1 Stat5 protein	7955	27
718	26.44	26.6	69.4	IPI00851566.2	zgc:110010 Uncharacterized protein	7955	15
719	26.4	26.61	71.1	IPI00770937.3	zgc:76871 tRNA-splicing ligase RtcB homolog	7955	19
720	26.37	26.69	96.5	IPI00487017.3	srsf1a Serine/arginine-rich splicing factor 1A	7955	23
721	26.37	30.82	66.3	IPI00866157.2	tdo2a Tryptophan 2,3-dioxygenase A	7955	23
722	26.36	26.83	72.1	IPI00481232.2	cyp1a Cytochrome P450, family 1, subfamily A, polypeptide 1	7955	26
723	26.35	26.44	62.3	IPI00972706.1	vasp Uncharacterized protein	7955	18
724	26.34	26.75	70	IPI00996807.1	LOC100334797 Uncharacterized protein	7955	20
725	26.33	26.4	99.1	IPI00500941.4	si:ch211-15d5.5 Si:ch211-15d5.5	7955	18
726	26.26	26.63	80	IPI00490421.6	LOC559236 aspartyl/asparaginyl beta-hydroxylase	7955	28
727	26.24	26.46	73.3	IPI00484111.3	zgc:92726 Proteasome subunit alpha type	7955	28
728	26.23	26.61	81.1	IPI00511230.2	psmd12 Proteasome (Prosome, macropain) 26S subunit, non-ATPase, 12	7955	16
729	26.23	26.23	73.4	IPI00932138.2	esd Uncharacterized protein	7955	23
730	26.21	26.51	88.8	IPI00963069.2	LOC100331639 Uncharacterized protein	7955	25
731	26.19	26.47	92.4	IPI00855614.1	qdpra Uncharacterized protein	7955	21
732	26.15	26.18	90.9	IPI00650873.2	zgc:195154 Thymosin beta-11	7955	24
733	26.12	26.45	80	IPI00511834.2	uchl3 Uncharacterized protein	7955	19
734	26.12	28.58	88.4	IPI00855302.1	cbr1 Uncharacterized protein	7955	21
735	26.11	26.19	93.2	IPI00480940.2	ddt D-dopachrome tautomerase	7955	30
736	26.08	31.95	73.1	IPI00612382.1	zgc:136871 S-adenosylmethionine synthase	7955	30
737	26.04	26.44	93	IPI00505170.3	rpl8 60S ribosomal protein L8	7955	27
738	25.99	26.71	74.7	IPI00495439.2	hacl1 2-hydroxyacyl-CoA lyase 1	7955	24
739	25.97	26.88	69.4	IPI00855361.1	zgc:85777 Zgc:85777	7955	32
740	25.95	26.21	64	IPI00481686.3	dhx15 Uncharacterized protein	7955	19
741	25.91	27.6	61.6	IPI00490510.7	lars Uncharacterized protein (Fragment)	7955	20
742	25.83	25.93	51.4	IPI00962432.2	im:7141335 nuclear pore membrane glycoprotein 210	7955	29
743	25.83	26.1	65.5	IPI00995394.1	ahsg Fetuin-A	7955	17
744	25.82	28.08	59.2	IPI00993764.1	LOC794635 Uncharacterized protein	7955	30
745	25.81	26.17	88.6	IPI00481155.2	rpl23 60S ribosomal protein L23	7955	22
746	25.75	26.19	67.5	IPI00860709.1	add1 Uncharacterized protein	7955	20
747	25.69	26.25	89.9	IPI00505672.3	rps8 40S ribosomal protein S8	7955	29
748	25.67	26.48	64.8	IPI00484770.1	psmb2 Proteasome subunit beta type	7955	19
749	25.66	25.7	74.5	IPI00506475.1	zgc:55605 Zgc:55605 protein	7955	16
750	25.63	26.2	82.6	IPI00507022.2	hprt1 Uncharacterized protein	7955	20
751	25.59	26.08	61.2	IPI00511622.2	ppp6r2 Uncharacterized protein	7955	18
752	25.59	25.88	92.6	IPI00971810.1	zgc:101030 Uncharacterized protein	7955	23
753	25.56	28.66	70	IPI00482681.5	zgc:163038 MGC163038 protein	7955	26
754	25.56	25.65	65.9	IPI00758634.2	zgc:136858 Zgc:136858	7955	21
755	25.55	28.53	90.2	IPI00489232.2	psme2 Uncharacterized protein	7955	19
756	25.52	27.48	74	IPI00481317.1	psmd7 Proteasome (Prosome, macropain) 26S subunit, non-ATPase, 7	7955	16
757	25.5	30.41	74	IPI00802893.5	wu:fi04e12 Uncharacterized protein (Fragment)	7955	33
758	25.48	27.46	80.7	IPI00503150.4	erlin1 Erlin-1	7955	16
759	25.43	27.95	83.1	IPI00486983.1	myl12.1 Uncharacterized protein	7955	33
760	25.42	25.8	77.7	IPI00508674.1	dhrs1 Uncharacterized protein	7955	25
761	25.42	26.41	83.9	IPI00632292.1	rpl13a Uncharacterized protein	7955	16
762	25.4	25.47	53.9	IPI00487053.1	itm1 Integral membrane protein 1	7955	27
763	25.39	25.59	81.4	IPI00482135.3	sqrdl Uncharacterized protein	7955	17
764	25.39	25.76	83.9	IPI00493342.2	hibadhb 3-hydroxyisobutyrate dehydrogenase b	7955	17
765	25.37	26.59	78.9	IPI00919450.2	sept2 Uncharacterized protein (Fragment)	7955	15
766	25.35	25.44	66.9	IPI00772618.4	si:ch211-254d18.3 Uncharacterized protein	7955	18
767	25.32	25.47	66.5	IPI00494927.3	npepl1 Aminopeptidase-like 1	7955	21
768	25.3	25.89	71.5	IPI00497153.3	sucla2 Uncharacterized protein	7955	20
769	25.28	27.98	79.5	IPI00501573.2	psmd6 Proteasome (Prosome, macropain) 26S subunit, non-ATPase, 6	7955	21
770	25.28	25.34	45.1	IPI00889358.4	hspg2 Uncharacterized protein	7955	26
771	25.21	26.03	86.1	IPI00963328.1	manf Zgc:153327	7955	20
772	25.21	25.6	62.2	IPI01016907.1	fads2 Uncharacterized protein	7955	15
773	25.2	25.73	74.5	IPI00742485.2	zgc:136866 Uncharacterized protein	7955	18
774	25.18	25.23	76.6	IPI00491593.1	eif3d Eukaryotic translation initiation factor 3 subunit D	7955	18
775	25.17	25.33	69.9	IPI00996835.1	LOC100329326 Microtubule-associated protein	7955	24
776	25.16	39.86	79.9	IPI00489868.3	pa2g4a Uncharacterized protein	7955	30
777	25.14	25.43	66.2	IPI00510190.1	sec63 SEC63-like	7955	24
778	25.11	25.18	69.7	IPI00639643.3	si:ch211-270n8.1 Uncharacterized protein	7955	25
779	25.1	25.45	51.7	IPI01023575.1	kpnb1 importin subunit beta-1	7955	29
780	25.08	25.16	64.8	IPI00499115.2	zgc:55652 Uncharacterized protein	7955	21
781	25.06	25.77	75.3	IPI00617546.1	psma3 Proteasome subunit alpha type	7955	22
782	25.05	25.36	83.8	IPI00498624.2	zgc:103654 Zgc:103654	7955	19
783	25.05	33.34	81.1	IPI00504812.3	gpd1 Uncharacterized protein	7955	31
784	24.98	25.08	60.9	IPI01023898.1	LOC100330772 Uncharacterized protein	7955	19
785	24.96	25.84	65.8	IPI00510272.1	serpinc1 Uncharacterized protein	7955	21
786	24.94	25.72	65.4	IPI00613140.4	si:ch211-288g17.4 Uncharacterized protein	7955	18
787	24.92	27.43	60.4	IPI00506555.2	amy2a Uncharacterized protein	7955	22
788	24.82	25	65	IPI00504070.1	zgc:92041 Zgc:92041	7955	26
789	24.8	29.27	67.1	IPI00859430.2	wu:fc21h01 cytochrome P450-like	7955	18
790	24.76	24.97	68.8	IPI00972488.2	stat3 Uncharacterized protein	7955	16
791	24.75	25.51	65.2	IPI00510677.1	usp14 Ubiquitin carboxyl-terminal hydrolase	7955	22
792	24.73	27.74	76.8	IPI00504913.2	pdia2 Uncharacterized protein	7955	20
793	24.71	26.99	65.8	IPI00960424.1	LOC100333043 Uncharacterized protein	7955	20
794	24.69	25.03	64.8	IPI00851385.3	ide Insulin-degrading enzyme	7955	25
795	24.68	24.85	63	IPI00617335.2	hnrnpl2 Uncharacterized protein	7955	26
796	24.67	26.2	64.4	IPI00491050.1	hnrnpab heterogeneous nuclear ribonucleoprotein A/B	7955	29
797	24.65	24.83	68.8	IPI00502009.2	txnrd1 thioredoxin reductase 3	7955	25
798	24.65	25.21	79.1	IPI00502075.2	tmod2 Tropomodulin 2	7955	19
799	24.63	25.32	66.1	IPI00486046.3	pgm3 Phosphoglucomutase 3	7955	22
800	24.62	25.01	59.5	IPI00490214.8	LOC558088 Uncharacterized protein	7955	22
801	24.58	25.04	81.2	IPI00498278.2	nono Uncharacterized protein	7955	13
802	24.58	24.98	42.7	IPI00963471.1	LOC100332784 Uncharacterized protein	7955	25
803	24.56	24.76	70.3	IPI00490517.1	arpc1a Uncharacterized protein	7955	14
804	24.55	24.75	73.4	IPI00512038.1	ilf2 Interleukin enhancer-binding factor 2 homolog	7955	18
805	24.55	24.8	57.5	IPI00835459.3	postn Uncharacterized protein	7955	21
806	24.49	24.99	59.7	IPI00483678.6	itga1 integrin alpha-1-like	7955	16
807	24.45	24.66	82.6	IPI00486525.5	sod2 Superoxide dismutase	7955	33
808	24.43	25.57	96.5	IPI00506488.1	rplp2 Uncharacterized protein	7955	30
809	24.4	30.1	81.6	IPI00503173.3	ephx1l epoxide hydrolase 1	7955	22
810	24.4	24.48	74.2	IPI00963173.1	LOC100007703;zgc:153921 LOC100007703 protein	7955	17
811	24.39	39.86	91.4	IPI00511497.2	ywhai Ywhai protein	7955	36
812	24.37	24.71	60.4	IPI00608899.2	dsc2l Uncharacterized protein	7955	19
813	24.36	28.01	64.7	IPI00487375.1	clic5 Chloride intracellular channel 5	7955	23
814	24.35	24.87	74.1	IPI00611707.8	gusb beta-glucuronidase	7955	23
815	24.33	24.4	60.8	IPI00835014.2	xrn2 5'-3' exoribonuclease 2	7955	17
816	24.29	26.53	57.6	IPI00488205.1	dnpep Zgc:55944	7955	26
817	24.29	24.6	78.2	IPI00504541.1	gatm Glycine amidinotransferase, mitochondrial	7955	18
818	24.27	26.29	78.2	IPI00993228.1	pkm2a Pyruvate kinase	7955	20
819	24.26	25.2	94.3	IPI00499105.2	rpl24 60S ribosomal protein L24	7955	17
820	24.2	24.71	70.6	IPI00934716.1	zgc:55262 Uncharacterized protein	7955	23
821	24.13	24.97	88.6	IPI00509360.2	rps12 40S ribosomal protein S12	7955	30
822	24.1	26.33	76.4	IPI00774214.2	akr1a1b Uncharacterized protein	7955	20
823	24.09	24.3	69.3	IPI00995870.1	dbnl Uncharacterized protein	7955	17
824	24.08	24.19	67.6	IPI00500139.1	ilvbl Acetolactate synthase-like protein	7955	22
825	24.07	24.44	93.2	IPI00492852.1	rpl30 Uncharacterized protein	7955	18
826	24.01	24.82	51.1	IPI00860139.2	coro1ca Coronin, actin binding protein, 1C	7955	18
827	24.01	24.27	57	IPI00997315.1	osbpl2 Oxysterol-binding protein	7955	15
828	24	24.13	59.8	IPI00944344.2	polr2b DNA-directed RNA polymerase II subunit RPB2	7955	20
829	23.99	26.76	85.1	IPI00485290.6	apoa4 Apolipoprotein A-IV	7955	14
830	23.98	71.65	81.1	IPI00482496.2	tuba8l2 Tubulin, alpha 8 like 2	7955	93
831	23.98	36.1	90	IPI00920198.1	gstm3 Uncharacterized protein	7955	35
832	23.96	32.99	97	IPI00497774.1	ppial Peptidyl-prolyl cis-trans isomerase	7955	37
833	23.95	24.18	90.9	IPI00512881.2	napa Uncharacterized protein	7955	18
834	23.94	30.72	76.3	IPI00484709.1	fubp1 Uncharacterized protein	7955	29
835	23.91	25.51	67.8	IPI00484018.4	cyp4v2 Uncharacterized protein	7955	19
836	23.91	24.08	66.9	IPI00491051.6	- Uncharacterized protein	7955	19
837	23.86	27.23	66.4	IPI00836713.1	zgc:77086 Zgc:77086	7955	19
838	23.85	24.91	75.9	IPI00483517.1	arpc2 Uncharacterized protein	7955	22
839	23.84	24.35	68.2	IPI00920104.1	ctsba Uncharacterized protein	7955	34
840	23.81	23.85	90.4	IPI00484901.2	acad8 Uncharacterized protein	7955	15
841	23.79	24.26	73.5	IPI00499213.1	ndufa10 NADH dehydrogenase (Ubiquinone) 1 alpha subcomplex, 10	7955	26
842	23.79	24.27	69.8	IPI00962449.2	wu:fi37e09 hypothetical protein LOC334247	7955	17
843	23.78	23.95	62.1	IPI00931839.2	LOC571042 Uncharacterized protein	7955	18
844	23.72	23.97	81.7	IPI00509689.2	rab11b Uncharacterized protein	7955	17
845	23.7	23.85	67.5	IPI00804529.2	itln1 Uncharacterized protein	7955	18
846	23.68	24.24	68.3	IPI00772257.2	khdrbs1a Uncharacterized protein	7955	26
847	23.66	24.12	95.3	IPI00506330.4	rab2a Uncharacterized protein	7955	22
848	23.64	23.85	69.2	IPI00636499.1	LOC572976;sfxn2 Sideroflexin 2	7955	15
849	23.59	23.79	74.6	IPI00491036.1	ppt1 Palmitoyl-protein thioesterase 1	7955	15
850	23.56	23.69	83.9	IPI00486329.1	rhoaa Uncharacterized protein	7955	18
851	23.55	23.71	75.9	IPI00483561.2	hagh Isoform 1 of Hydroxyacylglutathione hydrolase, mitochondrial	7955	21
852	23.53	25.24	82.3	IPI00507865.2	psmc6 Uncharacterized protein	7955	21
853	23.51	24.78	91.6	IPI00505662.2	lrpap1 Uncharacterized protein	7955	12
854	23.49	23.6	69.5	IPI00493420.3	LOC570630 Uncharacterized protein	7955	15
855	23.49	24.82	85.4	IPI00493887.3	hnrpkl Uncharacterized protein	7955	20
856	23.46	25.13	86.5	IPI00508844.1	rpl9 Uncharacterized protein	7955	20
857	23.45	23.58	66.7	IPI00490053.1	zgc:103764 histidine triad nucleotide-binding protein 1	7955	22
858	23.45	23.64	79.7	IPI00859129.4	dnm2 Uncharacterized protein	7955	18
859	23.39	25.35	83.4	IPI00496365.2	grpel1 GrpE protein homolog	7955	13
860	23.36	24.15	77	IPI00490580.4	alad Delta-aminolevulinic acid dehydratase	7955	18
861	23.35	23.68	67.7	IPI00495081.4	pipox peroxisomal sarcosine oxidase	7955	23
862	23.24	24.63	55.3	IPI01006766.1	sf3b3 splicing factor 3B subunit 3	7955	19
863	23.22	23.66	77	IPI00508758.2	rps5 Uncharacterized protein	7955	25
864	23.2	25.5	79.3	IPI00490313.2	psma5 Proteasome subunit alpha type	7955	30
865	23.1	23.26	83.7	IPI00510559.3	rpl10 Uncharacterized protein	7955	16
866	23.06	23.35	61.3	IPI00484463.2	gclc Uncharacterized protein	7955	19
867	23.06	23.26	65.4	IPI00491067.3	hexa Zgc:112084 protein	7955	15
868	23.06	23.64	57.3	IPI00499779.1	zgc:103594 Cytochrome c oxidase subunit 6A, mitochondrial	7955	31
869	23.06	23.57	72.1	IPI00920207.1	gmps Uncharacterized protein	7955	18
870	23.05	39.83	71.6	IPI00487455.3	gapdhs Glyceraldehyde 3-phosphate dehydrogenase, testis-specific	7955	38
871	23.01	23.94	76.9	IPI00482767.5	si:dkey-147f23.1 Uncharacterized protein	7955	19
872	22.95	25.21	46	IPI00484227.4	rbb4l Retinoblastoma binding protein 4, like	7955	16
873	22.95	23.79	78.6	IPI01023519.1	- Uncharacterized protein	7955	33
874	22.94	28.38	79.5	IPI00499593.4	zgc:162944 Zgc:162944 protein	7955	37
875	22.92	23.69	78.8	IPI00513225.4	si:ch211-12e1.4 Uncharacterized protein	7955	21
876	22.89	24.72	62.1	IPI01005507.1	xrcc6 Xrcc6 protein	7955	19
877	22.88	41.2	98.5	IPI00851936.2	LOC569982 histone H1-like	7955	37
878	22.88	27.65	78.8	IPI00860984.2	zgc:136371 Uncharacterized protein	7955	22
879	22.86	23.66	82.2	IPI00961262.2	LOC562943 Uncharacterized protein	7955	24
880	22.85	28.8	80.2	IPI00499584.3	zgc:112056 Uncharacterized protein	7955	30
881	22.81	23.25	76.9	IPI00500865.4	capns1a calpain, small subunit 1 a	7955	17
882	22.81	23.03	86.7	IPI00834927.1	zgc:56585 Zgc:56585 protein	7955	17
883	22.77	22.85	81	IPI00481690.3	prmt1 Uncharacterized protein	7955	16
884	22.77	22.89	68.3	IPI00773000.5	fetub Uncharacterized protein	7955	23
885	22.76	23.28	75.5	IPI01023985.2	LOC100000597 septin-7	7955	19
886	22.74	23.42	91.4	IPI00511453.4	zgc:92066 Ferritin	7955	14
887	22.69	22.78	45	IPI00773172.3	slc2a2 Uncharacterized protein	7955	19
888	22.68	22.77	84.2	IPI00503919.6	si:rp71-45k5.4 Proteasome subunit alpha type	7955	16
889	22.65	22.74	83	IPI00498849.1	decr2 Peroxisomal 2,4-dienoyl-CoA reductase	7955	17
890	22.65	23.13	66.8	IPI00511724.1	zgc:92139 Zgc:92139	7955	14
891	22.63	22.78	73.9	IPI00758642.4	cpox Coproporphyrinogen oxidase	7955	14
892	22.62	23.58	68.3	IPI00735002.2	fdps Farnesyl diphosphate synthase	7955	17
893	22.59	24.93	55.4	IPI00501062.1	ipo7 Uncharacterized protein	7955	18
894	22.59	22.76	75	IPI00510927.2	zgc:101897 Zgc:101897	7955	16
895	22.58	23.23	85	IPI00500367.4	snx5 Sorting nexin 5	7955	18
896	22.55	23.7	80.5	IPI00486502.4	LOC561103 interferon-induced protein 44-like	7955	22
897	22.53	22.77	68.9	IPI00491296.1	anp32a Acidic leucine-rich nuclear phosphoprotein 32 family member A	7955	15
898	22.48	22.97	80.1	IPI01024489.1	s100u S100u protein (Fragment)	7955	14
899	22.38	22.88	68.6	IPI00503292.2	abce1 ATP-binding cassette, sub-family E (OABP), member 1	7955	18
900	22.36	22.53	86.1	IPI00491824.1	zgc:56049 Zgc:56049	7955	25
901	22.36	22.6	68.5	IPI00501258.2	zgc:77126 Zgc:77126	7955	15
902	22.35	25.74	77.4	IPI00834772.2	dhrs13 Zgc:101719	7955	23
903	22.34	23.36	68.9	IPI00614996.4	LOC100332705;aldh18a1 aldehyde dehydrogenase 18A1	7955	21
904	22.33	24.84	99.1	IPI00486605.3	pvalb2 Parvalbumin-2	7955	15
905	22.32	24.1	67.3	IPI01024627.1	emilin1b Uncharacterized protein	7955	20
906	22.19	22.48	59.7	IPI00508715.2	atl3 Atlastin 3	7955	16
907	22.16	22.66	71.3	IPI00639216.2	nt5c2a Uncharacterized protein	7955	26
908	22.15	22.41	78	IPI00630204.2	ptgesl Uncharacterized protein	7955	14
909	22.13	22.36	75.3	IPI00500216.4	hnrpdl Uncharacterized protein	7955	14
910	22.1	22.4	73.5	IPI00502611.4	zgc:92578 chaperone activity of bc1 complex-like, mitochondrial	7955	19
911	22.1	22.15	60.3	IPI00510117.7	atp2b4 Plasma membrane calcium ATPase 4	7955	14
912	22.05	25.07	66.5	IPI00650880.2	ugt5c2 Zgc:153270	7955	20
913	22.01	22.44	64.1	IPI00492962.3	glod4 Uncharacterized protein	7955	14
914	21.97	22.97	87.9	IPI00786522.2	aimp1 Uncharacterized protein	7955	15
915	21.97	22.08	60.1	IPI00915651.1	gsna Uncharacterized protein	7955	37
916	21.94	22.25	82.6	IPI00512704.1	ndufa8 Uncharacterized protein	7955	18
917	21.94	22.55	53.5	IPI00961414.1	uo:ion005 ependymin isoform 1	7955	21
918	21.93	21.99	52.4	IPI00504345.5	wu:fk24c07 Uncharacterized protein	7955	15
919	21.93	22.4	68.6	IPI00998007.1	xrcc5 Uncharacterized protein	7955	15
920	21.92	22.04	54.4	IPI00491169.6	LOC100537604 Uncharacterized protein	7955	21
921	21.91	21.93	85.7	IPI00510592.2	ndufb9 Ndufb9 protein	7955	15
922	21.88	22.83	79.7	IPI00491794.1	slc25a20 Uncharacterized protein	7955	17
923	21.88	21.97	95.1	IPI00497651.2	uqcrq cytochrome b-c1 complex subunit 8	7955	18
924	21.8	22.3	81.6	IPI00485654.4	si:dkey-72l14.9 Uncharacterized protein	7955	19
925	21.77	24.94	84.9	IPI00481541.1	cyb5r3 Novel protein similar to diaphorase	7955	18
926	21.76	40.96	73.2	IPI00499018.4	LOC558552 Uncharacterized protein	7955	55
927	21.75	21.89	73.7	IPI00481107.2	ddx19 DEAD/H (Asp-Glu-Ala-Asp/His) box polypeptide 19	7955	20
928	21.75	22.1	82.6	IPI00495829.5	rap1b Ras-related protein Rap-1b	7955	18
929	21.63	21.71	62.9	IPI01004752.1	LOC100537823 microfibril-associated glycoprotein 4-like	7955	20
930	21.62	21.64	58.3	IPI00485918.2	ssr4 Signal sequence receptor, delta	7955	30
931	21.61	22.29	64.3	IPI00507767.4	seta Uncharacterized protein	7955	14
932	21.59	21.69	73.9	IPI00570211.4	nsdhl NAD(P) dependent steroid dehydrogenase-like	7955	15
933	21.58	21.84	85.2	IPI00482732.1	arhgdia Uncharacterized protein	7955	13
934	21.58	21.91	56.6	IPI00510940.1	faah2a Fatty-acid amide hydrolase 2-A	7955	19
935	21.56	21.57	91	IPI00494833.1	zgc:73107 Zgc:73107	7955	20
936	21.55	21.71	87.8	IPI00503909.4	rpl14 Uncharacterized protein	7955	16
937	21.54	21.83	53.1	IPI00504588.4	zgc:110251 Zgc:110251	7955	15
938	21.5	24.78	66.7	IPI00485245.3	zgc:110339 Zgc:110339	7955	22
939	21.47	22.86	78.4	IPI00494565.8	LOC795887 interferon-induced protein 44	7955	21
940	21.45	23.79	61.3	IPI00507094.2	ehd2 Uncharacterized protein	7955	17
941	21.38	21.56	76.2	IPI00493782.1	ppp1cab protein phosphatase 1, catalytic subunit, alpha-like	7955	15
942	21.37	21.56	83.1	IPI00483526.2	psmb1 Proteasome subunit beta type	7955	20
943	21.37	22.58	88.2	IPI00615495.2	zgc:123210 Zgc:123210 protein	7955	15
944	21.32	23.54	66.1	IPI00998537.2	LOC100536003 Uncharacterized protein	7955	22
945	21.29	31.63	67.8	IPI00512158.4	sptb Spectrin, beta, erythrocytic	7955	38
946	21.21	21.25	72.3	IPI00495552.1	pitrm1 Presequence protease, mitochondrial	7955	23
947	21.21	23.91	67.4	IPI00505893.3	zgc:101540 Uncharacterized protein	7955	20
948	21.16	25.79	98.5	IPI00504420.1	fabp7a Uncharacterized protein	7955	29
949	21.16	23.2	83.9	IPI00817211.1	dcxr Uncharacterized protein	7955	28
950	21.15	23.46	76	IPI00507036.2	sfpq Uncharacterized protein	7955	18
951	21.15	23.44	88.8	IPI00555420.1	zgc:114188 Zgc:114188	7955	25
952	21.13	21.26	64.7	IPI00500404.3	si:dkey-98p3.7 Uncharacterized protein	7955	21
953	21.11	21.3	63.3	IPI00506470.1	asah1b Zgc:66026	7955	17
954	21.09	22.45	78	IPI00489142.5	zgc:112282 Uncharacterized protein	7955	19
955	21.08	21.08	75.7	IPI00833505.1	zgc:92357 Uncharacterized protein	7955	22
956	21.07	21.55	65.1	IPI00490675.3	lta4h Uncharacterized protein	7955	15
957	21.06	26.91	82.3	IPI00961090.1	zgc:162938 Zgc:162938 protein	7955	23
958	21.04	45.54	99.6	IPI00483518.2	ywhae1 14-3-3 protein epsilon	7955	50
959	21.04	45.49	57.8	IPI00933220.2	zgc:171967 Uncharacterized protein	7955	36
960	21.02	44.93	72.4	IPI00897502.1	ap1b1 Uncharacterized protein	7955	35
961	21.01	26.59	71.8	IPI00493449.4	lap3 Uncharacterized protein	7955	17
962	21.01	21.39	73	IPI00633656.3	cyp51 Uncharacterized protein	7955	15
963	20.98	26.89	78.1	IPI00493286.1	eif5a Uncharacterized protein	7955	28
964	20.96	21.74	71.4	IPI00882876.1	zgc:172082 Zgc:172082 protein	7955	17
965	20.95	21.69	63.8	IPI01016711.1	afmid Uncharacterized protein	7955	17
966	20.91	21.51	74.9	IPI00480891.2	blvrb;zgc:113340 Uncharacterized protein	7955	21
967	20.91	21.09	73.8	IPI00555330.1	cryz Crystallin, zeta	7955	20
968	20.87	22.05	73.6	IPI00483938.2	srp54 Uncharacterized protein	7955	16
969	20.87	21.17	69	IPI00503661.2	bdh2 3-hydroxybutyrate dehydrogenase type 2	7955	12
970	20.87	21	70	IPI00503692.4	eml2 Uncharacterized protein	7955	20
971	20.86	21.64	81.3	IPI00510029.9	LOC566865 hypothetical LOC566865	7955	17
972	20.86	22.47	67.9	IPI00632982.4	ck2a1 Uncharacterized protein	7955	12
973	20.85	23.44	86.2	IPI00501378.1	rpl19 60S ribosomal protein L19	7955	19
974	20.85	20.96	69.2	IPI00636133.6	plekha6 Uncharacterized protein	7955	18
975	20.81	21.14	75.9	IPI00486311.2	cdc42l Uncharacterized protein	7955	14
976	20.8	21.97	70	IPI00656466.2	arfgap2 Zgc:123303	7955	18
977	20.8	21.67	93.5	IPI00758747.1	zgc:136896 Zgc:136896	7955	22
978	20.78	38	88.6	IPI00501838.2	ywhaqb Uncharacterized protein	7955	45
979	20.76	21.59	69.3	IPI00501377.3	ndufv1 Uncharacterized protein	7955	18
980	20.76	21.02	64.9	IPI00863721.2	si:dkey-7c22.1 Uncharacterized protein	7955	18
981	20.73	28.82	75.8	IPI00490293.1	nucb2b Uncharacterized protein	7955	26
982	20.73	22.44	55.4	IPI00493563.4	capn2a Calpain 2, (M/II) large subunit a	7955	20
983	20.73	23.2	60.4	IPI00890485.1	si:ch211-140f21.1 Novel protein similar to vertebrate complement component 3	7955	26
984	20.67	23.23	88.8	IPI00619777.1	si:ch211-5k11.6 Si:xx-by187g17.5	7955	51
985	20.65	20.75	88	IPI00897674.2	fdx1 Uncharacterized protein	7955	13
986	20.64	22.04	80.4	IPI00513472.1	rps7 40S ribosomal protein S7	7955	15
987	20.62	20.87	77.5	IPI00817192.1	f2 Uncharacterized protein	7955	14
988	20.61	21.25	67.5	IPI00491150.2	eif3m Eukaryotic translation initiation factor 3 subunit M	7955	13
989	20.58	20.89	88.1	IPI00481537.1	zgc:103414 Zgc:103414	7955	15
990	20.57	21.26	91.5	IPI00503585.1	srsf5a Uncharacterized protein	7955	16
991	20.57	20.64	85.9	IPI00511209.2	auh AU RNA binding protein/enoyl-Coenzyme A hydratase	7955	18
992	20.54	20.6	92.4	IPI00511868.2	dap1a Death associated protein 1a	7955	19
993	20.51	43.21	78.4	IPI00513002.1	syncripl Synaptotagmin binding, cytoplasmic RNA interacting protein, like	7955	33
994	20.51	20.66	62.7	IPI00735040.3	si:dkey-53p21.1 Uncharacterized protein	7955	15
995	20.5	21.39	73.3	IPI00501155.2	eef1b2 Uncharacterized protein	7955	19
996	20.48	27.68	90.6	IPI00512788.4	h2afv;h2afz Histone H2A.V	7955	34
997	20.47	94.12	73.9	IPI00834248.2	cltcb Uncharacterized protein	7955	110
998	20.46	20.98	78.6	IPI00491796.2	zgc:63850 Putative hydroxypyruvate isomerase	7955	27
999	20.44	20.59	77.3	IPI01024650.1	idh3b Uncharacterized protein	7955	19
1000	20.41	23.24	56.3	IPI00498815.2	stt3b Uncharacterized protein	7955	19
1001	20.4	20.53	92.5	IPI00511258.4	sdhb Succinate dehydrogenase [ubiquinone] iron-sulfur subunit, mitochondrial	7955	19
1002	20.39	22.67	80.8	IPI00491062.1	zgc:56072 Synaptosomal-associated protein	7955	23
1003	20.35	52.37	98	IPI00494375.1	tpm4 Uncharacterized protein	7955	33
1004	20.35	20.72	88.4	IPI00570311.1	zgc:110843 Zgc:110843	7955	14
1005	20.35	20.43	54.1	IPI00634891.3	as3mt Uncharacterized protein	7955	20
1006	20.34	20.41	74.7	IPI00508268.1	pnp4b Zgc:77825	7955	25
1007	20.33	22.86	89.9	IPI00923296.1	atp5j ATP synthase-coupling factor 6, mitochondrial	7955	25
1008	20.32	20.71	56.3	IPI00993462.1	im:7151655 Uncharacterized protein	7955	23
1009	20.29	20.58	83.8	IPI00499892.1	rpl15 Ribosomal protein L15	7955	13
1010	20.28	20.69	78.5	IPI00512536.2	etf1 Uncharacterized protein	7955	16
1011	20.27	20.51	60	IPI00491874.4	si:ch211-194i4.1 Uncharacterized protein	7955	19
1012	20.22	21.18	86.4	IPI00492347.4	gpx4b glutathione peroxidase 4b	7955	14
1013	20.21	20.67	66	IPI00503715.1	akt2 V-akt murine thymoma viral oncogene homolog 2	7955	13
1014	20.2	24.24	70.9	IPI00511741.2	zgc:66285 Uncharacterized protein	7955	20
1015	20.19	20.34	71.1	IPI00510579.3	dctn2 Dynactin subunit 2	7955	16
1016	20.18	21.63	68.9	IPI00855374.1	ptrfb Uncharacterized protein	7955	17
1017	20.16	20.26	87.9	IPI00868115.1	zgc:171753 Zgc:171753 protein	7955	18
1018	20.14	23.18	67.1	IPI00482185.3	zgc:154042 Zgc:154042	7955	17
1019	20.13	20.57	78.5	IPI00484014.1	rcn3 Reticulocalbin 3, EF-hand calcium binding domain	7955	19
1020	20.12	21.5	76.5	IPI00510588.3	parp3 Poly (ADP-ribose) polymerase family, member 3	7955	18
1021	20.11	20.63	71.6	IPI00654498.4	dkc1 Dyskeratosis congenita 1, dyskerin	7955	20
1022	20.08	21.08	97.3	IPI00497691.1	zgc:77235 Zgc:77235	7955	22
1023	20.08	20.52	59.1	IPI00500326.1	tecrb Uncharacterized protein	7955	14
1024	20.07	120.1	92	IPI00809369.2	zgc:163069 ATP synthase subunit beta	7955	211
1025	20.06	20.1	61.3	IPI00972760.1	cttn Uncharacterized protein	7955	15
1026	20.05	20.18	77.6	IPI00500501.1	ruvbl1 RuvB-like 1	7955	11
1027	20.05	24.04	69.1	IPI00972112.2	myo1bl2 myosin-Ib isoform 2	7955	20
1028	20.02	20.25	71.7	IPI00500645.1	ssr1 Translocon-associated protein alpha	7955	24
1029	20.01	31.61	71.2	IPI00508589.3	ehd3 Uncharacterized protein	7955	25
1030	20	24.86	100	IPI00492068.1	zgc:92631 cytochrome c oxidase subunit VIb-like	7955	23
1031	19.94	19.99	58	IPI00934066.1	f11r Uncharacterized protein	7955	11
1032	19.92	21.69	72.7	IPI00504902.1	ube2n Uncharacterized protein	7955	16
1033	19.89	20.28	66	IPI00492304.4	enpp1 Uncharacterized protein	7955	17
1034	19.88	22.92	85.5	IPI00607409.1	fkbp3 FK506 binding protein 3	7955	16
1035	19.88	20.06	62.5	IPI00834420.2	cpb1 Uncharacterized protein	7955	16
1036	19.87	20.56	58.7	IPI00919835.2	add3a Uncharacterized protein	7955	13
1037	19.86	20.04	65.9	IPI00802282.5	phka1 phosphorylase b kinase regulatory subunit alpha, skeletal muscle isoform	7955	20
1038	19.83	20.1	75.2	IPI00570288.2	zgc:110137 complement component 1 Q subcomponent-binding protein, mitochondrial	7955	17
1039	19.82	33.3	63.7	IPI00809962.2	atp2a1l Uncharacterized protein	7955	30
1040	19.8	20.94	55	IPI00500869.3	sec23a Protein transport protein Sec23A	7955	16
1041	19.8	35.49	77.9	IPI00758910.3	h2afy Histone H2A	7955	28
1042	19.77	19.9	59.9	IPI00972647.2	vars valyl-tRNA synthetase	7955	24
1043	19.73	21.27	69.8	IPI00612197.1	zgc:110460 Eukaryotic translation initiation factor 2A	7955	22
1044	19.72	19.99	49.2	IPI00507228.4	si:ch73-252g14.4 Uncharacterized protein	7955	10
1045	19.7	19.92	68.4	IPI00786679.2	farsa Phenylalanyl-tRNA synthetase alpha chain	7955	13
1046	19.68	19.98	64.7	IPI00810070.4	apom Uncharacterized protein	7955	12
1047	19.65	19.82	72.8	IPI00483771.3	pcyt2 Uncharacterized protein	7955	14
1048	19.62	20.92	55.7	IPI00490079.4	agpat3 Uncharacterized protein	7955	14
1049	19.62	20.95	74.8	IPI00608258.2	bckdk Uncharacterized protein	7955	23
1050	19.59	59.53	78.6	IPI00491820.2	hsp90a.2 Uncharacterized protein	7955	68
1051	19.53	20.57	65.5	IPI00484656.3	zgc:136773 Uncharacterized protein	7955	18
1052	19.53	20.15	62	IPI00504031.1	zgc:100824 Diphosphomevalonate decarboxylase	7955	15
1053	19.52	19.79	73.3	IPI00803402.1	zgc:154041 Elongation factor G, mitochondrial	7955	18
1054	19.5	20.2	61.7	IPI00491192.2	tbxas1 Uncharacterized protein	7955	16
1055	19.47	19.68	68.4	IPI00513236.1	sec13 Uncharacterized protein	7955	15
1056	19.41	19.94	53.4	IPI00996528.1	lratb Uncharacterized protein	7955	25
1057	19.35	20.48	90.7	IPI00500296.3	ak4 Zgc:85790	7955	15
1058	19.32	19.89	69.1	IPI00771585.3	zgc:158446 Zgc:158446 protein	7955	25
1059	19.29	22.79	88	IPI00972787.1	si:dkey-236e20.2 Uncharacterized protein	7955	18
1060	19.27	19.94	62	IPI00501085.2	galm Zgc:92501	7955	19
1061	19.26	19.39	69.3	IPI00513129.2	shbg sex hormone binding globulin	7955	11
1062	19.25	19.46	53.1	IPI00511389.3	rcc1 Uncharacterized protein	7955	14
1063	19.25	19.3	63.3	IPI00864674.3	LOC565774 Uncharacterized protein	7955	23
1064	19.2	20	60.7	IPI00482884.1	scrn3 Secernin-3	7955	16
1065	19.19	19.41	67.5	IPI00963217.2	LOC100333757 Uncharacterized protein	7955	17
1066	19.17	19.5	69.3	IPI00506325.8	prkar2aa protein kinase, cAMP-dependent, regulatory, type II, alpha A	7955	10
1067	19.16	19.32	65.3	IPI00800211.5	myo18l1 myosin-XVIIIa	7955	22
1068	19.15	19.25	53.8	IPI00972117.1	ctrb1 Uncharacterized protein	7955	24
1069	19.13	19.38	73.3	IPI00934647.1	capg Capg protein (Fragment)	7955	17
1070	19.13	21.8	56	IPI01005197.1	si:dkeyp-118h9.7 Uncharacterized protein (Fragment)	7955	31
1071	19.07	58.84	94	IPI01004772.1	LOC100538287 fumarylacetoacetase-like, partial	7955	90
1072	19.04	19.09	80.4	IPI00497458.2	zgc:112315 Glyoxalase domain-containing protein 5	7955	11
1073	19.04	25.12	77.2	IPI00500260.1	ppm1bb Uncharacterized protein	7955	22
1074	19.03	19.06	71.2	IPI00492181.2	ndufb10 Ndufb10 protein	7955	12
1075	19.03	19.26	85	IPI00513554.1	nudc Nudc protein	7955	13
1076	19.03	19.05	77	IPI00608907.1	LOC567638 Uncharacterized protein	7955	13
1077	18.98	19.61	77.2	IPI00485013.1	snx3 Uncharacterized protein	7955	11
1078	18.98	19.07	52.9	IPI00858566.3	acot11 Uncharacterized protein	7955	14
1079	18.93	19.4	73.6	IPI00486693.1	slc9a3r1 Solute carrier family 9 (Sodium/hydrogen exchanger), isoform 3 regulatory factor 2	7955	14
1080	18.93	21.19	65.2	IPI00496595.1	aspdh Putative L-aspartate dehydrogenase	7955	21
1081	18.93	18.99	66.7	IPI00507989.1	zgc:85680 Zgc:85680	7955	14
1082	18.9	19.33	73.9	IPI00994320.2	zgc:85683 Uncharacterized protein	7955	15
1083	18.89	19.09	54.6	IPI00507502.1	mhc1uaa Mhc-UAA (Fragment)	7955	16
1084	18.87	19.1	65.1	IPI00492948.3	sps2 selenophosphate synthetase 2	7955	13
1085	18.87	19.05	67.8	IPI00500261.4	hspb1 Uncharacterized protein	7955	11
1086	18.87	21.45	91.3	IPI00513099.2	zgc:86599 Zgc:86599	7955	19
1087	18.82	19.04	87	IPI00498583.2	wars Tryptophanyl-tRNA synthetase	7955	12
1088	18.81	35.43	74.9	IPI00501333.4	si:dkey-151c10.1 Uncharacterized protein	7955	52
1089	18.8	18.99	74.8	IPI00491502.5	myo1d myosin-Id	7955	17
1090	18.79	18.97	62.9	IPI00495619.3	khk Ketohexokinase	7955	10
1091	18.78	26.08	63.8	IPI00496998.2	dhdhl Dihydrodiol dehydrogenase (Dimeric), like	7955	25
1092	18.72	19.02	74.4	IPI00614245.3	naa15a NMDA receptor-regulated gene 1a	7955	15
1093	18.71	18.76	74.5	IPI00486287.4	parp1 Uncharacterized protein	7955	13
1094	18.7	20.88	100	IPI00499132.2	pcbd1 Uncharacterized protein	7955	25
1095	18.67	19.03	73.6	IPI00488768.1	cnn3a Uncharacterized protein	7955	15
1096	18.66	21.08	79.5	IPI00483805.1	zgc:73198 Zgc:73198	7955	16
1097	18.66	19.35	60.8	IPI00511423.5	zgc:153038 Zgc:153038	7955	14
1098	18.65	18.84	61.7	IPI00494461.5	dnajb11 Uncharacterized protein	7955	13
1099	18.65	18.81	76.7	IPI00971826.1	ube2l3 Uncharacterized protein	7955	14
1100	18.64	18.99	78.4	IPI00923195.1	zgc:109981 probable thiopurine S-methyltransferase	7955	11
1101	18.62	18.73	68.7	IPI00901804.2	LOC568857 Uncharacterized protein	7955	19
1102	18.61	19.88	81.4	IPI00482708.3	nccrp1 nonspecific cytotoxic cell receptor protein 1	7955	14
1103	18.6	18.78	87.9	IPI01023720.1	rps25 15 kDa protein	7955	16
1104	18.59	19.74	89	IPI00817594.1	tpd52l2b Uncharacterized protein	7955	11
1105	18.58	18.63	57.1	IPI00898683.3	tjp1 Uncharacterized protein	7955	19
1106	18.57	19.1	76	IPI00650616.2	gmds Uncharacterized protein	7955	14
1107	18.56	18.61	54.3	IPI00493312.4	clint1 Uncharacterized protein	7955	16
1108	18.56	18.71	53.9	IPI00509958.1	stxbp3 Syntaxin binding protein 3	7955	13
1109	18.51	18.73	62.4	IPI00554382.4	lipf Uncharacterized protein	7955	19
1110	18.5	18.93	82.4	IPI00481565.7	im:7148243 Uncharacterized protein	7955	16
1111	18.49	18.72	53.2	IPI00607441.1	ncl1 Isoform 2 of Nicalin-1	7955	14
1112	18.47	18.66	91.4	IPI00483990.3	zgc:86706 Cytochrome c	7955	22
1113	18.47	25.15	81.1	IPI01004532.1	LOC100536066 spectrin beta chain, brain 1-like	7955	22
1114	18.46	18.6	55.1	IPI00497501.1	gart Phosphoribosylglycinamide formyltransferase	7955	14
1115	18.44	19.83	68.3	IPI00510088.4	bpnt1 Uncharacterized protein	7955	18
1116	18.43	35.79	91	IPI00503481.1	ywhaqa Uncharacterized protein	7955	40
1117	18.42	18.65	58.7	IPI00608319.1	polr2a DNA-directed RNA polymerase II subunit RPB1 isoform 1	7955	20
1118	18.41	18.96	94.5	IPI00501108.1	skp1 Uncharacterized protein	7955	13
1119	18.36	18.8	75.2	IPI00928780.1	pfn1 Uncharacterized protein	7955	14
1120	18.34	18.46	70.4	IPI00488184.1	hsd17b12b Estradiol 17-beta-dehydrogenase 12-B	7955	14
1121	18.34	18.68	62.5	IPI00488664.1	cse1l Exportin-2	7955	18
1122	18.34	18.36	72	IPI00488705.1	dnaja3a Uncharacterized protein	7955	11
1123	18.3	18.44	72.7	IPI00616384.2	smc3 Uncharacterized protein	7955	22
1124	18.3	18.37	76.7	IPI00962022.3	LOC100332457 NACHT, LRR and PYD domains-containing protein 1-like	7955	23
1125	18.28	18.47	73.3	IPI00508239.3	pcyt1aa Uncharacterized protein	7955	11
1126	18.27	19.7	81.4	IPI00498877.1	zgc:66350 Zgc:66350	7955	20
1127	18.26	19.26	81.3	IPI00993325.3	mpp6a Uncharacterized protein	7955	13
1128	18.25	19.19	76.7	IPI00484719.1	eif5 Uncharacterized protein	7955	14
1129	18.25	18.26	59.4	IPI00962364.1	LOC100330524 putative protein phosphatase 1 regulatory inhibitor subunit 3G-like	7955	13
1130	18.24	18.33	61.7	IPI00902354.1	LOC792854 hypothetical protein LOC792854	7955	13
1131	18.23	18.38	65.1	IPI00510266.1	tmed10 Uncharacterized protein	7955	15
1132	18.2	18.23	65.8	IPI00628114.2	zgc:92326 Uncharacterized protein	7955	20
1133	18.17	18.41	70.6	IPI00770460.1	actr1 Zgc:56317 protein	7955	12
1134	18.12	18.17	99	IPI00493072.2	zgc:112340 NADH dehydrogenase [ubiquinone] 1 alpha subcomplex subunit 2	7955	17
1135	18.12	18.19	60.3	IPI00505079.2	eif3s2 Eukaryotic translation initiation factor 3 subunit I	7955	12
1136	18.1	18.58	67	IPI00851601.2	phex Uncharacterized protein	7955	16
1137	18.09	18.21	74.9	IPI00614827.3	idh3g Uncharacterized protein	7955	17
1138	18.08	18.8	74.8	IPI00638503.2	zgc:85975 Zgc:85975	7955	10
1139	18.07	23.26	52	IPI00995086.1	- Uncharacterized protein	7955	22
1140	18.06	18.3	64.1	IPI00901363.1	LOC558050 amine oxidase [flavin-containing] A-like	7955	14
1141	18.05	97.12	74.2	IPI00861872.3	krt5 Uncharacterized protein	7955	164
1142	18.04	18.17	64.7	IPI00492664.3	rps20 Uncharacterized protein	7955	13
1143	18.04	18.17	62.9	IPI00505774.4	cdh17 Cadherin 17, LI cadherin	7955	19
1144	18.02	20.77	72.8	IPI00509542.2	psma4 Proteasome subunit alpha type	7955	12
1145	18.01	21.75	85.2	IPI00494078.2	si:ch211-103n10.5 Uncharacterized protein	7955	18
1146	18.01	18.11	49.2	IPI00496799.1	sec31a Protein transport protein Sec31A	7955	16
1147	18.01	18.5	56.9	IPI01007230.1	LOC100538000 bifunctional protein NCOAT-like	7955	16
1148	18	21.65	88.7	IPI00851956.1	atp5i Atp5i protein	7955	26
1149	17.99	19.1	61	IPI00504468.3	agt Angiotensinogen	7955	12
1150	17.92	18.03	60.5	IPI00512091.4	tgm2b Tgm2b protein	7955	14
1151	17.9	18.05	50	IPI00502776.3	crot Zgc:110643	7955	13
1152	17.87	17.99	72	IPI00500209.3	eif3g Eukaryotic translation initiation factor 3 subunit G	7955	14
1153	17.87	20.46	52.9	IPI00899477.1	LOC553338 LOC553338 protein (Fragment)	7955	17
1154	17.86	18.37	59.9	IPI00609325.4	prkcsh Protein kinase C substrate 80K-H	7955	14
1155	17.85	18.08	59.1	IPI00995287.1	sept9a Sept9a_tv2	7955	10
1156	17.84	21.07	77.5	IPI00490609.2	zgc:92237 40S ribosomal protein S6	7955	16
1157	17.82	17.85	63.6	IPI00610552.2	mettl7a Zgc:153889	7955	10
1158	17.79	18.41	64.1	IPI00507997.3	vat1 Synaptic vesicle membrane protein VAT-1 homolog	7955	19
1159	17.79	36.42	70.2	IPI00861259.3	aldh1l2 Uncharacterized protein	7955	29
1160	17.77	18.6	87.3	IPI00486202.3	isoc2 Isochorismatase domain-containing protein 2, mitochondrial	7955	18
1161	17.76	17.96	88.3	IPI00494165.2	pecr Uncharacterized protein	7955	11
1162	17.73	21.53	75.1	IPI00901333.1	si:dkey-79f11.10 interferon-induced protein 44	7955	17
1163	17.71	17.86	85.7	IPI00493625.1	zgc:92872 Ribosomal protein L18	7955	15
1164	17.71	18.98	70.8	IPI00499030.2	tia1l TIA1 cytotoxic granule-associated RNA binding protein	7955	19
1165	17.69	17.72	61.4	IPI00481638.3	si:dkey-183n20.16 Uncharacterized protein	7955	14
1166	17.69	17.82	79	IPI00866636.2	zgc:77082 Probable 4-hydroxy-2-oxoglutarate aldolase, mitochondrial	7955	16
1167	17.68	20.04	57.9	IPI00504630.2	pepd Pepd protein	7955	14
1168	17.64	17.71	73.1	IPI00484493.1	zgc:77675 WD repeat-containing protein 61	7955	12
1169	17.64	17.76	67.9	IPI00485604.4	zgc:162544 Uncharacterized protein	7955	16
1170	17.64	18.57	62.4	IPI00494539.1	zgc:77938 Zgc:77938	7955	13
1171	17.62	22.8	65.2	IPI00995563.1	ugt1b4 Uncharacterized protein	7955	21
1172	17.61	18.28	75.5	IPI00810161.2	ptmab Prothymosin alpha-B	7955	20
1173	17.6	20.62	64.1	IPI00497977.2	umps Uncharacterized protein	7955	16
1174	17.58	19.34	73.8	IPI00498508.2	ctage5 CTAGE family, member 5	7955	14
1175	17.55	27.8	65.7	IPI00899068.4	LOC100330645 heterogeneous nuclear ribonucleoprotein U-like protein 1-like	7955	25
1176	17.53	17.94	69.3	IPI00492723.1	dnm1l Dynamin-1-like protein	7955	13
1177	17.5	19	61.4	IPI00489625.2	hsd3b7 Hydroxy-delta-5-steroid dehydrogenase, 3 beta-and steroid delta-isomerase	7955	24
1178	17.49	17.5	93.3	IPI00611348.2	uqcrh ubiquinol-cytochrome c reductase hinge protein	7955	11
1179	17.48	17.73	60.3	IPI00510681.5	cdh2 Cadherin-2	7955	19
1180	17.45	17.78	72.9	IPI00804423.3	gpd2 Uncharacterized protein	7955	18
1181	17.44	18.68	64.9	IPI00882619.3	abcd1 Uncharacterized protein	7955	15
1182	17.43	18.2	66.9	IPI00862062.2	zgc:171525 Zgc:171525 protein	7955	15
1183	17.42	17.94	60.9	IPI00770086.2	si:ch211-198n5.11 Uncharacterized protein	7955	14
1184	17.41	18.64	60	IPI00804011.2	prkaa1 Uncharacterized protein	7955	13
1185	17.41	17.9	60.4	IPI00851362.1	tmed9 Uncharacterized protein	7955	15
1186	17.4	17.84	73.5	IPI00497294.1	lygl1 Zgc:92608	7955	20
1187	17.36	17.48	67.6	IPI00509620.3	zgc:64031 Zgc:64031	7955	12
1188	17.34	18.77	68.4	IPI00994585.1	hsd11b3;LOC100006793 Uncharacterized protein	7955	15
1189	17.33	19.57	70.6	IPI00638238.5	myo6a Uncharacterized protein	7955	18
1190	17.32	27.63	90.7	IPI00507604.1	zgc:56493 Thioredoxin	7955	32
1191	17.31	19.7	63.8	IPI00483359.3	abcb7 Uncharacterized protein	7955	13
1192	17.31	18.02	66.3	IPI00488752.3	samm50 Sorting and assembly machinery component 50 homolog A	7955	12
1193	17.3	17.45	91.2	IPI00490551.3	rpl27 60S ribosomal protein L27	7955	17
1194	17.29	18.28	58.6	IPI00806969.3	pm20d1.2 Probable carboxypeptidase PM20D1.2	7955	13
1195	17.28	28.36	83.3	IPI00481285.3	eif4a3 Eukaryotic initiation factor 4A-III	7955	16
1196	17.28	17.4	68.7	IPI00488659.4	osgep probable O-sialoglycoprotein endopeptidase	7955	10
1197	17.28	17.4	71.6	IPI00494569.4	prps1a Ribose-phosphate pyrophosphokinase	7955	11
1198	17.22	20.3	58.3	IPI00484612.2	mtch2 Uncharacterized protein	7955	17
1199	17.22	22.66	86.4	IPI00487156.3	capns1b Capns1b protein	7955	18
1200	17.21	17.47	97.3	IPI00507878.2	pvalb4 Uncharacterized protein	7955	11
1201	17.17	19.43	70	IPI00512644.2	hnrnph1l Zgc:85960	7955	12
1202	17.17	23.49	62.4	IPI00829009.4	LOC100333590 Uncharacterized protein	7955	23
1203	17.15	17.36	67.3	IPI00877439.1	scly Zgc:171514 protein	7955	12
1204	17.14	21.59	88.7	IPI00488248.1	mylz3 Uncharacterized protein	7955	22
1205	17.14	17.2	96.4	IPI00494058.3	zgc:101826 Zgc:101826 protein	7955	13
1206	17.14	17.33	98.6	IPI00507931.1	zgc:85717 Zgc:85717	7955	11
1207	17.14	17.19	75.5	IPI00863973.3	col6a2 Uncharacterized protein	7955	11
1208	17.11	23.69	59.9	IPI00504915.4	zgc:171945 Zgc:171945 protein	7955	19
1209	17.11	18.01	52.1	IPI00810229.2	zgc:152873 Protein KIAA0664 homolog	7955	23
1210	17.09	17.88	82.1	IPI00482198.3	LOC402880 cytochrome c oxidase subunit 4 isoform 2, mitochondrial	7955	14
1211	17.07	17.46	86.4	IPI00511181.1	zgc:91845 Zgc:91845	7955	12
1212	17.06	17.96	72.1	IPI00489258.1	pfn2 Uncharacterized protein	7955	16
1213	17.04	17.11	64.7	IPI00868258.3	si:dkey-18l1.1 Uncharacterized protein KIAA0564 homolog	7955	22
1214	17.03	17.24	84.6	IPI00497806.3	btf3 Uncharacterized protein	7955	12
1215	16.98	17	51	IPI00497243.3	zgc:65788 Zgc:65788	7955	11
1216	16.93	17.24	67.6	IPI00497814.1	ptmaa Prothymosin alpha-A	7955	22
1217	16.93	20.58	86.5	IPI00650295.1	eef1db elongation factor-1, delta, b isoform 2	7955	16
1218	16.92	17.09	65.4	IPI00934559.2	zgc:56466 protein NipSnap homolog 3A	7955	17
1219	16.87	17.05	61.1	IPI00499762.4	si:dkey-4e7.3 inosine-uridine preferring nucleoside hydrolase isoform 1	7955	13
1220	16.87	17.03	72.5	IPI00501560.1	g3bp1 Uncharacterized protein	7955	12
1221	16.82	16.99	58.8	IPI00508578.2	hmgcl 3-hydroxymethyl-3-methylglutaryl-Coenzyme A lyase	7955	11
1222	16.82	16.87	41.3	IPI00901134.1	si:ch211-67f24.5 Uncharacterized protein	7955	12
1223	16.8	17.27	69.6	IPI00485885.2	txnl1 Uncharacterized protein	7955	15
1224	16.79	16.85	52	IPI00500451.1	nup155 Nucleoporin 155	7955	16
1225	16.77	17.64	71.9	IPI00497198.1	zgc:136952 60S ribosomal protein L32	7955	21
1226	16.76	50.63	71.8	IPI00509685.3	eif4a1b Eif4a1b protein	7955	40
1227	16.75	17.11	69.9	IPI00485380.2	ddi2 Isoform 2 of Protein DDI1 homolog 2	7955	9
1228	16.73	17.51	93.9	IPI00509732.5	rpl12 Ribosomal protein L12	7955	19
1229	16.71	16.73	95.9	IPI00497575.3	ndufa12 NADH dehydrogenase (ubiquinone) 1 alpha subcomplex, 12	7955	13
1230	16.7	17.39	64.7	IPI00495409.1	zgc:103652 Zgc:103652	7955	10
1231	16.69	16.86	75.5	IPI00509779.1	cdc37 Cell division cycle 37 homolog	7955	12
1232	16.69	44.09	77	IPI00998720.1	ezr Uncharacterized protein (Fragment)	7955	30
1233	16.67	16.86	68.1	IPI00498432.2	vil1l Villin 1 like	7955	13
1234	16.67	17.29	63.9	IPI00863581.2	sly1 Uncharacterized protein	7955	16
1235	16.64	17.4	91.9	IPI00570286.1	zgc:112425 Zgc:112425	7955	21
1236	16.64	17.01	69.4	IPI00961189.3	LOC100334992 interferon-induced guanylate-binding protein 1-like	7955	12
1237	16.63	16.66	49	IPI00491565.1	upf1 Upf1 regulator of nonsense transcripts homolog	7955	11
1238	16.62	16.88	91.5	IPI00505229.1	hsd17b10 Uncharacterized protein	7955	12
1239	16.61	16.69	65.8	IPI00495779.3	srp68 Uncharacterized protein	7955	16
1240	16.56	23.58	66	IPI00502192.2	hnrpl Zgc:55429	7955	24
1241	16.56	46.04	80.5	IPI00996803.1	mat2a S-adenosylmethionine synthase	7955	56
1242	16.53	16.57	66.5	IPI00510723.1	ndufb8 Uncharacterized protein	7955	14
1243	16.52	16.55	56.9	IPI00497025.2	plaa Phospholipase A2-activating protein	7955	11
1244	16.51	16.68	42.9	IPI00861023.3	LOC100000526 Uncharacterized protein	7955	13
1245	16.49	16.64	78.4	IPI00515988.1	sat2 Uncharacterized protein	7955	15
1246	16.48	16.54	57.4	IPI00771498.2	hspb8 Uncharacterized protein	7955	10
1247	16.47	16.54	69.6	IPI00492298.2	zgc:101569 Uncharacterized protein	7955	12
1248	16.44	16.74	68.9	IPI00487997.2	ssrp1a Uncharacterized protein	7955	18
1249	16.43	17.38	55.5	IPI00511826.2	zgc:92231 Uncharacterized protein	7955	15
1250	16.41	21.22	77.7	IPI00995382.1	zgc:77366 Zgc:77366	7955	18
1251	16.4	21.09	71.5	IPI00489762.3	hnrnpa0l Uncharacterized protein	7955	21
1252	16.4	16.45	75.5	IPI00960374.2	LOC100334014 prolyl endopeptidase-like, partial	7955	9
1253	16.39	16.45	53.4	IPI00995056.1	psap Uncharacterized protein	7955	19
1254	16.36	16.46	60.2	IPI00612907.3	si:dkeyp-110g5.2 Uncharacterized protein	7955	15
1255	16.35	16.47	74.2	IPI00512329.3	pdlim1 Uncharacterized protein	7955	12
1256	16.33	18.93	87	IPI00493186.1	rab14;LOC100332590 Uncharacterized protein	7955	15
1257	16.31	16.46	70.7	IPI00499741.2	asns Asparagine synthetase	7955	12
1258	16.29	16.76	75.8	IPI00770704.1	pnpo pyridoxine-5'-phosphate oxidase	7955	15
1259	16.27	16.73	68.9	IPI00509513.2	aprt Aprt protein	7955	12
1260	16.23	16.36	61.1	IPI00650844.2	bsg Uncharacterized protein	7955	11
1261	16.22	16.85	57.9	IPI00998029.1	si:dkey-13f9.5 Uncharacterized protein	7955	11
1262	16.21	16.32	80.2	IPI00488890.6	eif4bb Uncharacterized protein	7955	14
1263	16.21	16.48	69.3	IPI00501955.1	zgc:85963;epb4.1l3 Zgc:85963	7955	13
1264	16.21	17.04	68.7	IPI00502058.5	uchl5 Ubiquitin carboxyl-terminal hydrolase L5	7955	17
1265	16.2	16.34	73.7	IPI00486166.1	ruvbl2 RuvB-like 2	7955	9
1266	16.19	16.4	61.2	IPI00483976.2	cyp2u1 Uncharacterized protein	7955	12
1267	16.19	16.74	74.6	IPI01004884.1	srpr signal recognition particle receptor subunit alpha isoform 1	7955	14
1268	16.18	17.18	75.2	IPI00481150.4	clpp ATP-dependent Clp protease proteolytic subunit	7955	13
1269	16.16	16.7	91.4	IPI00505432.3	zgc:86762 Zgc:86762	7955	12
1270	16.16	16.19	62.9	IPI00507909.2	bag3 Uncharacterized protein	7955	12
1271	16.16	16.55	81	IPI00555449.1	zgc:114172 Zgc:114172	7955	15
1272	16.15	16.27	58.3	IPI00769353.2	fnta farnesyltransferase, CAAX box, alpha	7955	11
1273	16.14	16.82	61.5	IPI00483806.1	gnb1l;LOC100537780 Uncharacterized protein	7955	14
1274	16.14	16.55	71.9	IPI01024102.1	ddx1 Uncharacterized protein	7955	16
1275	16.13	16.55	100	IPI00486411.1	rps21 40S ribosomal protein S21	7955	13
1276	16.12	17.66	93.8	IPI00502862.1	rpl21 Uncharacterized protein	7955	20
1277	16.12	16.32	67.3	IPI00871019.1	faah Fatty acid amide hydrolase	7955	12
1278	16.11	20.1	81	IPI00902029.1	LOC557507 apoptosis-inducing factor, mitochondrion-associated 2	7955	16
1279	16.1	16.25	61.1	IPI00482386.2	zgc:63938 Zgc:63938	7955	11
1280	16.1	17.01	61.8	IPI00771697.1	zgc:136978 Zgc:136978	7955	12
1281	16.09	16.88	68.5	IPI00490303.1	zgc:73210 Zgc:73210	7955	14
1282	16.09	17.85	65.2	IPI00931548.2	tprb Uncharacterized protein	7955	21
1283	16.09	16.53	73.3	IPI00934945.1	LOC557270 eukaryotic translation initiation factor 3, subunit F-like	7955	11
1284	16.08	16.79	60.9	IPI00866101.2	puf60b Isoform 2 of Poly(U)-binding-splicing factor PUF60-B	7955	14
1285	16.07	16.17	59.7	IPI00487160.1	ccdc47 Coiled-coil domain-containing protein 47	7955	13
1286	16.06	16.94	79.1	IPI00500650.2	ndufs6 Uncharacterized protein	7955	14
1287	16.05	16.16	68.9	IPI00486203.1	sult6b1 Sulfotransferase	7955	12
1288	16.01	33.67	81.8	IPI00485049.2	rpl5a Uncharacterized protein	7955	22
1289	16.01	16.23	75.2	IPI00833670.1	rbks Ribokinase	7955	13
1290	16	18.53	62.8	IPI00481924.3	zgc:63562 E3 UFM1-protein ligase 1	7955	14
1291	16	16.26	68.8	IPI00508105.3	si:ch211-154o6.6 Si:ch211-154o6.6 protein	7955	13
1292	15.99	16.12	93.2	IPI00500619.1	rpl18a 60S ribosomal protein L18a	7955	10
1293	15.97	16.12	42.2	IPI00482453.1	rad23b RAD23 homolog B	7955	9
1294	15.95	16.11	73.2	IPI00487389.1	zgc:63505 Zgc:63505	7955	13
1295	15.95	16.65	56.6	IPI00934751.1	LOC563343 Uncharacterized protein	7955	12
1296	15.94	26.57	65.4	IPI01027893.1	si:dkey-28b4.8 sarcoplasmic/endoplasmic reticulum calcium ATPase 2	7955	21
1297	15.93	16.97	57	IPI00482227.2	prp19 Uncharacterized protein	7955	11
1298	15.89	15.94	53	IPI00852062.1	si:dkey-183c16.7 Novel protein	7955	12
1299	15.87	16.07	73.8	IPI00995237.1	- Uncharacterized protein	7955	26
1300	15.85	15.92	58.3	IPI00496220.2	epb41 Uncharacterized protein	7955	18
1301	15.85	28.04	77.3	IPI00507762.2	psmd11b Psmd11b protein	7955	20
1302	15.84	18.01	89	IPI00851858.1	hmgb3b Uncharacterized protein	7955	16
1303	15.83	15.86	55.9	IPI00803313.4	- Uncharacterized protein	7955	12
1304	15.83	16.72	75.5	IPI00871008.1	zgc:174895 Zgc:174895 protein	7955	13
1305	15.82	16.24	81	IPI00494483.2	hars Uncharacterized protein	7955	13
1306	15.81	16.18	61.4	IPI00513006.5	macf1 Uncharacterized protein	7955	17
1307	15.78	16.34	75.8	IPI00499735.3	hibch Uncharacterized protein	7955	12
1308	15.77	17.99	83.1	IPI00502509.2	mtpn Myotrophin	7955	16
1309	15.75	15.75	100	IPI00483018.1	LOC100330344;ndufa4l NADH dehydrogenase (Ubiquinone) 1 alpha subcomplex 4, like	7955	15
1310	15.75	16.12	55.9	IPI00919782.2	acss2 Uncharacterized protein	7955	10
1311	15.74	18.03	63.7	IPI00506469.2	arpc1b Uncharacterized protein	7955	12
1312	15.72	48.13	86.4	IPI00497388.2	ckbb Creatine kinase, brain b	7955	45
1313	15.68	16.83	63.1	IPI00505445.4	kng1 Uncharacterized protein	7955	11
1314	15.64	15.84	59.7	IPI01023434.1	LOC569706 Uncharacterized protein	7955	16
1315	15.63	15.7	72.7	IPI00923221.1	si:dkeyp-75b4.10 Uncharacterized protein	7955	24
1316	15.61	15.7	76.8	IPI00503403.2	tbl2;LOC100538055 Uncharacterized protein	7955	12
1317	15.61	15.73	63.9	IPI00611142.2	sirt3 Uncharacterized protein	7955	10
1318	15.6	18.15	64.1	IPI00855526.2	zgc:101699 Zgc:101699	7955	14
1319	15.58	15.97	68.2	IPI00963003.2	LOC100333777 Uncharacterized protein	7955	17
1320	15.57	17.93	57.3	IPI00863756.2	itih3 Inter-alpha (Globulin) inhibitor H3	7955	13
1321	15.56	15.6	62.1	IPI00488133.3	flii Uncharacterized protein	7955	15
1322	15.54	16.29	83.7	IPI00486526.6	zgc:85763 Uncharacterized protein	7955	16
1323	15.52	16.59	61.5	IPI00485415.1	sirt2 NAD-dependent deacetylase sirtuin-2	7955	10
1324	15.51	15.69	61.8	IPI00503489.3	si:ch211-222e23.8 Phosphatidylinositide phosphatase SAC1-B	7955	13
1325	15.5	18.71	72	IPI00960832.2	si:ch211-236l14.3 Uncharacterized protein	7955	19
1326	15.49	15.69	67.2	IPI00504006.1	sara2 Uncharacterized protein	7955	13
1327	15.46	16.02	54.7	IPI00501330.2	nploc4 Uncharacterized protein	7955	13
1328	15.46	15.46	80.9	IPI00501774.2	cox7a2l Uncharacterized protein	7955	15
1329	15.45	15.91	74.4	IPI00511849.3	fahd1 Zgc:109929	7955	8
1330	15.45	16.3	66.1	IPI00800873.3	psmd14 Zgc:162272 protein	7955	15
1331	15.43	15.59	52.9	IPI00481955.1	prpf39 Pre-mRNA-processing factor 39	7955	20
1332	15.38	15.58	65.4	IPI00504400.3	mospd2 Uncharacterized protein	7955	11
1333	15.37	15.57	59.3	IPI00509899.4	pdcd4a Programmed cell death 4a	7955	9
1334	15.35	16	81.9	IPI00497529.1	vapb Vesicle-associated membrane protein, associated protein B and C	7955	11
1335	15.35	18.83	87.6	IPI00963002.4	hnrnpk Uncharacterized protein	7955	16
1336	15.34	15.71	94.9	IPI00486130.2	rpl28l Rpl28l protein	7955	15
1337	15.33	55.21	73.1	IPI00503124.3	tuba8l Tubulin, alpha 8 like	7955	68
1338	15.32	17.35	62.2	IPI00503601.1	sec23b Sec23-like protein B	7955	17
1339	15.32	15.46	64.4	IPI00998964.1	acbd5a Uncharacterized protein	7955	15
1340	15.31	15.77	63.1	IPI00961349.1	ptpn11 Protein tyrosine phosphatase, non-receptor type 11	7955	15
1341	15.3	17.34	62.8	IPI00502942.6	itgb1b Integrin beta	7955	18
1342	15.3	15.81	56.5	IPI00993985.1	s100a10b Uncharacterized protein (Fragment)	7955	17
1343	15.29	15.89	70	IPI00503225.2	gna13a Guanine nucleotide binding protein (G protein), alpha 13a	7955	14
1344	15.29	15.71	67.3	IPI00510493.1	pitpnb Phosphotidylinositol transfer protein, beta	7955	12
1345	15.28	21.07	72.4	IPI00509524.1	vdac1 Voltage-dependent anion channel 1	7955	13
1346	15.25	15.48	65.2	IPI00993242.1	zgc:66317 Uncharacterized protein	7955	13
1347	15.23	23.01	61.7	IPI00772606.2	aldh3a2 Aldehyde dehydrogenase	7955	18
1348	15.13	15.88	70.2	IPI00500448.3	pafah1b1a Lissencephaly-1 homolog A	7955	17
1349	15.13	15.96	74.8	IPI00509324.1	ppp2cb Serine/threonine-protein phosphatase	7955	16
1350	15.12	15.95	69.9	IPI00504670.2	zgc:92746 Zgc:92746 protein	7955	11
1351	15.11	15.25	68.9	IPI00507263.1	cab39l Uncharacterized protein	7955	7
1352	15.11	16.52	96.6	IPI00851874.1	acbd7 acyl-CoA-binding domain-containing protein 7	7955	16
1353	15.09	17.56	73.6	IPI00481612.4	sept6 Uncharacterized protein	7955	13
1354	15.08	15.21	89.8	IPI00493602.2	atp6v1g1 Uncharacterized protein	7955	12
1355	15.08	15.48	47.4	IPI00612480.3	si:dkey-7c22.2 e3 ubiquitin-protein ligase UBR4	7955	28
1356	15.07	101.46	98	IPI00554412.2	ba2;ba2l;ba1l;ba1 Hemoglobin subunit beta-2	7955	310
1357	15.06	15.12	64.7	IPI00758797.1	gmpr2;zgc:136869 GMP reductase	7955	12
1358	15.04	28.78	71.1	IPI00501048.3	ehd1 Uncharacterized protein	7955	23
1359	14.98	16.39	58.2	IPI00485345.1	camk2d1 Isoform G of Calcium/calmodulin-dependent protein kinase type II delta 1 chain	7955	12
1360	14.97	16.06	64.3	IPI00876762.2	rpz5 Rapunzel5	7955	16
1361	14.95	15.26	56.5	IPI00919839.2	glsb Uncharacterized protein	7955	14
1362	14.91	15.43	62	IPI00494273.2	zgc:65960 Zgc:65960 protein	7955	12
1363	14.89	15.11	62	IPI00510557.2	pcmt Protein-L-isoaspartate O-methyltransferase	7955	8
1364	14.87	15.3	69	IPI00495931.2	tha1 Zgc:91912	7955	15
1365	14.87	14.96	96.2	IPI00612846.2	rps24 40S ribosomal protein S24	7955	13
1366	14.86	15.72	87.4	IPI00615149.1	si:dkey-78l4.14 Protein QIL1	7955	10
1367	14.86	16.93	61.2	IPI00806920.2	zgc:136551 Uncharacterized protein	7955	20
1368	14.85	19.65	58.8	IPI00614732.5	capn2b Novel protein similar to vertebrate calpain 2	7955	13
1369	14.83	23.19	71.3	IPI00512852.5	hnrnpd Hnrnpd protein	7955	16
1370	14.79	15.49	75.2	IPI00616601.6	asmtl Uncharacterized protein	7955	15
1371	14.78	15.55	83.7	IPI01024126.1	fkbp4 FK506 binding protein 4	7955	14
1372	14.77	15.33	65.4	IPI00511029.2	pgls Uncharacterized protein	7955	10
1373	14.74	14.78	71.3	IPI00504209.1	chchd10 Uncharacterized protein	7955	8
1374	14.73	14.83	53.1	IPI00630061.3	tpp1 Uncharacterized protein	7955	15
1375	14.72	14.76	45.6	IPI00861743.4	npc1 Niemann-Pick disease type C1 protein	7955	14
1376	14.71	14.89	76.6	IPI00817875.1	snrnp70 Uncharacterized protein	7955	9
1377	14.71	14.87	63.3	IPI00845017.1	zgc:175088 Zgc:175088 protein	7955	12
1378	14.7	15.11	59.2	IPI01005964.1	LOC100329879 clathrin light chain B-like isoform 2	7955	10
1379	14.69	14.83	67.3	IPI00486312.1	akap8l A kinase (PRKA) anchor protein 8-like	7955	12
1380	14.69	15.56	65.8	IPI00923216.2	rpz2 Rapunzel2	7955	16
1381	14.67	14.87	60.9	IPI00502874.1	sf3a1 Uncharacterized protein	7955	13
1382	14.64	14.91	79.9	IPI00499753.1	zgc:136439 Novel protein similar to bacterial glucose-1-phosphate thymidylyltransferases	7955	13
1383	14.63	30.74	72	IPI00489849.3	cbsb Cystathionine beta-synthase	7955	27
1384	14.6	16.45	54.7	IPI00934358.2	zgc:158321 Enoyl-CoA hydratase domain-containing protein 3, mitochondrial	7955	10
1385	14.59	15.14	80.7	IPI00993504.1	ap2m1b Uncharacterized protein	7955	15
1386	14.58	15.41	58.7	IPI00493207.3	prkacbb;prkacb Uncharacterized protein	7955	8
1387	14.57	15.12	54	IPI00490061.1	zgc:63840 Zgc:63840	7955	21
1388	14.55	14.63	83.8	IPI00508445.1	arhgdig Uncharacterized protein	7955	12
1389	14.5	15.27	74.6	IPI00509665.6	ddx23 Uncharacterized protein	7955	11
1390	14.49	23.71	77.2	IPI00509076.6	si:dkeyp-68f9.12 sterol 26-hydroxylase, mitochondrial	7955	18
1391	14.48	14.51	47.3	IPI00490539.5	edc4 Enhancer of mRNA-decapping protein 4	7955	10
1392	14.47	14.79	81.2	IPI00882923.2	urah 5-hydroxyisourate hydrolase	7955	11
1393	14.46	14.63	79.5	IPI00769832.3	si:rp71-57j15.4 Uncharacterized protein	7955	10
1394	14.45	14.7	87.5	IPI00760298.2	zgc:136493 Uncharacterized protein	7955	16
1395	14.44	14.89	59.8	IPI00484412.8	esyt1b Uncharacterized protein	7955	19
1396	14.44	14.56	59.7	IPI00513077.2	lgals3l Lectin, galactoside-binding, soluble, 3 (Galectin 3)-like	7955	12
1397	14.44	15.47	61.9	IPI01006156.1	LOC795315 hypothetical protein LOC795315	7955	15
1398	14.42	17.04	62.2	IPI00972471.1	abcb4 Uncharacterized protein	7955	13
1399	14.41	16.24	63.8	IPI00900044.3	LOC563036 hypothetical protein LOC563036	7955	13
1400	14.39	15.84	46.1	IPI00488236.3	scpep1 Uncharacterized protein	7955	18
1401	14.38	15.41	73.2	IPI00832945.2	zgc:171553 Zgc:171553 protein	7955	12
1402	14.35	23.4	95.8	IPI00505955.1	zgc:101621 Zgc:101621 protein	7955	23
1403	14.34	14.58	50.9	IPI00502091.4	si:dkey-177p2.3 Uncharacterized protein	7955	18
1404	14.33	16.22	71.7	IPI00962304.1	ugt1a4 UDP glucuronosyltransferase 1 family polypeptide a4 short isoform	7955	17
1405	14.32	14.66	57.2	IPI00492212.3	LOC563777 Uncharacterized protein	7955	11
1406	14.32	16.7	52	IPI00510578.3	sccpdha Uncharacterized protein	7955	15
1407	14.31	14.4	63.2	IPI00511953.4	acin1b Uncharacterized protein	7955	13
1408	14.31	15.95	70.9	IPI01006308.1	LOC100537304 Uncharacterized protein	7955	11
1409	14.3	14.35	68.4	IPI00829178.1	zgc:158363 Zgc:158363	7955	12
1410	14.29	16.51	62.6	IPI00488935.2	LOC100536298 Methionine aminopeptidase	7955	12
1411	14.29	16.59	70.3	IPI00508186.1	zgc:91876 Zgc:91876	7955	11
1412	14.29	14.47	44.5	IPI00512268.3	sec61al1 Protein transport protein Sec61 subunit alpha-like 1	7955	11
1413	14.28	14.93	58.7	IPI00482801.2	sec11a Uncharacterized protein	7955	10
1414	14.28	14.75	59.3	IPI00633745.3	sfxn3 Zgc:158660	7955	10
1415	14.25	15.65	69	IPI00500365.5	rtn4ip1 Reticulon-4-interacting protein 1 homolog, mitochondrial	7955	11
1416	14.23	19.17	72.4	IPI00503916.1	rac1 Uncharacterized protein	7955	15
1417	14.22	14.46	63.9	IPI00992962.1	snrpa1 Uncharacterized protein	7955	9
1418	14.17	15.76	75.3	IPI00504220.5	zgc:110801 Serine/threonine-protein phosphatase	7955	15
1419	14.17	14.33	76.6	IPI00972468.1	napgl Uncharacterized protein	7955	9
1420	14.16	14.23	75	IPI00498381.1	fkbp1aa Zgc:73373	7955	18
1421	14.16	14.69	71	IPI00499049.1	rab5c Uncharacterized protein	7955	14
1422	14.16	14.35	50.9	IPI00961740.2	si:dkey-257n17.3 LOW QUALITY PROTEIN: si:dkey-257n17.3	7955	19
1423	14.14	14.55	73.4	IPI00496845.1	eif3ha Eukaryotic translation initiation factor 3 subunit H-A	7955	13
1424	14.13	14.2	68.9	IPI00484105.1	ralbb Zgc:86798	7955	9
1425	14.12	14.41	51.6	IPI00876706.2	atl2 Uncharacterized protein	7955	15
1426	14.11	14.13	81.6	IPI00481422.2	zff9 Cellular nucleic acid-binding protein	7955	10
1427	14.11	14.59	90	IPI00488986.1	zgc:77767 Barrier-to-autointegration factor	7955	14
1428	14.11	14.62	53.6	IPI00494482.5	si:ch211-196f5.1 Uncharacterized protein	7955	14
1429	14.1	26.11	75.9	IPI00508335.3	sult1st1 Cytosolic sulfotransferase 1	7955	27
1430	14.09	14.18	75.5	IPI00485460.2	si:ch211-258l4.7 Uncharacterized protein	7955	9
1431	14.09	14.62	54.7	IPI00487425.3	alp Alkaline phosphatase	7955	13
1432	14.08	15.95	83.9	IPI00774304.2	h1fx H1 histone family, member X	7955	11
1433	14.07	37.54	85.8	IPI00482319.2	ckma Muscle-specific creatine kinase	7955	31
1434	14.07	14.22	66.9	IPI00498104.2	atp6v0d1 V-ATPase AC39 subunit	7955	10
1435	14.07	14.37	56	IPI00500537.1	anp32e Acidic leucine-rich nuclear phosphoprotein 32 family member E	7955	13
1436	14.07	14.48	65.6	IPI00835206.1	zgc:123284 Zgc:123284	7955	10
1437	14.05	14.12	75.4	IPI00487558.1	pbp phosphatidylethanolamine binding protein	7955	12
1438	14.05	14.08	46.6	IPI00512056.1	zgc:55891 Zgc:55891	7955	12
1439	14.03	15.94	57.5	IPI00505038.2	gmppb Mannose-1-phosphate guanyltransferase beta	7955	9
1440	14.03	47.79	68.4	IPI00505088.3	ppp2r1b Protein phosphatase 2 (Formerly 2A), regulatory subunit A, beta isoform	7955	33
1441	14.01	15.13	90.4	IPI00486429.2	bag2 Uncharacterized protein	7955	10
1442	14.01	16.07	92.5	IPI00488276.1	ndufs5 Uncharacterized protein	7955	11
1443	14.01	17.12	75.4	IPI00502249.1	bzw1a Basic leucine zipper and W2 domain-containing protein 1-A	7955	13
1444	14	16.81	77.6	IPI00508932.3	fabp11a;LOC100536788 Uncharacterized protein	7955	17
1445	14	22.13	75.1	IPI00915641.1	dhrs11b Dehydrogenase/reductase (SDR family) member 11b	7955	25
1446	13.98	16.47	61.3	IPI00480927.4	lum Zgc:86661 (Fragment)	7955	9
1447	13.96	14.16	56.6	IPI00498609.2	zgc:92027 Zgc:92027	7955	11
1448	13.96	14.32	70.5	IPI00634824.3	zgc:153607 Calcium uniporter protein, mitochondrial	7955	10
1449	13.95	13.98	61.2	IPI00972266.1	atp13a Uncharacterized protein	7955	16
1450	13.94	13.97	52.5	IPI00482344.1	zgc:55741 Zgc:55741	7955	9
1451	13.94	14.15	60.2	IPI00866524.1	npm1 Uncharacterized protein	7955	17
1452	13.93	14.14	50.6	IPI00829145.1	zgc:158605 Zgc:158605	7955	11
1453	13.88	14.03	55.1	IPI00512310.5	hdac1 Histone deacetylase	7955	9
1454	13.86	14	76	IPI00618772.2	ctbp1 C-terminal binding protein 1	7955	9
1455	13.85	14.02	61.1	IPI00899658.2	LOC402804 LOC402804 protein (Fragment)	7955	10
1456	13.84	14.02	68.3	IPI00774368.2	stom Uncharacterized protein	7955	12
1457	13.83	15.66	72.9	IPI00487717.2	hmbsa Hydroxymethylbilane synthase a	7955	10
1458	13.82	14.16	58.5	IPI00496622.3	emilin1a Uncharacterized protein	7955	16
1459	13.82	38.43	82.5	IPI00509935.1	ywhabl Uncharacterized protein	7955	48
1460	13.81	14.01	69.4	IPI00492425.4	nipsnap1 Uncharacterized protein	7955	15
1461	13.81	21.56	51.6	IPI00846060.1	nap1l4a Nap1l4a protein	7955	14
1462	13.79	59.31	97	IPI00493031.2	zgc:110216 Uncharacterized protein	7955	58
1463	13.79	13.88	61.1	IPI00499451.1	cdc42bpb Uncharacterized protein	7955	21
1464	13.78	13.87	80.4	IPI00861444.3	- Uncharacterized protein	7955	11
1465	13.77	13.84	53.8	IPI00963480.2	pdpr Uncharacterized protein	7955	10
1466	13.76	14.36	60	IPI00505836.2	icn ictacalcin	7955	14
1467	13.75	13.9	75.6	IPI00503863.2	zgc:109973 Zgc:109973	7955	11
1468	13.74	14.26	94.7	IPI00492713.1	si:ch211-239j9.2 cytochrome c oxidase polypeptide VIc-like	7955	16
1469	13.73	13.8	78.6	IPI00509867.3	mcfd2 Multiple coagulation factor deficiency 2	7955	16
1470	13.7	13.82	57	IPI00490008.2	ampd3 Uncharacterized protein	7955	10
1471	13.7	13.78	67.8	IPI00551909.1	psmb3 Proteasome subunit beta type	7955	9
1472	13.68	13.91	66.8	IPI00488001.1	cops2 COP9 signalosome complex subunit 2	7955	11
1473	13.65	13.73	72.6	IPI00994294.1	adi1 Uncharacterized protein	7955	12
1474	13.64	15.36	68.4	IPI00877541.1	zgc:172244 Zgc:172244 protein	7955	13
1475	13.62	13.78	67.2	IPI00864730.2	zgc:172049 Zgc:172049 protein	7955	8
1476	13.61	14.51	65.5	IPI00498398.2	st13 Uncharacterized protein	7955	12
1477	13.59	13.86	51.3	IPI00511250.2	snx9l Sorting nexin 9-like	7955	9
1478	13.59	13.68	49.1	IPI00993177.2	psmb7 Proteasome subunit beta type	7955	9
1479	13.58	13.77	59.4	IPI00485719.3	si:ch211-205h19.1 Acyl-coenzyme A oxidase	7955	12
1480	13.51	13.68	80.2	IPI00492518.2	pacsin1b Uncharacterized protein	7955	9
1481	13.51	13.56	57.2	IPI00497366.1	ck2b Casein kinase II subunit beta	7955	9
1482	13.5	13.87	81.2	IPI00501499.1	smc1al Uncharacterized protein	7955	19
1483	13.5	15.08	68.8	IPI00509392.1	pdcd5 Uncharacterized protein	7955	8
1484	13.49	13.52	50.9	IPI00484241.1	clptm1 Cleft lip and palate transmembrane protein 1 homolog	7955	11
1485	13.49	33.1	65.6	IPI00817843.1	zgc:154169 Zgc:154169	7955	29
1486	13.46	14.12	53.8	IPI00506875.2	dfna5 Uncharacterized protein	7955	10
1487	13.46	13.51	63.9	IPI00962488.2	mpx Mpx protein	7955	11
1488	13.44	13.95	57.2	IPI00836574.1	LOC563048 LOC563048 protein (Fragment)	7955	9
1489	13.43	13.79	53.4	IPI00486663.4	LOC100002956 Uncharacterized protein	7955	11
1490	13.42	13.47	75.8	IPI00971630.1	ndufb5 Uncharacterized protein	7955	10
1491	13.38	13.68	69.3	IPI00920403.3	LOC572406 utrophin-like, partial	7955	9
1492	13.32	26.06	67.6	IPI00491704.3	mxc Interferon-induced GTP-binding protein MxC	7955	26
1493	13.32	13.54	44.4	IPI00492845.1	mt-co2 Cytochrome c oxidase subunit 2	7955	17
1494	13.32	20.47	61.5	IPI00865338.2	impdh2 Inosine-5'-monophosphate dehydrogenase	7955	18
1495	13.32	13.49	70.2	IPI00901808.2	LOC563642 l-serine dehydratase/L-threonine deaminase-like	7955	9
1496	13.3	16.12	62.6	IPI00483143.2	hm13 Uncharacterized protein	7955	12
1497	13.3	15.15	59.4	IPI00504463.1	slc25a10 Solute carrier family 25 (Mitochondrial carrier	7955	10
1498	13.3	13.33	56.7	IPI00513363.3	lmf2b lipase maturation factor 2	7955	18
1499	13.3	15.85	51.8	IPI00996526.1	LOC562946 Uncharacterized protein	7955	19
1500	13.29	13.84	58.8	IPI00507287.5	LOC560816 Uncharacterized protein	7955	9
1501	13.29	13.87	49.2	IPI00994307.1	ldlr Uncharacterized protein	7955	14
1502	13.28	13.4	92.2	IPI00497389.1	zgc:56576 UPF0568 protein C14orf166 homolog	7955	8
1503	13.27	14.27	96.6	IPI00507054.3	b2m Beta-2-microglobulin	7955	11
1504	13.26	13.32	67.5	IPI00491037.1	thoc1 THO complex 1	7955	8
1505	13.24	13.27	68	IPI00512750.1	zgc:56518 Zgc:56518	7955	10
1506	13.24	13.61	63.6	IPI00627179.3	srp72 Srp72 protein (Fragment)	7955	12
1507	13.23	13.7	58	IPI00512751.2	ctsk Cathepsin K	7955	16
1508	13.22	13.28	59.1	IPI00496133.4	mtx2 Uncharacterized protein	7955	8
1509	13.22	13.69	70.2	IPI00513179.1	zgc:85644 Prostamide/prostaglandin F synthase	7955	8
1510	13.2	16.88	72.3	IPI00786686.2	si:ch211-117n7.7 Si:ch211-117n7.7	7955	12
1511	13.18	13.5	58.7	IPI00492628.1	mapk3 Uncharacterized protein	7955	10
1512	13.17	13.21	79.3	IPI00498441.2	rpia Uncharacterized protein	7955	9
1513	13.17	13.32	62.5	IPI00961962.2	si:dkeyp-8h9.2 Wu:fc88b11 protein	7955	8
1514	13.16	13.25	64.6	IPI00505174.5	otub1 Uncharacterized protein	7955	12
1515	13.13	14.98	64.2	IPI00497126.4	fermt2 Uncharacterized protein	7955	12
1516	13.13	13.17	99	IPI00513660.1	zgc:92850 Zgc:92850	7955	10
1517	13.13	14.33	76	IPI00834021.2	LOC794786 Uncharacterized protein	7955	10
1518	13.13	13.52	57.3	IPI00933640.1	psmb5 Proteasome subunit beta type	7955	7
1519	13.12	13.61	66	IPI00570258.1	mrpl12 Uncharacterized protein	7955	9
1520	13.11	13.7	71.6	IPI00494396.1	zgc:92303 Zgc:92303	7955	11
1521	13.09	20.99	61	IPI00512269.3	ldha L-lactate dehydrogenase A chain	7955	19
1522	13.08	14.64	71.3	IPI00480910.4	spra Sepiapterin reductase	7955	11
1523	13.06	14.87	64.4	IPI00484204.1	cd81 Uncharacterized protein	7955	10
1524	13.05	13.79	69.1	IPI00497505.2	ndufs4 Uncharacterized protein	7955	10
1525	13.05	13.12	76.7	IPI00570084.2	zgc:110325 Uncharacterized protein	7955	8
1526	13.04	13.08	49.2	IPI00500663.4	ptplb Uncharacterized protein	7955	8
1527	13.04	13.14	52.6	IPI00836727.4	LOC561153 Uncharacterized protein	7955	8
1528	13.04	13.38	82.1	IPI00996913.1	- Uncharacterized protein	7955	12
1529	13.03	13.1	61.4	IPI00497637.1	pwp1 Uncharacterized protein	7955	9
1530	13.01	13.21	82.7	IPI00498908.2	zgc:110726 Eukaryotic translation initiation factor 3 subunit K	7955	9
1531	13.01	13.07	65.3	IPI00882984.1	zgc:174908 Zgc:174908 protein	7955	8
1532	12.99	13.06	80.8	IPI00509449.1	ndufb4 Uncharacterized protein	7955	8
1533	12.99	13.01	39.6	IPI00805083.5	sec24c Sec24 family member C	7955	12
1534	12.99	13.07	55.1	IPI00920387.1	naca Uncharacterized protein	7955	16
1535	12.98	27.83	88.6	IPI00555419.2	zgc:110343 Zgc:110343 protein	7955	33
1536	12.95	13.36	64.2	IPI00484376.2	pex5 Uncharacterized protein	7955	11
1537	12.94	13.01	59.4	IPI00800284.3	cpt1b Uncharacterized protein	7955	10
1538	12.93	15.34	66.2	IPI00503237.4	ptpn6 Protein tyrosine phosphatase, non-receptor type 6	7955	13
1539	12.93	13.04	55	IPI00911432.1	gyg2 Zgc:194962	7955	10
1540	12.9	13.22	60.3	IPI00483241.1	zgc:91926 Zgc:91926	7955	8
1541	12.9	12.96	67.8	IPI00994289.1	cbx3a Uncharacterized protein	7955	6
1542	12.89	13.21	63.8	IPI00484286.2	zgc:101858 Uncharacterized protein	7955	8
1543	12.89	14.83	66.4	IPI00495300.1	pcbp2 Uncharacterized protein	7955	11
1544	12.88	13.49	70	IPI00490984.2	dctn1a Dynactin 1a	7955	23
1545	12.88	13.31	73.1	IPI00506848.3	psmb4 Proteasome subunit beta type	7955	9
1546	12.87	15.2	62.6	IPI00500948.1	agps Alkylglycerone phosphate synthase	7955	10
1547	12.84	15.54	62.6	IPI00995527.1	scinla Scinderin like a	7955	15
1548	12.83	13.43	78.6	IPI00499039.3	tagln2 Transgelin	7955	13
1549	12.82	13.79	90.2	IPI00772264.2	zgc:171710 Zgc:171710 protein	7955	10
1550	12.81	12.88	74	IPI00607430.2	zgc:110655 Pyrroline-5-carboxylate reductase	7955	8
1551	12.81	14.01	49.8	IPI00998060.1	usp9 Ubiquitin carboxyl-terminal hydrolase	7955	18
1552	12.8	12.85	63.2	IPI00494808.5	nol6 nucleolar protein family 6	7955	13
1553	12.78	13.17	53.7	IPI00934316.2	- Uncharacterized protein	7955	8
1554	12.77	12.91	71.3	IPI00505312.1	zgc:110525 RNA-binding protein 8A	7955	12
1555	12.72	13.29	70.4	IPI00513127.3	l2hgdh Uncharacterized protein	7955	10
1556	12.71	12.89	69.4	IPI00489872.5	LOC570012 Uncharacterized protein	7955	12
1557	12.71	13.33	62.6	IPI00495792.2	hk2 Uncharacterized protein	7955	10
1558	12.71	14.87	88.4	IPI00505301.2	atp5l Uncharacterized protein	7955	15
1559	12.7	13.12	59.8	IPI00506803.1	erlec1;LOC100535374 Zgc:55819	7955	10
1560	12.7	13.72	67.5	IPI00914416.1	zgc:174904 Zgc:174904 protein	7955	7
1561	12.68	13.19	67.9	IPI00504792.3	- Uncharacterized protein	7955	12
1562	12.67	13.16	55.1	IPI00861322.2	aacs Isoform 2 of Acetoacetyl-CoA synthetase	7955	13
1563	12.67	20.36	82.2	IPI00866463.2	capza1a Uncharacterized protein	7955	20
1564	12.65	12.76	50.7	IPI00609594.1	si:ch211-234p6.12 Uncharacterized protein	7955	12
1565	12.64	14.12	66.3	IPI00759022.1	si:rp71-15k1.1 Si:rp71-15k1.1	7955	10
1566	12.63	13.21	70.9	IPI00902042.4	si:ch211-132g1.3 hypothetical protein LOC100004401	7955	10
1567	12.62	14.9	98.8	IPI00505199.1	zgc:66195 Zgc:66195	7955	16
1568	12.61	13.16	71.7	IPI00863550.2	sf3a3 Splicing factor 3a, subunit 3	7955	11
1569	12.6	14.89	57.5	IPI00504825.5	zgc:175288 Zgc:175288 protein	7955	12
1570	12.59	13.22	78.4	IPI00637941.1	pfn2l Profilin	7955	20
1571	12.59	12.6	34.3	IPI00854046.1	zgc:77778 Uncharacterized protein	7955	11
1572	12.57	12.91	71.7	IPI00860226.2	snx6 Uncharacterized protein	7955	8
1573	12.56	12.7	65.7	IPI00490440.5	kctd12.2 Uncharacterized protein	7955	7
1574	12.56	12.7	69.6	IPI00775081.3	eif4e3 Eukaryotic translation initiation factor 4E type 3	7955	8
1575	12.52	12.87	57.7	IPI00864428.2	si:ch211-129c21.6 Uncharacterized protein	7955	12
1576	12.51	29.75	60.4	IPI01023712.1	si:ch211-207o17.2 Uncharacterized protein	7955	31
1577	12.5	12.96	80.3	IPI00609714.4	vps4b Vps4b protein	7955	12
1578	12.5	12.68	54.6	IPI00833820.3	c8a Novel protein similar to vertebrate complement component 8, alpha polypeptide	7955	9
1579	12.49	12.63	78.7	IPI00506461.4	clybl citrate lyase beta-like	7955	9
1580	12.49	13.64	67.6	IPI00799550.4	im:7148292 Uncharacterized protein	7955	8
1581	12.49	13.61	66.7	IPI00934158.1	LOC100332733 Uncharacterized protein	7955	10
1582	12.48	12.91	83.3	IPI00486262.1	ccdc124 Coiled-coil domain-containing protein 124	7955	7
1583	12.46	18.93	67.4	IPI00495575.2	dia1 Diaphorase	7955	12
1584	12.45	25.12	66.9	IPI00481549.2	ppm1ba Uncharacterized protein	7955	19
1585	12.45	14.12	55.7	IPI00996594.1	cratb carnitine O-acetyltransferase b	7955	10
1586	12.43	13.9	70.6	IPI00482978.1	zgc:77816 Deoxyribonuclease	7955	10
1587	12.43	12.72	60.8	IPI00501030.1	cxadr Coxsackievirus and adenovirus receptor homolog	7955	10
1588	12.41	30.37	83.9	IPI00501310.2	pgam2 Phosphoglycerate mutase	7955	35
1589	12.41	14.63	67.3	IPI00507398.4	me2;LOC100537927 NAD-dependent malic enzyme, mitochondrial	7955	9
1590	12.39	60.14	70.3	IPI00615437.5	c3c Complement component C3-2	7955	70
1591	12.38	12.51	49.3	IPI00817174.1	tomm40 Uncharacterized protein	7955	9
1592	12.38	14.83	65.9	IPI00998382.1	cul2 Uncharacterized protein	7955	12
1593	12.36	16.32	66.8	IPI00494960.1	khdrbs1b Zgc:85948	7955	12
1594	12.36	12.5	57.7	IPI00507669.3	nt5c1bb Uncharacterized protein	7955	7
1595	12.36	12.88	71	IPI00933907.2	- Uncharacterized protein	7955	8
1596	12.35	13.7	63.2	IPI00488000.1	map2k2a Uncharacterized protein	7955	12
1597	12.35	12.78	61.2	IPI00503230.4	zgc:110116 Zgc:110116	7955	8
1598	12.34	15.15	67.9	IPI00492150.3	gnai2l Uncharacterized protein	7955	18
1599	12.34	12.36	70	IPI00501181.5	pds5b Uncharacterized protein	7955	17
1600	12.32	12.44	57.1	IPI00493288.4	si:ch211-197g15.7 si:ch211-197g15.7	7955	9
1601	12.32	13.18	84.5	IPI00495780.1	atp6v1e1 Uncharacterized protein	7955	14
1602	12.32	14.96	65.2	IPI00962484.1	ugt5d1 UDP glucuronosyltransferase 5 family polypeptide d1	7955	12
1603	12.3	12.54	56.4	IPI00786743.3	coq6 Zgc:153379	7955	9
1604	12.3	12.4	69.1	IPI00998757.1	ighm Uncharacterized protein	7955	7
1605	12.29	12.36	52.3	IPI00499714.5	dysf dysferlin	7955	18
1606	12.29	12.39	64.8	IPI00934254.2	adhfe1 Uncharacterized protein	7955	11
1607	12.28	12.82	68.3	IPI00495802.3	psmd4b Uncharacterized protein	7955	13
1608	12.28	14.78	58.1	IPI00496484.3	sae1 SUMO-activating enzyme subunit 1	7955	10
1609	12.28	12.35	47.1	IPI00998471.1	zgc:165649 Uncharacterized protein	7955	14
1610	12.27	12.48	73	IPI00993491.1	apex1 Uncharacterized protein	7955	9
1611	12.26	13.98	72.4	IPI00494409.4	prosc Uncharacterized protein	7955	8
1612	12.26	12.45	82.1	IPI00864739.2	zgc:153372 Zgc:153372	7955	7
1613	12.25	15.87	53.9	IPI00511944.6	apg3l Ubiquitin-like-conjugating enzyme ATG3	7955	13
1614	12.25	15.22	61.2	IPI00635332.4	zgc:153148 enolase superfamily 1	7955	12
1615	12.24	61.9	93.3	IPI00506105.1	tpm2 Zgc:86810	7955	39
1616	12.23	12.31	70.1	IPI00494976.3	paics Uncharacterized protein	7955	10
1617	12.21	12.62	62.6	IPI00500539.4	iars2 Uncharacterized protein	7955	22
1618	12.2	21.16	72.6	IPI00902357.3	LOC555374 microfibril-associated glycoprotein 4-like	7955	34
1619	12.18	13.1	57.1	IPI00963155.2	LOC795505 Uncharacterized protein	7955	12
1620	12.17	12.25	52.1	IPI00501566.2	acsl4a Acyl-CoA synthetase long-chain family member 4a	7955	9
1621	12.16	38.41	74.4	IPI00490850.1	aldocb Fructose-bisphosphate aldolase C-B	7955	63
1622	12.15	25.85	62	IPI00618958.2	LOC566996 Uncharacterized protein	7955	19
1623	12.14	12.22	54.8	IPI00619132.1	LOC566752 Uncharacterized protein	7955	8
1624	12.13	12.18	51.8	IPI00512496.6	LOC100004299 Uncharacterized protein	7955	12
1625	12.1	14.21	54.3	IPI00496392.4	cpa1 Carboxypeptidase A1	7955	9
1626	12.09	14.24	84.9	IPI00485703.1	pitpna Uncharacterized protein	7955	7
1627	12.09	12.1	63	IPI00612557.3	wu:fb66f03 lysosome-associated membrane glycoprotein 1 isoform 1	7955	14
1628	12.09	12.16	61.4	IPI00834509.5	LOC571089 Uncharacterized protein	7955	14
1629	12.09	13.27	70.6	IPI00928879.1	snx12 sorting nexin 12 isoform 2	7955	10
1630	12.08	12.78	80.7	IPI00494268.2	zgc:73311 UPF0765 protein C10orf58 homolog	7955	10
1631	12.08	12.64	71.7	IPI00919897.1	tnni2b.2 Uncharacterized protein	7955	6
1632	12.06	12.25	68.2	IPI00496746.2	si:dkey-90m5.4 Uncharacterized protein	7955	10
1633	12.05	12.14	59.2	IPI00496442.4	impa1 Uncharacterized protein	7955	6
1634	12.05	12.24	53.1	IPI00837429.3	coasy Zgc:92337	7955	6
1635	12.04	12.82	58.4	IPI00482712.1	ppp6c Serine/threonine-protein phosphatase	7955	7
1636	12.04	12.22	52.7	IPI00504681.2	supt6h Transcription elongation factor SPT6	7955	12
1637	12.04	19.18	48.9	IPI00806660.2	LOC100332635 Uncharacterized protein	7955	15
1638	12.03	12.06	68.8	IPI00804738.2	slc25a21 Solute carrier family 25 (Mitochondrial oxodicarboxylate carrier), member 21	7955	9
1639	12.03	12.11	49.9	IPI00995565.1	zgc:77123 Zgc:77123 (Fragment)	7955	6
1640	12.02	12.41	58.2	IPI00619002.3	ciapin1 Anamorsin	7955	7
1641	12.01	16.23	58.1	IPI00483436.2	ndufs8 Uncharacterized protein	7955	14
1642	12.01	14.24	51.5	IPI00607246.3	ogt.1 Uncharacterized protein	7955	16
1643	12	25.83	82.8	IPI00510770.1	zgc:77650 Zgc:77650	7955	25
1644	12	12.14	88.7	IPI00782820.1	mif Uncharacterized protein	7955	9
1645	12	12.16	71.1	IPI00994808.1	LOC100006139 Uncharacterized protein	7955	10
1646	11.98	12.36	66.6	IPI00492099.5	ddx18 DEAD (Asp-Glu-Ala-Asp) box polypeptide 18	7955	10
1647	11.98	12.09	72.8	IPI00499792.1	apoa1bp Apolipoprotein A-I-binding protein	7955	7
1648	11.97	12.1	50.5	IPI00489275.4	zgc:63986 Uncharacterized protein	7955	8
1649	11.96	16.62	85.7	IPI00607460.2	zgc:112210 Uncharacterized protein	7955	12
1650	11.92	12.01	70.2	IPI00972130.1	mhc2dab MHC class II DA-beta-3*01 (Fragment)	7955	6
1651	11.91	12.5	62.4	IPI00486346.3	nmt1a Glycylpeptide N-tetradecanoyltransferase	7955	10
1652	11.9	13.27	62.1	IPI00501747.2	sri Uncharacterized protein	7955	15
1653	11.89	11.89	83.5	IPI00502633.1	zgc:64130 Zgc:64130	7955	11
1654	11.88	13.25	68.8	IPI00934965.4	chchd3 Uncharacterized protein	7955	9
1655	11.86	12.52	54.5	IPI00997253.1	mllt4 Uncharacterized protein	7955	11
1656	11.81	11.88	68.2	IPI00509474.2	tsta3 Uncharacterized protein	7955	10
1657	11.81	14.11	63.1	IPI00770939.3	coro1a Uncharacterized protein	7955	11
1658	11.81	13.97	52.5	IPI00993958.1	ubin Ubin protein	7955	12
1659	11.8	13.32	68.5	IPI00497581.3	sept10 Uncharacterized protein	7955	10
1660	11.8	13.89	42.4	IPI00505751.4	fuca2 Zgc:92013	7955	8
1661	11.78	11.78	73.2	IPI00504894.1	cyb5b Uncharacterized protein	7955	9
1662	11.78	11.82	52.5	IPI00611987.4	LOC559134 Uncharacterized protein	7955	11
1663	11.77	12.04	63.9	IPI00492936.7	narfl cytosolic Fe-S cluster assembly factor narfl	7955	9
1664	11.77	11.82	62.3	IPI00803594.4	dis3 Uncharacterized protein	7955	8
1665	11.77	11.86	81.5	IPI00931145.2	si:dkey-222e15.2 Uncharacterized protein	7955	8
1666	11.76	12.47	58.4	IPI00864600.3	cyfip1 Cytoplasmic FMR1-interacting protein 1 homolog	7955	16
1667	11.75	12.34	75.6	IPI00901896.3	LOC795797 NAD(P)(+)--arginine ADP-ribosyltransferase 2-like	7955	9
1668	11.74	16.78	90.4	IPI00494894.2	cox4i2 Zgc:73355	7955	21
1669	11.72	11.99	95.2	IPI00495374.3	rps15 Ribosomal protein S15	7955	15
1670	11.72	11.83	71.4	IPI00897265.1	tceb2 transcription elongation factor B, polypeptide 2	7955	8
1671	11.71	11.82	41.2	IPI00481491.2	tnpo2 Uncharacterized protein	7955	15
1672	11.71	12.69	84.1	IPI00485767.1	lin7c Uncharacterized protein	7955	11
1673	11.69	11.79	62.3	IPI00491308.3	ddc Uncharacterized protein	7955	9
1674	11.69	12.14	48.6	IPI00503967.2	zgc:110800 Zgc:110800	7955	8
1675	11.69	14.82	87	IPI00639531.2	anxa2b Uncharacterized protein	7955	11
1676	11.67	11.86	74	IPI00487948.2	crk V-crk sarcoma virus CT10 oncogene homolog	7955	10
1677	11.67	11.85	56	IPI00800129.3	LOC570106 Uncharacterized protein	7955	11
1678	11.66	12.06	50.5	IPI00495834.3	sec23ip Uncharacterized protein	7955	14
1679	11.66	12.09	54	IPI00960221.2	LOC100332077 butyrophilin subfamily 1 member A1-like	7955	9
1680	11.64	11.68	90.6	IPI00489005.3	brp44 Uncharacterized protein	7955	13
1681	11.62	32.47	97.1	IPI00506528.2	cox5ab cytochrome c oxidase subunit 5A, mitochondrial isoform 2	7955	38
1682	11.61	11.73	92.7	IPI00508277.1	rpl35a Uncharacterized protein	7955	6
1683	11.6	11.94	66.4	IPI00495138.1	oxsr1b Uncharacterized protein	7955	8
1684	11.58	11.87	86.3	IPI00484810.3	rpl34 60S ribosomal protein L34	7955	7
1685	11.58	15.37	79.1	IPI00502053.2	zgc:63637 Zgc:63637 protein	7955	14
1686	11.57	12.26	79.9	IPI00492203.2	zgc:101761 Zgc:101761	7955	10
1687	11.57	11.83	68.5	IPI00508333.1	ca2 Carbonic anhydrase II	7955	16
1688	11.57	12.39	75.5	IPI00758704.3	cmas Cytidine monophosphate N-acetylneuraminic acid synthetase	7955	11
1689	11.57	11.62	53.6	IPI00805827.3	mogs Zgc:158312	7955	14
1690	11.56	11.65	55.7	IPI00484317.1	asna1 ATPase asna1	7955	8
1691	11.54	11.59	52.1	IPI00498075.4	acss3 Uncharacterized protein	7955	9
1692	11.53	15.01	48.7	IPI00770029.3	LOC556199 phosphorylase b kinase regulatory subunit alpha, liver isoform-like	7955	12
1693	11.52	14.17	59.5	IPI00490380.1	stat5.2 Stat5.2	7955	16
1694	11.52	15.9	57.8	IPI00499024.2	ahcyl2 Adenosylhomocysteinase	7955	10
1695	11.52	14.02	69.9	IPI00992952.1	gnas Uncharacterized protein	7955	12
1696	11.51	11.66	54.6	IPI00516086.4	glyr1 Putative oxidoreductase GLYR1	7955	11
1697	11.51	12.52	64	IPI00619512.4	mtif2 Translation initiation factor IF-2	7955	10
1698	11.5	11.64	86.1	IPI00512743.3	LOC568800 ras-related protein Rab-31-like	7955	7
1699	11.5	11.58	62.6	IPI00770668.2	adssl Adenylosuccinate synthetase	7955	8
1700	11.49	11.59	63.9	IPI00898286.1	zgc:110259 Zgc:110259	7955	7
1701	11.48	19.33	66.6	IPI00505525.1	zgc:56235 Zgc:56235	7955	18
1702	11.47	13.65	79.4	IPI00491519.4	zgc:123327 Uncharacterized protein	7955	11
1703	11.46	29.49	99.2	IPI00500460.1	ywhah tyrosine 3-monooxygenase/tryptophan 5-monooxygenase activation protein, gamma polypeptide	7955	33
1704	11.46	11.75	66.3	IPI00513285.2	rbm25 Uncharacterized protein	7955	8
1705	11.46	11.81	76.7	IPI00882710.1	snw1 Zgc:123090 protein	7955	8
1706	11.45	11.58	52.9	IPI00933055.1	prep Zgc:110670	7955	10
1707	11.42	11.49	79.4	IPI00860024.2	top1l topoisomerase (DNA) I, like	7955	11
1708	11.4	11.46	83.2	IPI00490709.1	eif1b eukaryotic translation initiation factor 1B	7955	12
1709	11.4	26.82	55	IPI00491316.5	acacb acetyl-CoA carboxylase 2	7955	24
1710	11.4	11.6	63.1	IPI00633373.4	ccbl2 Kynurenine--oxoglutarate transaminase 3	7955	9
1711	11.4	36.54	62.3	IPI00656473.2	ugt1a1 UDP glycosyltransferase 1 family, polypeptide A1 precursor	7955	33
1712	11.39	11.43	59.4	IPI00509562.4	uhrf1bp1l Uncharacterized protein	7955	19
1713	11.39	11.64	62.2	IPI00630775.1	LOC573028 Novel protein	7955	10
1714	11.39	13.51	49.7	IPI00770962.4	zgc:152900 dipeptidyl peptidase 9	7955	9
1715	11.36	13.69	63.4	IPI00482879.2	nae1 Isoform 1 of NEDD8-activating enzyme E1 regulatory subunit	7955	10
1716	11.35	11.85	59.7	IPI00505355.2	rer1 Uncharacterized protein	7955	7
1717	11.35	11.55	66.5	IPI00961534.2	npm4 Uncharacterized protein	7955	10
1718	11.34	11.37	74.5	IPI00484606.1	npc2 Epididymal secretory protein E1	7955	6
1719	11.33	11.69	53.4	IPI00628487.4	lrrc15 Leucine rich repeat containing 15	7955	7
1720	11.32	12.45	71.6	IPI00485338.2	drg1 Developmentally regulated GTP-binding protein 1	7955	7
1721	11.32	15.54	55.1	IPI00635988.2	pmpcb Uncharacterized protein	7955	11
1722	11.32	11.67	74.4	IPI00919809.1	si:ch211-170d8.5 Uncharacterized protein	7955	9
1723	11.31	13.39	55	IPI00489317.4	LOC568482 Uncharacterized protein	7955	13
1724	11.31	11.32	57.8	IPI00900582.3	si:dkey-202m9.3 collagen alpha-6(VI) chain	7955	12
1725	11.3	17.11	92.4	IPI00490384.2	cirbp;eef1da Cold inducible RNA binding protein	7955	26
1726	11.29	11.81	78.5	IPI00607375.1	zgc:110680 Zgc:110680	7955	11
1727	11.28	25.09	97.9	IPI00499941.1	zgc:77231 Zgc:77231	7955	24
1728	11.28	11.62	56.4	IPI00897807.4	slc2a9l2 solute carrier family 2, facilitated glucose transporter member 9	7955	9
1729	11.27	17.58	81.3	IPI00488381.1	zgc:77702 Zgc:77702	7955	14
1730	11.26	11.33	66.4	IPI00482339.1	cisd1;si:dkey-18n13.4 Zgc:63561	7955	13
1731	11.26	11.54	69.5	IPI00501764.1	zgc:63976 Zgc:63976	7955	6
1732	11.26	11.69	71.8	IPI00855586.1	LOC100333434 Uncharacterized protein	7955	13
1733	11.25	14.27	75	IPI00485717.4	zgc:136953 Uncharacterized protein	7955	9
1734	11.25	12.63	62.9	IPI00501545.5	man1a1 Uncharacterized protein	7955	16
1735	11.23	11.25	93	IPI00831952.1	zgc:56530 Uncharacterized protein	7955	10
1736	11.22	11.33	46.3	IPI00489943.2	capn1a Calpain 1, (Mu/I) large subunit a	7955	12
1737	11.22	11.3	54.1	IPI00786719.2	dhrs7 Uncharacterized protein	7955	8
1738	11.22	11.32	62.1	IPI01023858.1	zgc:152945 Uncharacterized protein	7955	10
1739	11.2	11.36	97.5	IPI00500836.2	si:dkey-51e6.1 Uncharacterized protein	7955	11
1740	11.19	11.47	70.3	IPI01016958.1	hsd17b8 Uncharacterized protein	7955	8
1741	11.17	11.31	70	IPI00482142.1	atp6v1c1a V-type proton ATPase subunit C 1-A	7955	7
1742	11.16	11.84	85.7	IPI00500680.1	rpl38 Uncharacterized protein	7955	7
1743	11.16	11.4	92.7	IPI00505413.2	sub1 Uncharacterized protein	7955	10
1744	11.14	12.72	84.3	IPI00508000.1	dynll1 Uncharacterized protein	7955	10
1745	11.14	12.67	71	IPI00931837.1	nudt5 Uncharacterized protein	7955	7
1746	11.12	11.15	73.6	IPI00512841.1	vps29 Vacuolar protein sorting-associated protein 29	7955	7
1747	11.11	11.45	62.1	IPI00786723.1	zgc:153172 Zgc:153172	7955	8
1748	11.1	11.51	66.5	IPI00482935.1	synj2bp Zgc:56207	7955	6
1749	11.1	11.14	99	IPI00919624.1	hmga1 Uncharacterized protein	7955	5
1750	11.09	11.12	69	IPI00496040.5	zgc:112962 Uncharacterized protein	7955	9
1751	11.07	11.2	99.2	IPI00484560.1	ndufb6 Zgc:73375	7955	8
1752	11.07	11.22	67.4	IPI00502357.8	kif5ba kinesin-1 heavy chain	7955	12
1753	11.07	11.09	66.8	IPI01006411.1	LOC100538272 Uncharacterized protein	7955	8
1754	11.04	11.14	63.5	IPI00489485.1	exoc4 Uncharacterized protein	7955	8
1755	11.04	11.42	55.1	IPI01023593.1	LOC571044 Uncharacterized protein	7955	6
1756	11.01	11.26	71.3	IPI00484953.2	api5 apoptosis inhibitor 5	7955	8
1757	11.01	11.45	39.3	IPI00997562.1	sec31b Uncharacterized protein	7955	11
1758	11	11.04	55.2	IPI00501657.2	wdr12 Ribosome biogenesis protein wdr12	7955	6
1759	10.97	11.69	56.3	IPI00505379.2	stat1a Transcription factor	7955	14
1760	10.97	12.15	72.5	IPI00994095.1	LOC100535144 Uncharacterized protein	7955	8
1761	10.96	11.67	53.9	IPI00507733.1	gc Zgc:92753	7955	8
1762	10.95	13.18	50.9	IPI00487038.4	wu:fi14a03 Uncharacterized protein	7955	11
1763	10.94	10.96	59.3	IPI00861759.4	zgc:63611 Zgc:63611 protein	7955	12
1764	10.9	11.57	62.6	IPI00570094.1	cops6 COP9 constitutive photomorphogenic homolog subunit 6	7955	7
1765	10.9	10.94	57.4	IPI00835139.2	ppox Uncharacterized protein	7955	6
1766	10.9	11.86	59.7	IPI00866676.3	fech Ferrochelatase	7955	10
1767	10.89	11.03	65.4	IPI00499950.1	zgc:92445 2-methoxy-6-polyprenyl-1,4-benzoquinol methylase, mitochondrial	7955	8
1768	10.88	13.55	29.7	IPI00614542.2	asph Uncharacterized protein	7955	10
1769	10.87	10.87	73.8	IPI00614363.1	zgc:109888 40S ribosomal protein S27-like	7955	11
1770	10.87	15.28	58.1	IPI00851540.1	clta Uncharacterized protein	7955	11
1771	10.87	11.38	87.4	IPI01024648.1	eif3ja Uncharacterized protein	7955	6
1772	10.86	10.89	50.2	IPI00992973.2	LOC100332245 Uncharacterized protein	7955	9
1773	10.84	11.17	81.9	IPI00500325.1	rpl36 60S ribosomal protein L36	7955	10
1774	10.83	11.42	66.3	IPI00481671.2	tbcb Tubulin folding cofactor B	7955	6
1775	10.82	10.9	59.3	IPI00491334.1	galk1 Galactokinase 1	7955	6
1776	10.82	12.95	60.7	IPI00570325.2	zgc:110304 Zgc:110304	7955	6
1777	10.8	10.81	52.1	IPI00495807.5	si:dkey-286j20.1 si:dkey-286j20.1	7955	11
1778	10.78	11.47	44	IPI00491198.3	kpna4 Karyopherin alpha 4	7955	9
1779	10.78	10.95	65.9	IPI00505889.1	smu1 WD40 repeat-containing protein SMU1	7955	8
1780	10.78	10.8	81.8	IPI00555442.1	zgc:110155 NADH dehydrogenase [ubiquinone] 1 subunit C2	7955	6
1781	10.77	10.96	69.2	IPI00483633.6	LOC558893 Uncharacterized protein	7955	8
1782	10.77	25.24	87.4	IPI00503915.1	zgc:92061 Zgc:92061	7955	25
1783	10.76	12.13	89.4	IPI00498988.2	glo1 Uncharacterized protein	7955	12
1784	10.76	15.65	69	IPI00866392.3	ppa2 Uncharacterized protein	7955	19
1785	10.74	56.17	68.1	IPI00490134.2	atp1a1a.4 Uncharacterized protein	7955	55
1786	10.73	21.26	75.2	IPI00485904.1	gcdhl Glutaryl-Coenzyme A dehydrogenase, like	7955	31
1787	10.73	10.87	61.5	IPI00492966.2	dao.2 Uncharacterized protein	7955	6
1788	10.72	12.45	79.6	IPI00835140.1	mrps34 mitochondrial ribosomal protein S34	7955	7
1789	10.71	13.9	70.1	IPI00512491.2	drg2 Uncharacterized protein	7955	10
1790	10.7	11.4	80.7	IPI00481614.3	arpc5b Actin-related protein 2/3 complex subunit 5	7955	10
1791	10.69	10.88	58	IPI00483634.2	zgc:112384 Zgc:112384	7955	7
1792	10.68	10.8	74.9	IPI00481256.1	zgc:91802 Zgc:91802	7955	7
1793	10.68	10.87	47.2	IPI00503575.4	st3gal3l Uncharacterized protein	7955	7
1794	10.65	10.71	43.3	IPI00483899.4	htt Huntingtin	7955	12
1795	10.64	12.87	73.3	IPI00613203.2	snx4 Uncharacterized protein	7955	9
1796	10.63	11.36	80.3	IPI00492290.1	zgc:85752 Leucine-rich repeat-containing protein 59	7955	8
1797	10.63	10.91	55	IPI00510170.1	xpnpep1 X-prolyl aminopeptidase (Aminopeptidase P) 1, soluble	7955	11
1798	10.62	11.16	76.4	IPI00551848.2	LOC402883 ATP synthase subunit f, mitochondrial isoform 1	7955	14
1799	10.61	10.77	67.7	IPI00491398.2	zgc:56148 Uncharacterized protein	7955	8
1800	10.61	11.04	50.3	IPI00504654.3	tm9sf2 Transmembrane 9 superfamily member 2	7955	10
1801	10.61	10.61	30.4	IPI00617370.5	- Uncharacterized protein	7955	6
1802	10.61	10.96	76.6	IPI00901838.2	LOC566817 Uncharacterized protein	7955	6
1803	10.59	11.2	65.6	IPI00509285.1	LOC100534894;reep5 Uncharacterized protein	7955	7
1804	10.55	10.68	62.9	IPI00829142.1	zgc:158252 Zgc:158252	7955	6
1805	10.54	10.55	48.4	IPI00898395.3	mgam Uncharacterized protein	7955	10
1806	10.54	11.18	65.2	IPI00993084.1	zgc:92040 Zgc:92040	7955	11
1807	10.54	10.57	54.3	IPI01016720.1	- LOC563316 protein (Fragment)	7955	9
1808	10.53	10.62	47.4	IPI00636244.3	abcg2a Uncharacterized protein	7955	9
1809	10.51	10.69	54.9	IPI00829204.4	cnot1 Uncharacterized protein	7955	22
1810	10.5	10.63	65.9	IPI00481806.5	rps6ka3a Uncharacterized protein	7955	10
1811	10.5	10.59	58.1	IPI00996965.1	LOC568697 hypothetical protein LOC568697	7955	13
1812	10.49	20.35	65.4	IPI00896916.1	LOC556764 Uncharacterized protein	7955	17
1813	10.49	10.63	63	IPI00931896.1	LOC100333875 Uncharacterized protein	7955	12
1814	10.48	10.57	76.1	IPI00882593.1	si:dkey-190g11.7 Uncharacterized protein	7955	9
1815	10.47	11.09	65.1	IPI00481753.3	skiv2l2 Superkiller viralicidic activity 2-like 2	7955	12
1816	10.46	18.83	58.8	IPI00484680.7	a2ml1 alpha-2-macroglobulin-like protein 1-like	7955	25
1817	10.46	10.5	57.8	IPI00817133.1	epn1 Uncharacterized protein	7955	7
1818	10.46	10.62	65.9	IPI00960731.3	cdc5l Uncharacterized protein	7955	8
1819	10.44	10.54	48.9	IPI00994147.1	zgc:172056 Zgc:172056 protein	7955	9
1820	10.43	10.8	83.5	IPI00495793.1	htatip2 Uncharacterized protein	7955	6
1821	10.43	10.46	38.4	IPI00972344.1	akap1b Akap1b protein	7955	6
1822	10.42	10.43	84.6	IPI00498177.1	txndc17 Thioredoxin domain-containing protein 17	7955	5
1823	10.38	10.54	54.2	IPI00487684.5	lman2lb Lectin, mannose-binding 2-like b	7955	8
1824	10.38	10.45	72.1	IPI00934384.2	si:dkey-204a24.2 Cingulin	7955	8
1825	10.37	10.65	55.4	IPI00500543.2	mapre1 Uncharacterized protein	7955	7
1826	10.36	12.72	80.5	IPI00490968.1	clic1 Chloride intracellular channel 1	7955	8
1827	10.36	10.42	58.5	IPI00500739.3	kif13ba kinesin family member 13Ba	7955	11
1828	10.36	11.16	55.6	IPI00509921.3	si:ch211-210c8.6 hypothetical protein LOC564023	7955	8
1829	10.35	10.51	51.5	IPI01004565.1	wu:fj81e10 lysosome membrane protein 2	7955	5
1830	10.34	11.19	77.7	IPI00503077.1	si:ch211-11m18.2 Sel1 repeat-containing protein 1	7955	8
1831	10.34	10.58	81.9	IPI00508748.4	cacybp Calcyclin binding protein	7955	7
1832	10.34	10.47	66.9	IPI00834697.2	LOC100334525;dlg3 Uncharacterized protein	7955	8
1833	10.33	10.38	51.4	IPI00512968.1	ap1g1 Adaptor-related protein complex 1, gamma 1 subunit	7955	11
1834	10.32	10.41	55.1	IPI00494035.10	LOC100333227 carnitine O-palmitoyltransferase 1, liver isoform-like	7955	10
1835	10.32	10.54	63.4	IPI00803761.1	abhd6a Uncharacterized protein	7955	8
1836	10.3	10.36	99.2	IPI00500408.1	phpt1 Uncharacterized protein	7955	6
1837	10.3	10.3	78.9	IPI00505072.2	zgc:92707 hypothetical protein LOC436671	7955	6
1838	10.28	10.4	69.6	IPI00488801.2	zgc:92470 Calcium-binding mitochondrial carrier protein SCaMC-1	7955	9
1839	10.28	10.45	78.1	IPI01004988.1	sec22bb Vesicle-trafficking protein SEC22b-B	7955	7
1840	10.26	10.4	52.1	IPI00859381.1	cpped1 Calcineurin-like phosphoesterase domain-containing protein 1	7955	6
1841	10.25	11.64	67.7	IPI00901629.1	comtd1 catechol-O-methyltransferase domain containing 1	7955	8
1842	10.24	10.39	54.8	IPI00610892.5	itga3a Uncharacterized protein	7955	13
1843	10.23	10.9	70.9	IPI00613970.5	aarsd1 Alanyl-tRNA editing protein Aarsd1	7955	9
1844	10.23	10.39	46.2	IPI00963019.1	si:ch211-286m4.4 exportin-T	7955	7
1845	10.22	10.61	89.5	IPI00501058.3	prdx5 Uncharacterized protein	7955	14
1846	10.22	10.38	79.9	IPI00510716.1	pin1 Protein (Peptidyl-prolyl cis/trans isomerase) NIMA-interacting 1	7955	8
1847	10.21	10.43	61.7	IPI00920508.1	pmpca Uncharacterized protein	7955	7
1848	10.19	10.46	81.9	IPI00496021.2	zgc:123170 Zgc:123170	7955	7
1849	10.19	12.01	60.7	IPI00497012.2	cyp2j27 Cyp2j27 protein (Fragment)	7955	9
1850	10.19	11.63	93.6	IPI00506367.1	dctn3 Uncharacterized protein	7955	9
1851	10.19	10.24	67.1	IPI00952525.2	hip1 Uncharacterized protein	7955	8
1852	10.18	10.39	81.8	IPI00770982.2	zgc:158803 Zgc:158803 protein	7955	5
1853	10.16	11	58	IPI00485643.2	ilk Uncharacterized protein	7955	8
1854	10.16	10.27	81.5	IPI00504889.1	tbca Uncharacterized protein	7955	5
1855	10.15	12.4	61.9	IPI00482907.4	erlin2 Erlin-2	7955	7
1856	10.15	10.17	54.4	IPI00495103.4	tardbp Uncharacterized protein	7955	6
1857	10.15	10.24	53.7	IPI00502681.3	im:6903726 prostaglandin reductase 2	7955	6
1858	10.14	11.17	92.4	IPI00490879.1	ube2v2 Ubiquitin-conjugating enzyme E2 variant 2	7955	11
1859	10.14	15.85	75.9	IPI00860342.4	wu:fc66f06 Uncharacterized protein	7955	12
1860	10.13	10.17	54.4	IPI00650759.1	si:dkey-29p10.4 Uncharacterized protein	7955	5
1861	10.12	10.21	69.5	IPI00497767.1	zgc:77262 Zgc:77262	7955	6
1862	10.12	10.29	68.2	IPI01005261.1	LOC562053 hypothetical protein LOC562053	7955	6
1863	10.11	10.42	76.9	IPI00486377.2	prkab1b Uncharacterized protein	7955	5
1864	10.11	10.77	91.8	IPI00498940.2	tomm34 mitochondrial import receptor subunit TOM34	7955	7
1865	10.11	10.47	57.1	IPI00509697.2	eif6 Eukaryotic translation initiation factor 6	7955	10
1866	10.11	10.11	83.1	IPI00555351.1	zgc:103738 cysteine-rich protein 1	7955	6
1867	10.1	10.11	34.5	IPI00627325.6	LOC100330961 fibrillin-1-like	7955	8
1868	10.1	10.14	55.5	IPI01016827.1	bccip protein BCCIP homolog	7955	5
1869	10.09	10.57	47.2	IPI00961050.1	rap1gds1 rap1 GTPase-GDP dissociation stimulator 1-like, partial	7955	6
1870	10.08	12.69	49.2	IPI00492872.4	ptpn1 Protein tyrosine phosphatase 1b	7955	8
1871	10.08	10.18	69.9	IPI00931862.2	LOC100332843 5-formyltetrahydrofolate cyclo-ligase-like	7955	7
1872	10.07	10.1	77.9	IPI00491204.3	srsf11 Splicing factor, arginine/serine-rich 11	7955	6
1873	10.07	11.35	94.3	IPI00502943.1	pfdn1 Prefoldin subunit 1	7955	9
1874	10.07	10.52	45.7	IPI00993831.1	psme4b proteasome (prosome, macropain) activator subunit 4b	7955	11
1875	10.06	10.11	67.7	IPI00485483.3	acp6 Zgc:172268 protein	7955	8
1876	10.06	20.17	76.4	IPI00854267.1	zgc:165618 Zgc:165618 protein	7955	16
1877	10.06	10.11	64.1	IPI00972352.1	zgc:153032 Uncharacterized protein	7955	7
1878	10.05	34.86	85.8	IPI00611053.1	pgam1b Phosphoglycerate mutase	7955	45
1879	10.05	10.13	75.3	IPI00899623.3	gch1 Uncharacterized protein	7955	7
1880	10.05	10.22	87.6	IPI00931988.1	glrx Glrx protein	7955	8
1881	10.04	10.91	69.4	IPI00637339.4	LOC100000126 V-FBPL	7955	7
1882	10.04	12.61	57.4	IPI00972142.1	adkb Uncharacterized protein (Fragment)	7955	7
1883	10.04	12.39	58.2	IPI01005760.1	LOC555409 interferon-induced protein 44-like	7955	11
1884	10.03	21.21	73.3	IPI00510045.1	cdc42 Cell division cycle 42	7955	13
1885	10.03	11.29	50.7	IPI00803766.2	zgc:165670 Phospholysine phosphohistidine inorganic pyrophosphate phosphatase	7955	6
1886	10.03	11.9	67.3	IPI00901625.1	wu:fk48d07 Uncharacterized protein	7955	9
1887	10.02	17.07	73.9	IPI00497507.1	rdh12l Retinol dehydrogenase 12, like	7955	10
1888	10.02	10.17	38	IPI00742501.1	zgc:136890 Zgc:136890	7955	11
1889	10.02	10.35	65.3	IPI00851903.1	ambpl protein AMBP precursor	7955	8
1890	10.02	10.16	36.5	IPI00897908.2	si:dkey-250d21.1 hypothetical protein LOC402835	7955	10
1891	10.01	29.33	71.5	IPI00502651.2	fbp1a Uncharacterized protein	7955	37
1892	10.01	10.05	67.1	IPI00919589.1	ca5 Uncharacterized protein	7955	7
1893	10.01	23.2	64.2	IPI00993881.1	iqgap1 Uncharacterized protein	7955	25
1894	10	15.09	82.1	IPI00494766.3	rpl35 60S ribosomal protein L35	7955	9
1895	10	10	79.9	IPI00511011.2	tomm22 Uncharacterized protein	7955	7
1896	10	10.08	42.5	IPI00631070.2	zgc:110188 Zgc:110188	7955	5
1897	9.97	10.12	73.8	IPI00482560.2	stx12 Uncharacterized protein	7955	6
1898	9.97	13.13	63.4	IPI00485130.2	vapal VAMP (Vesicle-associated membrane protein)-associated protein A, like	7955	11
1899	9.95	11.1	53.5	IPI00494963.5	ptcd3 Pentatricopeptide repeat-containing protein 3, mitochondrial	7955	10
1900	9.91	10.01	66.7	IPI00488279.1	dye Nuclear pore complex protein Nup93	7955	10
1901	9.9	10.65	59.3	IPI00509742.2	sirt5 Uncharacterized protein	7955	8
1902	9.89	10.13	53.2	IPI00483085.2	surf4l Uncharacterized protein	7955	10
1903	9.89	15	76.8	IPI00512118.1	ppid Peptidylprolyl isomerase D	7955	11
1904	9.88	12.03	47.9	IPI00492757.3	zgc:158387 microsomal glutathione S-transferase-like	7955	9
1905	9.86	9.91	51.6	IPI00503950.3	rab3gap1 Rab3 GTPase-activating protein catalytic subunit	7955	8
1906	9.85	9.87	58.1	IPI00488379.2	lpp Lpp protein	7955	8
1907	9.85	9.92	63.2	IPI00512642.1	golga5 Golgin subfamily A member 5	7955	6
1908	9.85	10.24	57.4	IPI01024139.1	zgc:110773 Mannose-6-phosphate isomerase	7955	10
1909	9.84	10.54	47.8	IPI00492626.1	ctsa Zgc:65802	7955	14
1910	9.84	13.45	50	IPI00494027.2	cpne3 Copine III	7955	16
1911	9.81	10.17	61	IPI00488707.3	rnpep Uncharacterized protein	7955	11
1912	9.81	14.62	56.2	IPI00770464.2	LOC100331409 Uncharacterized protein	7955	12
1913	9.79	35.69	97.3	IPI00614099.1	zgc:173994 Zgc:173994 protein	7955	33
1914	9.79	9.95	44.3	IPI00897829.2	zgc:194887 Uncharacterized protein	7955	7
1915	9.78	12.01	69	IPI00570076.1	zgc:110346 Proteasome subunit beta type	7955	10
1916	9.77	10.15	71	IPI00502973.1	mki67ip MKI67 FHA domain-interacting nucleolar phosphoprotein	7955	7
1917	9.77	10.1	70.6	IPI00616946.5	exoc3 Uncharacterized protein	7955	10
1918	9.74	9.77	97.9	IPI00497950.1	zgc:92895 Mitochondrial import inner membrane translocase subunit Tim13	7955	12
1919	9.74	10.49	49.8	IPI00931140.2	zgc:158843 Uncharacterized protein	7955	7
1920	9.74	9.9	82.9	IPI00995230.1	zgc:63904 Uncharacterized protein	7955	8
1921	9.73	9.85	65.3	IPI00898762.1	trim25 Zgc:55773	7955	10
1922	9.73	9.98	63.3	IPI00968569.2	lonp2 Lon protease homolog	7955	6
1923	9.73	9.82	50.3	IPI00998456.1	LOC100333484 Uncharacterized protein	7955	7
1924	9.72	20.18	84.4	IPI00492274.1	pvalb3 Uncharacterized protein	7955	12
1925	9.71	9.84	63.6	IPI00488319.4	si:dkey-44g23.7;LOC567163 Uncharacterized protein	7955	10
1926	9.71	9.85	76.3	IPI00493498.1	snrpd2 Uncharacterized protein	7955	9
1927	9.71	10.36	60.9	IPI00510365.1	zgc:103668 Zgc:103668	7955	6
1928	9.71	9.97	73.2	IPI00616893.2	zgc:153887 Zgc:153887	7955	14
1929	9.7	30.57	59.8	IPI00510780.6	atp2a3 sarcoplasmic/endoplasmic reticulum calcium ATPase 3	7955	26
1930	9.7	10.08	51.7	IPI00758807.2	gale Uncharacterized protein	7955	7
1931	9.7	9.79	64.7	IPI00962078.2	LOC795897 saxitoxin and tetrodotoxin-binding protein 2-like	7955	5
1932	9.69	9.97	63.2	IPI00482562.2	twf1b Uncharacterized protein	7955	7
1933	9.69	9.94	59	IPI00500950.1	cops5 COP9 signalosome complex subunit 5	7955	8
1934	9.68	9.94	54.5	IPI00972152.1	smarcc1 Uncharacterized protein	7955	8
1935	9.67	9.75	50.5	IPI00485012.2	zgc:113200 Zgc:113200	7955	7
1936	9.66	9.66	92.5	IPI00498052.1	zgc:77820 Zgc:77820	7955	8
1937	9.65	9.67	61.9	IPI00498167.1	snrpb Uncharacterized protein	7955	7
1938	9.65	9.85	51.5	IPI00508355.2	zgc:112020 Zgc:112020	7955	8
1939	9.64	11.87	61.7	IPI00504102.3	gbp2 Uncharacterized protein	7955	8
1940	9.64	9.98	55.7	IPI00817229.2	kdsr Uncharacterized protein	7955	8
1941	9.64	9.86	73.3	IPI00933592.2	hsd17b3 Uncharacterized protein	7955	8
1942	9.62	9.66	48.4	IPI00817657.2	zgc:56194 zgc:56194	7955	11
1943	9.62	9.75	46.3	IPI00901919.2	LOC567370 ubiquitin-like modifier-activating enzyme 6-like	7955	11
1944	9.61	9.66	62.3	IPI00509122.1	lsm14aa Uncharacterized protein	7955	7
1945	9.61	9.64	64	IPI00511385.9	srrt Serrate RNA effector molecule homolog	7955	7
1946	9.59	11.87	88.9	IPI00817460.1	zgc:77155 Uncharacterized protein	7955	10
1947	9.58	9.84	62.8	IPI00803476.3	bat5l;bat5 Bat5l protein	7955	9
1948	9.58	9.76	60.7	IPI00864146.3	ppp1r12a protein phosphatase 1 regulatory subunit 12A	7955	7
1949	9.57	9.97	66.1	IPI00483756.4	LOC402879 LOC402879 protein (Fragment)	7955	5
1950	9.57	15.76	74	IPI00488764.2	dnm2l Uncharacterized protein	7955	15
1951	9.57	9.63	72.8	IPI00490957.2	sltm SAFB-like transcription modulator	7955	6
1952	9.57	9.75	46.8	IPI00996477.1	LOC565211 Uncharacterized protein	7955	6
1953	9.56	9.88	39.2	IPI00855533.1	dpp7 Uncharacterized protein	7955	8
1954	9.55	9.58	73.9	IPI00868348.1	zgc:171772 Zgc:171772 protein	7955	9
1955	9.55	9.71	49.3	IPI00993105.1	ppp6r3 Uncharacterized protein	7955	7
1956	9.54	9.7	63.7	IPI00505709.1	twf1a Twinfilin, actin-binding protein, homolog 1a	7955	6
1957	9.54	9.76	72	IPI00836638.1	pabpn1 polyadenylate-binding protein nuclear 1 isoform 2	7955	7
1958	9.53	9.88	63.1	IPI00497552.3	si:dkey-222f8.3 Si:dkey-222f8.3 protein	7955	9
1959	9.53	9.68	61.9	IPI00502388.2	ada Uncharacterized protein	7955	5
1960	9.53	10.46	53.8	IPI00503410.1	prpf40a Uncharacterized protein	7955	11
1961	9.51	9.73	57.8	IPI00512152.1	tpst1 Protein-tyrosine sulfotransferase 1	7955	6
1962	9.51	20.88	55.8	IPI00513541.1	zgc:77556 Zgc:77556	7955	12
1963	9.51	9.59	68.4	IPI00613628.2	zgc:92607 Acyl carrier protein	7955	9
1964	9.48	10.25	59.8	IPI00491682.1	atp6v1h Uncharacterized protein	7955	9
1965	9.46	9.62	68.4	IPI00497601.1	cstf3 Cleavage stimulation factor, 3' pre-RNA, subunit 3	7955	15
1966	9.45	9.55	64	IPI00770314.3	zgc:158685 protein phosphatase 3, catalytic subunit, gamma isoform	7955	9
1967	9.45	10.01	79.2	IPI01004717.1	timm44 Translocase of inner mitochondrial membrane 44 homolog	7955	7
1968	9.44	9.49	47.2	IPI00996936.1	zgc:92151 Zgc:92151 protein	7955	9
1969	9.41	9.42	74.3	IPI00804617.1	zgc:153129 Zgc:153129	7955	9
1970	9.4	9.48	49.1	IPI00502952.2	zgc:63600 spermidine synthase	7955	6
1971	9.38	9.77	65.6	IPI00488445.5	irgf1 Uncharacterized protein	7955	6
1972	9.38	22.15	69.9	IPI00497482.1	zgc:77052 Zgc:77052	7955	20
1973	9.37	13.79	67.6	IPI00497704.1	calub Calumenin-B	7955	10
1974	9.35	9.44	88.1	IPI00489786.1	nola1 H/ACA ribonucleoprotein complex subunit 1	7955	5
1975	9.35	9.36	90.6	IPI00497597.2	nhp2l1 Uncharacterized protein	7955	10
1976	9.35	9.49	59.3	IPI00650322.2	zgc:153813 Zgc:153813 protein (Fragment)	7955	8
1977	9.35	10.71	63.2	IPI00961844.2	atp11c probable phospholipid-transporting ATPase IG	7955	19
1978	9.34	9.45	63.8	IPI00497491.2	cygb1 Cytoglobin-1	7955	7
1979	9.31	9.9	49.4	IPI00504575.1	tnpo3 Uncharacterized protein	7955	9
1980	9.31	9.6	47.6	IPI00901880.3	entpd8 ectonucleoside triphosphate diphosphohydrolase-like	7955	11
1981	9.29	9.49	60.5	IPI00484345.2	zgc:92458 Zgc:92458	7955	6
1982	9.29	10.41	57.2	IPI00495186.1	ubxn4 UBX domain protein 4	7955	6
1983	9.29	9.52	53.3	IPI00997848.1	- Uncharacterized protein (Fragment)	7955	9
1984	9.28	16.91	93.3	IPI00482815.1	clic4 Uncharacterized protein	7955	13
1985	9.28	10.19	47	IPI00490490.1	pdcd6 Uncharacterized protein	7955	6
1986	9.28	9.37	40.9	IPI00492190.1	tram1 Uncharacterized protein	7955	5
1987	9.26	9.33	59.8	IPI00496921.1	ppm1g Protein phosphatase 1G (Formerly 2C), magnesium-dependent, gamma isoform	7955	9
1988	9.26	34.81	70	IPI00631848.2	ddx39b Uncharacterized protein	7955	30
1989	9.25	9.3	47.3	IPI00882601.3	strn3 Uncharacterized protein	7955	6
1990	9.25	9.49	62.6	IPI00994608.1	stau2 double-stranded RNA-binding protein Staufen homolog 2	7955	9
1991	9.24	40.06	76.5	IPI00835722.2	zgc:158846 Zgc:158846 protein	7955	62
1992	9.23	9.26	43.2	IPI00759134.1	nup205 Nup205 protein	7955	17
1993	9.2	30.86	82.5	IPI00488839.1	eif2s1l Uncharacterized protein	7955	21
1994	9.2	9.91	60.7	IPI00505873.3	LOC555899 Uncharacterized protein	7955	9
1995	9.18	13.49	65.3	IPI00829298.4	pds5a Uncharacterized protein	7955	11
1996	9.17	9.44	67.2	IPI00485399.9	LOC555425 armadillo repeat-containing protein 6-like	7955	5
1997	9.14	9.19	58.3	IPI00482677.3	gmppab Mannose-1-phosphate guanyltransferase alpha-B	7955	6
1998	9.14	9.3	69	IPI00509522.4	zgc:56136 Uncharacterized protein	7955	6
1999	9.13	9.34	54.6	IPI00506760.1	mt-nd5 NADH-ubiquinone oxidoreductase chain 5	7955	10
[truncated: 2,791 more rows]
