# Supplementary material for: Dramatic Improvement of Proteomic Analysis of Zebrafish Liver Tumor by Effective Protein Extraction with Sodium Deoxycholate and Heat Denaturation
Source: Int J Anal Chem. 2015 Mar 19;2015:763969. doi: 10.1155/2015/763969 (PMC4383156; doi:10.1155/2015/763969)
Supplement: Supplementary file 1 — The Supplementary material contains our identified protein list from our 1D shotgun analysis for both DOCΔX (Supplementary Table 1) and SDSΔX (Supplementary Table 2) samples. Supplementary Table 3 contains our identified protein list from our 2D shotgun analysis for DOCΔX sample. Supplementary Table 4 contains the list of representative “canonical pathways” and “diseases and biological functions” with the respective proteins from our identified protein list from Supplementary Table 3 that we obtained from our pathway analysis using IPA. Supplementary Data 1 contains the chromatograms from our 1D (both DOCΔX and SDSΔX) and 2D shotgun analysis (DOCΔX). [file 763969.f1.zip › Supplementary_Table_4.xls]

## Sheet: Sheet0
Ingenuity Canonical Pathways	Molecules
Molecular Mechanisms of Cancer	MAP2K4,PRKACB,SHH,RAC2,WNT10B,JAK1,MAPK1,PIK3R1,HRAS,NCSTN,CCND1,MYC,RHOG,CASP9,CAMK2D,MAP2K2,MAPK3,MRAS,GNA13,RASA1,TAB1,SMAD2,AKT2,CASP3,RRAS,TYK2,RALB,RAC1,NFKB2,RAP1A,RALBP1,CDH1,PTPN11,CDC42,RHOA,PRKCD,GNAO1,CDK2,FNBP1,RAP1B,MAP2K6,RELA,RALA,PA2G4,RHOT2,CRK,PSEN2,SMAD5,PRKAG1,CASP6,AKT1,CDK5,RHOT1,CASP8,PRKCA,ITGB1,NRAS,ARHGEF12,GNAS,HAT1,GRB2,RHOC,ITGA2,PRKAR2A,GNAI1,BAX,FADD,GNAI3,PLCB4,CD…
Wnt/β-catenin Signaling	WNT10B,PPP2R2A,MARK2,ILK,TLE1,HNF1A,CCND1,MYC,APPL1,AKT1,PPP2R2C,CSNK2B,TAB1,AKT2,APPL2,PPP2R5D,ACVR1,ACVR1B,PPP2CB,CDH2,CDH1,PPP2R4,GNAO1,PIN1,PPP2R5E,PPP2R1B,LRP1,ACVR2A
HGF/c-MET Signaling	MAP2K4,RAP1B,MAPK1,PIK3R1,HRAS,CCND1,AKT1,MAP2K2,MAPK3,MRAS,PRKCA,ITGB1,AKT2,NRAS,RRAS,GRB2,CRKL,ITGA2,RAC1,RAP1A,ATF2,MET,PRKCI,PTPN11,CDC42,PRKCD,PLCG2,CDK2
IGF Signaling	PRKACB,IGFBP4,JAK1,MAPK1,YWHAH,PIK3R1,PDPK1,HRAS,PRKAG1,YWHAQ,CASP9,AKT1,MAP2K2,IGF1,MAPK3,MRAS,IGFBP1,CSNK2B,RASA1,RPS6KB1,AKT2,NRAS,YWHAE,GRB2,RRAS,YWHAB,PRKAR2A,YWHAZ,PRKCI,PTPN11,FOXO1,PRKAR1A
PI3K/AKT/mTOR Signaling	EIF3C,MAPK1,PRKAB2,RPS27,PIK3R1,HRAS,PDPK1,RPS23,RPS11,RPS7,RHOG,RPS20,RPS13,MAPK3,INS,MRAS,PRKAA1,AKT1S1,EIF4B,RPS6KB1,AKT2,PLD3,RRAS,RAC1,VEGFC,EIF3E,EIF3M,RPS6,PPP2CB,FAU,PPP2R4,RHOA,EIF4A3,PRKCD,RPS25,RPS15A,INSR,FNBP1,RPSA,EIF3K,PPP2R2A,RPS18,RHOT2,FKBP1A,RPS8,RPS4X,EIF4E,PRKAG1,EIF4EBP1,RPS28,HMOX1,MTOR,AKT1,RHOT1,RPS9,EIF3A,PPP2R2C,RPS3,RPS5,RPS17,PRKCA,RPS24,NRAS,EIF3H,RHOC,PPP2R5D,RPS19,…
MAPK Signaling	PRKACB,RAC2,MAPK1,YWHAH,PIK3R1,HRAS,TLN1,MYC,YWHAQ,MAP2K2,MAPK3,MRAS,PPP1CA,YWHAB,RRAS,CRKL,RAC1,YWHAZ,PPP1R11,RAP1A,ATF2,PLA2G6,PPP2CB,ARAF,PPP2R4,PLCG2,PRKCD,HSPB1,RAP1B,PPP2R2A,CRK,PRKAG1,EIF4E,EIF4EBP1,PPP1R12A,PPP2R2C,PLA2G12B,STAT1,PRKCA,ITGB1,NRAS,GRB2,PPP2R5D,PLA2G4C,ITGA2,PRKAR2A,PRKCI,PAK2,PPP2R5E,PPP2R1B,PRKAR1A
JAK/STAT Signaling	RELA,STAT6,PTPN6,AKT2,JAK1,NRAS,MAPK1,GRB2,RRAS,PIK3R1,TYK2,HRAS,NFKB2,MTOR,AKT1,MAP2K2,PTPN11,MAPK3,MRAS,STAT5B,STAT1
TGFβ Signaling	MAP2K4,MAP2K6,SMAD2,NRAS,MAPK1,GRB2,RRAS,ACVR1,HRAS,SMAD5,ACVR1B,INHBA,MAP2K2,RNF111,CDC42,MAPK3,MRAS,SMURF2,HNF4A,ACVR2A,TAB1
Diseases and Biological Functions
Categories	Diseases or Functions Annotation	Molecules	# Molecules
Cancer	Cancer	A1CF,A2M,AAAS,AACS,AAMP,AARS,AASS,ABAT,ABCB4,ABCB6,ABCB8,ABCC12,ABCC2,ABCC4,ABCD3,ABCE1,ABCF1,ABCF2,ABCF3,ABCG8,ABHD14B,ABHD6,abscisic acid,ACAA1,ACAA2,ACACA,ACACB,ACAD8,ACADL,ACADM,ACADS,ACADVL,ACAN,ACAT1,ACAT2,ACBD3,ACBD7,ACIN1,ACLY,ACMSD,ACO1,ACO2,ACOT11,ACOT7,ACOT9,ACOX1,ACOX3,ACOXL,ACP1,ACP2,ACP6,ACSBG1,ACSF3,ACSL3,ACSL4,ACSS1,ACTG2,ACTN4,ACTR1B,ACTR2,ACTR3,ACVR1,ACVR1B,ACVR2A,ACY3,ADAL,ADAM…	2545
Cancer	carcinoma	A1CF,AAAS,AACS,AAMP,AARS,AASS,ABAT,ABCB4,ABCB8,ABCC12,ABCC2,ABCC4,ABCD3,ABCE1,ABCF1,ABCF3,ABCG8,ABHD6,ACAA1,ACAA2,ACACA,ACACB,ACAD8,ACADM,ACADS,ACADVL,ACAN,ACAT1,ACAT2,ACBD3,ACBD7,ACIN1,ACLY,ACMSD,ACO1,ACO2,ACOT7,ACOT9,ACOX1,ACOX3,ACP1,ACP6,ACSF3,ACSL3,ACSL4,ACSS1,ACTG2,ACTN4,ACTR2,ACTR3,ACVR1,ACVR1B,ACVR2A,ADAL,ADAMTSL3,ADAR,ADARB1,ADCK5,ADD1,ADD3,ADH5,ADK,ADRM1,ADSL,ADSS,AGK,AGL,AGMO,AGO2,AGO3,…	2068
Cancer	metastasis	AGR2,AKR1C1/AKR1C2,AKT1,AKT2,ALCAM,AMBP,ANK3,ANPEP,ANXA1,APOA1,ARAF,ARF6,ARRB2,ASAH1,ATF2,ATIC,B2M,BAX,C1QBP,CAPG,CASP1,CASP3,CASP8,CASP9,CAT,CAV1,CBR1,CCND1,CD226,CD9,CDH1,CDH2,CDK5,CDK5RAP3,CLGN,CNN1,COL18A1,COL4A2,COL6A3,CRYZ,CTSB,CTTN,CXCL12,CYP3A7,DAPK1,DCC,DMD,DNAJB6,DPYSL2,DYNLRB1,EEF1A1,EGFR,EIF4A1,EMP1,EPB41L3,EPCAM,ERAP2,EZR,F2,FADD,FAF1,FDFT1,FGG,FGR,FKBP1A,FLT3,fludarabine phosphate,F…	198
Cancer	advanced malignant tumor	AGR2,AKR1C1/AKR1C2,AKT1,AKT2,ALCAM,ALDH1A2,AMBP,ANK3,ANPEP,ANXA1,APOA1,ARAF,ARF6,ARRB2,ASAH1,ATF2,ATIC,B2M,BAX,C1QBP,C4A/C4B,CALB2,CAPG,CASP1,CASP3,CASP8,CASP9,CAT,CAV1,CBR1,CCND1,CD226,CD9,CDH1,CDH2,CDK5,CDK5RAP3,CFH,CLGN,CNN1,COL18A1,COL4A2,COL6A3,CRYZ,CTSB,CTTN,CXCL12,CYP3A7,DAPK1,DCC,DHTKD1,DMD,DNAJB6,DPYSL2,DYNLRB1,EEF1A1,EGFR,EIF4A1,EMP1,EPB41L3,EPCAM,ERAP2,EZR,F2,FADD,FAF1,FDFT1,FGG,FGR,FK…	213
Cancer, Cell Death and Survival, Tumor Morphology	apoptosis of tumor cells	AIFM1,AIMP1,AKT1,AKT1S1,AKT2,ALB,ANPEP,ANXA1,ANXA2,ATF2,ATXN2,B2M,BAG1,BAX,BLNK,BSG,BTK,CASP1,CASP3,CASP6,CASP8,CASP9,CAT,CAV1,CDH1,CDK1,CDK2,COL18A1,CTSB,CXCL12,DAPK1,EGFR,ENO1,F2,FADD,FHIT,FOXO1,GDF15,GNB2L1,HRAS,IGF1,IGHM,IL2,INSR,ITGAV,KDR,LGALS1,LGALS9,LPAR1,MAPK1,MET,MTOR,MYC,NFE2L2,NRAS,PARP1,PAX3,PIK3R1,PIN1,PLG,PON2,PRKCD,RAC1,RAD50,RELA,RHOA,SHH,SMARCA4,SPARC,TF,THOC1,THRB,TIMP1,TIMP2,T…	82
Cancer, Gastrointestinal Disease, Hepatic System Disease	liver tumor	A1CF,AAAS,AAMP,AASS,ABCB4,ABCC12,ABCC2,ABCC4,ABCF3,ABCG8,ACAA1,ACAA2,ACACB,ACADVL,ACAN,ACBD3,ACLY,ACO1,ACO2,ACOT7,ACOX1,ACOX3,ACP1,ACSF3,ACTG2,ACTR2,ACTR3,ACVR1,ACVR1B,ACVR2A,ADAL,ADAMTSL3,ADARB1,ADD1,ADH5,ADRM1,AGK,AGO2,AGT,AHDC1,AHNAK,AIFM1,AIFM2,AK2,AKAP9,AKR1C1/AKR1C2,AKT1,ALB,ALCAM,ALDH4A1,ALDH7A1,ALDH9A1,ALDOB,ALG5,ALG6,ALOX5,AMBP,AMFR,AMPD3,AMT,ANK3,ANKIB1,ANO5,ANP32B,ANPEP,ANXA1,ANXA2,ANX…	1043
Cancer, Gastrointestinal Disease, Hepatic System Disease	liver cancer	A1CF,AAAS,AAMP,AASS,ABCB4,ABCC12,ABCC2,ABCC4,ABCF3,ABCG8,ACAA1,ACAA2,ACACB,ACADVL,ACAN,ACBD3,ACLY,ACO1,ACO2,ACOT7,ACOX1,ACOX3,ACP1,ACSF3,ACTG2,ACTR2,ACTR3,ACVR1,ACVR1B,ACVR2A,ADAL,ADAMTSL3,ADARB1,ADD1,ADH5,ADRM1,AGK,AGO2,AGT,AHDC1,AHNAK,AIFM1,AIFM2,AK2,AKAP9,AKR1C1/AKR1C2,ALB,ALCAM,ALDH4A1,ALDH7A1,ALDH9A1,ALDOB,ALG5,ALG6,ALOX5,AMBP,AMFR,AMPD3,AMT,ANK3,ANKIB1,ANO5,ANP32B,ANPEP,ANXA1,ANXA2,ANXA3,AP…	1036
Cancer, Gastrointestinal Disease, Hepatic System Disease	incidence of hepatocellular carcinoma	ABCB4,ACOX1,BHMT,FAH,FHIT,GNMT,HRAS,HTATIP2,IQGAP1,MAD1L1,NR1H4,PINX1,PRDX1,PRKAR1A,RINT1,S100A4,SIRT2,SOD1,SPTBN1	19
Cancer, Tumor Morphology	invasion of tumor	AHCY,AKT1,AKT2,ALCAM,ANXA2,BSG,CAV1,CDH1,CDH17,CTSB,CTSS,CTSV,CTSZ,CTTN,CXCL12,DNM2,DSP,EDN1,EDN3,EGFR,EZR,F2,FERMT2,FKBP1A,FN1,GDF15,GPC1,HDLBP,HMGB1,HMOX1,HRAS,HSPA5,IGF1,ITGA2,ITGB1,JUP,KLK6,LGALS1,LHCGR,LIMK2,LRRC15,MAPK1,MET,MIEN1,NEDD9,NFE2L2,PAFAH1B1,PARK7,PLG,POSTN,PROX1,PSMD10,RAC1,RALBP1,RASGRP1,RGN,RHOA,RHOG,SCRIB,SETDB1,SPINT1,TDGF1,TGFA,THRB,TIMP2,TLR4,VEGFC,VIM,ZFYVE21	69
Cell Cycle	cell cycle progression	ADARB1,AGT,AGTR2,AK1,AKAP9,AKT1,ARPC5,ATE1,BAX,BCCIP,BIRC6,BLNK,BTG1,BTK,BUB3,C1QBP,C5,CALR,CASP3,CASP6,CAV1,CCND1,CCNG1,CCNK,CCT4,CD320,CD4,CDC27,CDC37,Cdc42,CDC42,CDH1,CDK1,CDK2,CDK5,CDK5R1,CDK5RAP3,CDKN2D,CIRBP,CKAP5,CLIP1,CLTC,COL1A1,COPS5,CRK,CSNK2B,CUL1,CUL2,CUL3,CUL5,CXCL12,CYLD,DBF4,DBI,DCTN2,DDX17,DHX9,DRD2,DYNC1H1,DYNLT3,E4F1,EDN1,EDN3,EGFR,EIF3E,EIF4E,EIF4EBP1,EMP1,EPCAM,EWSR1,EZR,F2,F…	268
Cell Cycle	interphase	ACIN1,ACVR1,ACVR1B,AGK,AGT,AKT1,ANXA2,ARAF,ATF2,ATRX,BAG3,BAX,BTG1,BTK,CAMK1,CAMK2D,CAMKK1,CAPNS1,CAT,CAV1,CBX1,CCND1,CCNG1,CDC42,CDC5L,CDH1,CDK1,CDK2,CDK5RAP3,CDKN2D,CDS1,CEL,COPS5,CREM,CSNK2B,CUL2,CUL3,CUL5,CXCL12,CYLD,DARS,DBF4,DCC,DCN,DTD1,E4F1,EDN3,EGFR,EIF3E,EIF4E,EIF4EBP1,ELAVL1,F2,FADD,FCER2,FHIT,FKBP1A,FLT3,FN1,FOXO1,GDF15,GNB2L1,GNL3,GORASP2,GPC1,GPI,GRB2,GSPT1,GTF2I,HMGN1,HMOX1,HNF1A,H…	176
Cell Cycle	mitosis	AGT,AKT1,ATE1,BUB3,C5,CCND1,CCT4,CD4,Cdc42,CDK1,CDK2,CKAP5,CLIP1,CLTC,CRK,CSNK2B,CYLD,DBF4,DBI,DCTN2,DHX9,DRD2,DYNC1H1,DYNLT3,E4F1,EDN1,EDN3,EGFR,EIF3E,EWSR1,F2,GNA13,GNAI3,GNL3,GOLGA2,GRB2,HAT1,HNF4A,HRAS,IGF1,IGF2,IK,IL2,ILK,INHBA,INPP5D,INS,INSR,ITGAL,KAT8,KDR,KNTC1,KPNB1,KRT18,LAMTOR5,LRAT,MAD1L1,MAPK1,MAPK3,MET,MRE11A,MTOR,MYC,MYH10,NAE1,NCOA4,NEK9,NUBP1,NUDCD3,PAFAH1B1,PAK2,PDLIM7,PDS5A,PEB…	132
Cell Cycle	G1 phase	ACIN1,ACVR1,ACVR1B,AGT,AKT1,BAG3,BAX,BTK,CAMK1,CAMK2D,CAMKK1,CAPNS1,CBX1,CCND1,CCNG1,CDC42,CDK1,CDK2,CDK5RAP3,CDKN2D,CDS1,CEL,COPS5,CREM,CSNK2B,CUL2,CUL3,CUL5,CYLD,DARS,DCN,DTD1,E4F1,EDN3,EGFR,EIF4E,EIF4EBP1,ELAVL1,FADD,FCER2,FKBP1A,FLT3,FN1,FOXO1,GDF15,GNB2L1,GNL3,GPI,GSPT1,HNF1A,HRAS,ID4,IFNA2,IGF1,IGF2,IGHM,IL2,ILK,INHBA,INS,INSR,ITGAV,ITGB1,KDR,KLK3,LGALS1,LGALS3,MAP2K6,MAPK1,MAPK3,MET,MTOR,M…	107
Cell Cycle	fission	BAX,BCAP31,DAP3,DNM1L,GDAP1,ITSN1,KIF5B,MFF,MTFP1,MTOR,OPA1,PEX11B,PEX19,TNFSF10,TOP1	15
Cell Cycle	arrest in interphase of tumor cell lines	ACIN1,AGK,AKT1,ANXA2,ATF2,CAMK1,CAMKK1,CAT,CBX1,CCND1,CCNG1,CDC42,CDK1,CDK2,CDK5RAP3,CEL,CREM,DCC,DCN,EGFR,ELAVL1,FADD,FHIT,FLT3,FOXO1,GDF15,GNL3,GSPT1,HNF1A,HRAS,IFNA2,IGF1,IGF2,IGHM,ILK,ITGAV,ITGB1,KLK3,LGALS1,LGALS3,MAP2K6,MET,MTCH2,MTDH,MTOR,MYC,NFE2L2,PDCD6,PPP2CB,PPP2R2A,PRKAA1,PRPF8,PSEN2,PTGES3,RBCK1,RHOA,RPA1,RPL11,RPL23,RPL5,RPL7A,RPS6,SMARCA1,SPTAN1,STK38,TCP1,TFRC,THRB,WEE1,XRCC1	70
Cell Cycle	interphase of tumor cell lines	ACIN1,AGK,AKT1,ANXA2,ATF2,BAX,CAMK1,CAMKK1,CAT,CBX1,CCND1,CCNG1,CDC42,CDH1,CDK1,CDK2,CDK5RAP3,CEL,COPS5,CREM,DARS,DCC,DCN,DTD1,EGFR,EIF3E,ELAVL1,F2,FADD,FHIT,FLT3,FOXO1,GDF15,GNL3,GORASP2,GSPT1,HMOX1,HNF1A,HRAS,IFNA2,IGF1,IGF2,IGHM,ILK,INSR,ITGAV,ITGB1,KLK3,LGALS1,LGALS3,MAP2K6,MET,MPG,MTCH2,MTDH,MTOR,MYC,NAE1,NFE2L2,NPM1,PDCD6,PIN1,PPIF,PPP2CB,PPP2R2A,PRKAA1,PRPF8,PSAP,PSEN2,PTGES3,PTPN6,RBCK1,R…	93
Cell Cycle	arrest in G1 phase of tumor cell lines	ACIN1,CAMK1,CAMKK1,CBX1,CCND1,CCNG1,CDC42,CDK2,CDK5RAP3,CEL,CREM,DCN,EGFR,FLT3,FOXO1,GDF15,GNL3,GSPT1,HNF1A,IFNA2,IGF1,IGHM,ILK,ITGAV,ITGB1,KLK3,LGALS1,LGALS3,MET,MTOR,MYC,NFE2L2,PRPF8,PSEN2,PTGES3,RHOA,RPL11,RPL23,RPL5,RPL7A,RPS6,SPTAN1,STK38,TFRC	44
Cell Death and Survival	cell death	2210010C04Rik,A2M,AARS,ABCB4,ABCB8,ABCC4,ABCE1,ACACA,ACAT1,ACIN1,ACLY,ACP1,ACSL4,ACTN4,ACVR1B,ADAR,ADARB1,ADD1,ADD3,ADH5,ADK,ADRM1,AFG3L2,AGA,AGO2,AGO3,AGR2,AGT,AGTR2,AIFM1,AIFM2,AIMP1,AK1,AKR1B1,AKT1,AKT1S1,AKT2,ALB,ALCAM,ALDH1A2,ALDH1L1,ALDH2,ALDOA,ALDOC,ALOX5,AMFR,AMPD3,Ang4,ANK3,ANPEP,ANXA1,ANXA11,ANXA2,ANXA4,AP1G1,AP2B1,APEX1,API5,APIP,APMAP,APOA1,APPL1,APRT,ARAF,ARF4,ARF6,ARFIP2,ARG2,ARHGAP…	938
Cell Death and Survival	cell death of tumor cell lines	ABCB4,ABCC4,ABCE1,ACACA,ACVR1B,ADRM1,AGR2,AGT,AGTR2,AIFM1,AIMP1,AKR1B1,AKT1,AKT1S1,AKT2,ALB,ALCAM,ALDH1L1,ALOX5,ANXA2,APEX1,API5,APMAP,ARHGDIA,ARL6IP1,ARMC10,ARRB2,AS3MT,ASAH1,ATF2,ATN1,ATP1A1,ATP2A1,ATP5A1,ATXN3,B2M,BAG1,BAG3,BAG6,BAX,BIRC6,BLNK,BNIP2,BNIP3,BTG1,BTK,C5,CALR,CAPN1,CAPNS1,CASP1,CASP3,CASP6,CASP7,CASP8,CASP9,CAT,CAV1,CBR1,CBX5,CCDC80,CCND1,CCNG1,CCT4,CCT5,CCT6A,CCT8,CD4,CD79B,CDC42…	455
Cell Death and Survival	necrosis	2210010C04Rik,A2M,AARS,ABCB4,ABCB8,ABCC4,ABCE1,ACACA,ACAT1,ACLY,ACP1,ACVR1B,ADAR,ADARB1,ADRM1,AGA,AGR2,AGT,AGTR2,AIFM1,AIMP1,AKR1B1,AKT1,AKT1S1,AKT2,ALB,ALCAM,ALDH1A2,ALDH1L1,ALDH2,ALDOA,ALOX5,Ang4,ANPEP,ANXA1,ANXA2,AP2B1,APEX1,API5,APIP,APMAP,APOA1,APRT,ARF6,ARFIP2,ARG2,ARHGAP18,ARHGDIA,ARL6IP1,ARMC10,ARRB2,AS3MT,ASAH1,ATF2,ATN1,ATP1A1,ATP2A1,ATP2B4,ATP5A1,ATRX,ATXN2,ATXN3,B2M,BAG1,BAG3,BAG6,BAX…	724
Cell Death and Survival	apoptosis	2210010C04Rik,A2M,AARS,ABCE1,ACACA,ACIN1,ACLY,ACSL4,ACTN4,ACVR1B,ADAR,ADH5,AGA,AGO2,AGO3,AGT,AGTR2,AIFM1,AIFM2,AIMP1,AKR1B1,AKT1,AKT1S1,AKT2,ALB,ALCAM,ALDH1A2,ALDH1L1,ALDH2,ALDOA,ALDOC,ALOX5,AMFR,Ang4,ANPEP,ANXA1,ANXA11,ANXA2,ANXA4,APEX1,API5,APIP,APOA1,APPL1,ARAF,ARF4,ARF6,ARG2,ARHGAP10,ARHGAP18,ARHGAP35,ARHGDIA,ARHGDIB,ARIH2,ARL6IP5,ARMC10,ARRB2,ASAH1,ASB2,ATF2,ATN1,ATP11C,ATP1A1,ATP2A1,ATP2B4,…	719
Cell Death and Survival	apoptosis of tumor cell lines	ABCE1,ACACA,ACVR1B,AGT,AGTR2,AIFM1,AIMP1,AKR1B1,AKT1,AKT1S1,AKT2,ALB,ALCAM,ALDH1L1,ALOX5,ANXA2,API5,ARHGDIA,ARMC10,ARRB2,ATF2,ATN1,ATP2A1,B2M,BAG1,BAG3,BAX,BIRC6,BLNK,BNIP2,BNIP3,BTK,C5,CALR,CAPN1,CAPNS1,CASP1,CASP3,CASP6,CASP7,CASP8,CASP9,CAT,CAV1,CBX5,CCDC80,CCND1,CCNG1,CCT4,CD4,CD79B,CDC42,CDH1,CDK1,CDK2,CDK5,CDK5R1,CDKN2D,CFH,CKAP5,CNN2,COL18A1,COL1A1,COL4A2,COPS5,COX5A,CREM,CRHR1,CTCF,CTH,CT…	346
Cell Death and Survival	cell viability	Abcb1b,ABCB4,ABCB6,ACLY,ACVR2A,ADAR,ADK,AGO2,AIFM1,AIMP1,AKT1,AKT2,ALB,ANKS1B,AP2B1,APEX1,ASAH1,ATF2,ATP5H,ATRX,BAG1,BAG3,BAX,BCAP31,BCKDK,BIRC6,BNIP2,BNIP3,BTK,C11orf31,C1GALT1,C3,C5,CA2,CALB2,CALR,CAMK2D,CAMLG,CARD11,CARS,CASK,CASP1,CASP3,CASP6,CASP7,CASP8,CASP9,CAT,CAV1,CBFB,CBR1,CCND1,CCNG1,CCNK,CD27,CD2AP,CD300A,CD4,CD81,CD9,CDC40,CDC42,CDH1,CDH2,CDK1,CDK2,CDK5,CDK5R1,CDKN2D,CKAP5,COL1A1,COP…	364
Cell Death and Survival	cell survival	Abcb1b,ABCB4,ABCB6,ACLY,ACVR2A,ADAR,ADK,AGO2,AIFM1,AIMP1,AKT1,AKT2,ALB,ALCAM,ANKS1B,AP2B1,APEX1,ASAH1,ATF2,ATP5H,ATRX,BAG1,BAG3,BAMBI,BANF1,BAX,BCAP31,BCKDK,BIRC6,BNIP2,BNIP3,BTK,C11orf31,C1GALT1,C3,C5,CA2,CALB2,CALR,CAMK2D,CAMLG,CARD11,CARS,CASK,CASP1,CASP3,CASP6,CASP7,CASP8,CASP9,CAT,CAV1,CBFB,CBR1,CCND1,CCNG1,CCNK,CD27,CD2AP,CD300A,CD4,CD81,CD9,CDC40,CDC42,CDH1,CDH2,CDK1,CDK2,CDK5,CDK5R1,CDKN2…	389
Cell Death and Survival	cell viability of tumor cell lines	ABCB6,ACVR2A,ADK,AGO2,AIFM1,AIMP1,AKT1,AKT2,ALB,ANKS1B,APEX1,ASAH1,ATF2,ATP5H,ATRX,BAG1,BAG3,BAX,BCKDK,BIRC6,BNIP2,BNIP3,C11orf31,C1GALT1,CA2,CAMK2D,CARS,CASK,CASP1,CASP3,CASP8,CASP9,CAT,CAV1,CBR1,CCND1,CCNG1,CCNK,CD81,CDH1,CDH2,CDK2,CDKN2D,CKAP5,COL1A1,COPB2,CPA1,CUL9,CXCL12,DCC,DHX9,DIS3,DNM2,DPP3,EEF2,EGFR,EIF3A,EIF3C,EIF3E,EIF4A3,EIF4E,ELAVL1,EWSR1,FADD,FDXR,FGR,FN1,GCLC,GDF15,GLUD1,GNB2L1,GP…	213
Cell Death and Survival	cytolysis	ADD1,ADD3,ADK,AK1,ALB,ALDOA,AMPD3,ANXA1,ARRB2,ATP5S,B2M,BAX,C1GALT1C1,C3,C4A/C4B,C5,C8A,C8B,C8G,CALR,CAMLG,CASP1,CAT,CAV1,CD226,CD4,CFB,CFH,CFI,CPOX,CR1,EGFR,EIF2AK1,EIF4E,fludarabine phosphate,G6PD,GCLC,GPI,GPX1,GSS,HBA1/HBA2,HK1,HLA-A,HMOX1,HNF4A,HPRT1,IFNA2,IGKC,IL12B,IL2,IL21R,IMPDH2,ITGAL,ITGB2,KRT18,M6PR,NFE2L2,OGDH,PFKM,PKLR,PLCG2,PPP1R15A,PPP3CC,PPP3R1,PRDX1,PRDX2,PRKAG1,PTPRC,PVR,RHCE/RH…	86
Cell Death and Survival	anoikis	AKT1,CASP8,CASP9,CAV1,CDH1,COL4A2,CTTN,DAP3,EEF1A1,EGFR,FADD,FN1,GNE,HRAS,IGF1,ILK,ITGAV,ITGB1,LGALS3,MAPK1,MTOR,NRAS,PRKCA,PRKCD,RAC1,RDX,RHOA,RRAS,TGFA,TGM2,TIMP1,TNFSF10,TPM1,UCHL1,VTN	35
Cell-To-Cell Signaling and Interaction	response of tumor cell lines	ANXA1,ARF6,ATXN3,CDC42,CDK5R1,CKB,CLIP1,CLTC,CSK,CTSD,DNM1L,EDN1,EIF4EBP1,GNA13,GOLGA4,GRB2,IGKC,IL2,INPP5D,IRF2BP1,ITGAM,JAK1,LMAN2,MPG,MTOR,MYC,PFN2,PLA2G6,PRKCD,PRKRA,PSMD4,PTPN6,RAC1,RALA,RALB,RELA,RHOA,RHOG,SF3A1,Sf3a2,TGM2,TLR3,TLR4,TO-901317,VIM,XRCC1	46
Cell-To-Cell Signaling and Interaction, Inflammatory Response	immune response of tumor cell lines	ANXA1,ARF6,ATXN3,CDC42,CDK5R1,CKB,CLIP1,CLTC,CSK,CTSD,DNM1L,EIF4EBP1,GNA13,GOLGA4,GRB2,IGKC,IL2,INPP5D,IRF2BP1,ITGAM,LMAN2,MPG,MTOR,MYC,PFN2,PLA2G6,PRKCD,PRKRA,PSMD4,PTPN6,RAC1,RALA,RALB,RELA,RHOA,RHOG,SF3A1,Sf3a2,TGM2,TLR4,TO-901317,VIM,XRCC1	43
Cell-To-Cell Signaling and Interaction, Tissue Development	adhesion of tumor cell lines	ACP1,AKT1,ALCAM,ANXA1,ANXA2,BSG,C1QBP,CASP8,CAV1,CD4,CD81,CD9,CDC42,CDH1,CDH2,CRK,CSK,CTSZ,CXCL12,CYP2J2,DBF4,DCN,DSP,DYSF,EGFR,EPCAM,F10,F2,FGA,FN1,FOXO1,GNA13,GNB2L1,HMGB1,HRAS,IGF1,IL6R,ILK,ITGA2,ITGA9,ITGAL,ITGAM,ITGAV,ITGB1,ITGB2,KLK3,LGALS3,LGALS8,MAP2K2,MAPK1,MINK1,MLLT4,MYH9,MYO6,NEU1,NEU3,PAK2,PARVA,PIK3R1,PRKCA,PROC,PSMD4,PTGES3,PTPN14,PTPN6,RAB21,RAC1,RELA,RHOA,ROCK2,RPSA,SDC2,SNX1,SPN…	83
Cellular Development, Cellular Growth and Proliferation	proliferation of tumor cell lines	A2M,ABCB6,ACACA,ACAT1,ACIN1,ACSL4,ACTN4,ACVR1,ACVR2A,AGA,AGK,AGT,AKT1,AKT1S1,AKT2,ALCAM,ALDH1L1,ALDOA,ANXA1,ANXA2,APEX1,API5,ARAF,ARCN1,ARF6,ARIH2,ARL5A,ASAH1,ATF2,BAG1,BAX,BCCIP,BIRC6,BNIP3,BRK1,BSG,C1GALT1,C1QBP,CA3,CACNA1S,CACYBP,CALR,CASP1,CASP3,CASP7,CASP8,CAT,CAV1,CBX1,CCND1,CD320,CD4,CD81,CDC37,CDC42,CDH1,CDK1,CDK2,CDK5,CDK5R1,CDKN2D,CEL,CHD8,CIRBP,CISD1,CISD2,CLIP1,CLYBL,CNN1,CNN2,COL18A1…	388
Cellular Growth and Proliferation	proliferation of cells	A2M,AARS,Abcb1b,ABCB4,ABCB6,ABCC2,ABCC4,abscisic acid,ACACA,ACAN,ACAT1,ACIN1,ACLY,ACP1,ACSL4,ACTN4,ACVR1,ACVR1B,ACVR2A,ADAR,ADARB1,ADK,AGA,AGK,AGO2,AGO3,AGR2,AGT,AGTR2,AHCY,AHNAK,AIFM2,AIMP1,AIMP2,AK2,AK4,AKR1B1,AKR1C1/AKR1C2,AKT1,AKT1S1,AKT2,ALB,ALCAM,ALDH1A2,ALDH1L1,ALDOA,ALOX5,AMFR,Ang4,ANK3,ANPEP,ANXA1,ANXA11,ANXA2,APCDD1,APEX1,API5,APOA1,APPL1,APPL2,ARAF,ARCN1,ARF6,ARFGEF2,ARHGDIA,ARHGDIB,AR…	1009
Cellular Movement	cell movement of tumor cell lines	A2M,ACSL4,ACTN4,AGK,AGR2,AGT,AKT1,AKT2,ALCAM,ANKRD28,ANPEP,ANXA1,ANXA2,AP2M1,AQP8,ARF6,ARFGEF2,ARHGAP35,ARHGDIB,ARPC1B,ARRB2,ATF2,BAG1,BRK1,BSG,C1QBP,C3,C5,CALR,CAP1,CAPN1,CAPNS1,CASP8,CAT,CAV1,CD81,CD9,CDC42,CDH1,CDH2,CDK5,CHST10,CNN1,COL18A1,COL1A1,CRK,CRKL,CSK,CTSB,CTSH,CTSZ,CTTN,CXCL12,CYP2J2,DBF4,DCN,DNAJA3,DNAJB6,DNM2,DOCK2,DPYSL2,EDN1,EGFR,EIF3A,EZR,F2,FABP7,FADD,FAF1,FBLIM1,FERMT2,FGA,FH,…	224
Cellular Movement	invasion of tumor cell lines	A2M,ACAT1,ACSL4,AGO2,AGR2,AGT,AKT1,AKT2,ALCAM,ANXA1,APEX1,AQP8,ARF6,ARHGDIA,BSG,CA3,CALR,CAP1,CAPNS1,CASP3,CAT,CAV1,CBX5,CD9,CDC42,CDH1,CDH2,CDK5,CDK5R1,CDK5RAP3,CHST10,COL18A1,CRK,CSK,CTSB,CTSD,CTSH,CTSK,CTSS,CTSZ,CTTN,CXCL12,CYFIP1,CYP2J2,DCN,DIAPH2,DNAJB6,EDN1,EGFR,EIF3A,EPCAM,EZR,F2,FAF1,FBLIM1,FH,FHIT,FN1,FNBP1L,FSCN1,GATA3,GBP1,GDF15,GIPC1,GNAI1,GNAS,GNB2L1,GPI,HDGF,HMGB1,HMOX1,HPN,HSP90AA1…	165
Cellular Movement	migration of tumor cell lines	A2M,ACSL4,ACTN4,AGK,AGT,AKT1,AKT2,ALCAM,ANKRD28,ANPEP,ANXA1,ANXA2,AP2M1,AQP8,ARF6,ARHGDIB,ARRB2,BAG1,BRK1,BSG,C1QBP,C5,CAPNS1,CASP8,CAT,CAV1,CD81,CD9,CDC42,CDH1,CDH2,CDK5,CHST10,COL18A1,CRK,CRKL,CSK,CTSH,CTSZ,CTTN,CXCL12,CYP2J2,DBF4,DCN,DNAJA3,DNAJB6,DNM2,DPYSL2,EDN1,EGFR,EZR,F2,FABP7,FAF1,FBLIM1,FGA,FH,FN1,FNBP1L,FOXQ1,FSCN1,GATA3,GIPC1,GNA13,GNAI1,GNAI3,GNAS,GNB2L1,GOLGA2,HDGF,HMOX1,HRAS,HSP90A…	174
Digestive System Development and Function, Gastrointestinal Disease, Hepatic System Development and Function, Hepatic System Disease, Inflammatory Disease, Inflammatory Response, Organ Development	inflammation of liver	A2M,ABCB4,ABCC2,ABHD6,ACOX1,ADK,AMY2B,APOA1,ARIH2,C3,C4A/C4B,C5,CAMLG,CASP1,CASP3,CASP7,CBS/LOC102724560,CDH1,DDX5,DRD2,FAH,FKBP1A,FOXJ1,GNMT,GPT,GSTP1,GSTZ1,HLA-A,HMGB1,HMOX1,HP,HPX,IFNA2,IGFBP1,IL12B,IL12RB2,IL2,IL23A,IL6R,IMPDH2,INS,INSR,ITGB2,KRT18,KRT8,LDLR,LECT2,LGALS9,LPIN1,MAT1A,MTA2,MTOR,MTTP,NFE2L2,NR1H4,PDE3B,PDE4B,PHYH,POLB,POR,PPIA,PPP3CC,PPP3R1,PROC,PTPN11,PTPRC,RELA,SCP2,SIRT3,SLC6…	81
Digestive System Development and Function, Hepatic System Development and Function, Organ Development	response of liver	A2M,ABCB4,ABCC2,ABHD6,ACOX1,ADK,AMY2B,APOA1,ARIH2,C3,C4A/C4B,C5,CAMLG,CASP1,CASP3,CASP7,CBS/LOC102724560,CDH1,DDX5,DRD2,FAH,FKBP1A,FOXJ1,GNMT,GPT,GSTP1,GSTZ1,HLA-A,HMGB1,HMOX1,HP,HPX,IFNA2,IGF1,IGFBP1,IL12B,IL12RB2,IL2,IL23A,IL6R,IMPDH2,INS,INSR,ITGB2,KRT18,KRT8,LDLR,LECT2,LGALS3,LGALS9,LPIN1,MAT1A,MTA2,MTOR,MTTP,NFE2L2,NR1H4,PDE3B,PDE4B,PHYH,POLB,POR,PPIA,PPP3CC,PPP3R1,PROC,PTPN11,PTPRC,RELA,SCP…	84
Digestive System Development and Function, Hepatic System Development and Function, Organ Morphology	mass of liver	ABCC2,ACOX1,ACP2,AGT,AIP,APOA1,ARF6,BAG3,BHMT,BSCL2,CAV1,CCNG1,CEL,CES1,CYBRD1,CYP1A1,CYP1A2,DECR1,DRD2,FADS2,FDFT1,FGL1,FST,G6PC,GHRH,GNAS,GNMT,GSTZ1,IGF1,IGF2,INHBA,LDLR,LGMN,LIPA,MAT1A,MET,NFE2L2,NR1H4,PARP1,PCK1,POR,PSAP,RDH16,SC5D,SELENBP1,SLC2A2,SMPD1,SOD2,STARD10,STEAP4,TGFA,THRB,WWOX	53
Digestive System Development and Function, Hepatic System Development and Function, Organ Morphology, Organismal Development	morphology of liver	ABCB4,ADAR,APEX1,APOA1,ARF6,ASAH1,BHMT,BPNT1,BSG,C3,CBS/LOC102724560,CCND1,CDK2,CFC1/CFC1B,CIAPIN1,COL1A1,CP,CRKL,EGFR,FAH,FGA,GAK,GLA,GNMT,GSTZ1,HADHA,HEXA,HEXB,HMGCL,HNF1A,HNF4A,INS,INSR,JUP,KRT8,LDLR,LIPA,MAN2B1,MAN2C1,MAP2K4,MAT1A,MET,MST1,MUT,MYC,MYH10,NEIL1,NOS1,NQO1,NR1H4,NRAS,PCK1,PEX5,PLG,PPT1,PRKAG1,PROC,PSAP,RELA,RGN,SAFB,SCP2,SMAD2,SOD2,SPTBN1,STAT5B	66
Digestive System Development and Function, Hepatic System Development and Function, Organ Morphology, Organismal Development	abnormal morphology of liver	ABCB4,ADAR,APEX1,APOA1,ARF6,ASAH1,BHMT,BPNT1,BSG,C3,CBS/LOC102724560,CDK2,CFC1/CFC1B,CIAPIN1,COL1A1,CP,CRKL,EGFR,FAH,FGA,GLA,GNMT,GSTZ1,HADHA,HEXA,HEXB,HMGCL,HNF1A,JUP,KRT8,LDLR,LIPA,MAN2B1,MAN2C1,MAP2K4,MAT1A,MET,MST1,MUT,MYH10,NEIL1,NOS1,NQO1,NR1H4,NRAS,PCK1,PEX5,PLG,PPT1,PRKAG1,PROC,PSAP,RELA,RGN,SAFB,SCP2,SMAD2,SOD2,SPTBN1	59
Digestive System Development and Function, Hepatic System Development and Function, Organ Morphology, Organismal Development	abnormal morphology of liver parenchyma	ABCB4,BPNT1,CBS/LOC102724560,CP,EGFR,FAH,GSTZ1,HADHA,HEXA,HEXB,HMGCL,HNF1A,KRT8,LIPA,MAN2B1,MAN2C1,MET,MST1,MUT,NOS1,NR1H4,NRAS,PSAP,RELA,RGN,SCP2,SOD2	27
Gastrointestinal Disease, Hepatic System Disease	hepatic steatosis	A2M,ACACA,ACADL,ACADM,ACADVL,ACOT11,ACOX1,ACSL4,ADK,AKT1,ALOX5,ATXN2,BAG3,BHMT,BSCL2,C3,CASP1,CAT,CAV1,CBS/LOC102724560,CCND1,CPT1A,DDC,DECR1,DGAT1,DLK1,EGLN1,EHHADH,FGL1,FOXO1,G6PC,GATM,GLP1R,GNMT,GPD1,GPT,GSTP1,GSTZ1,HADHA,HNF1A,IGFBP1,INS,INSIG2,INSR,KRT8,LDLR,LGALS9,LIPA,LPIN1,MAN2C1,MARK2,MARK3,MAT1A,MOGAT2,MOGAT3,MTTP,MUT,NEIL1,NPC1L1,NR1H4,PARP1,PCCA,PCK1,PDE3B,PDE4B,PHYH,PLA2G15,POR,PTPN1…	80
Organismal Survival	organismal death	A2M,Abcb1b,ABCB4,ABCB6,ABCC4,ACACA,ACADL,ACADM,ACADVL,ACLY,ACSS1,ACTA1,ACTN4,ACVR1,ACVR1B,ACVR2A,ADAR,ADARB1,ADD1,ADH5,ADK,AFMID,AGA,AGO2,AGR2,AGT,AGTR2,AIFM1,AIP,AKT1,AKT2,ALAS2,ALDH1A2,ALDH5A1,ALOX5,AMBP,ANK3,Anp32e,ANXA1,AP1G1,AP2M1,APEX1,APLP2,APOA1,APRT,ARAF,ARF5,ARF6,ARHGAP35,ARHGDIA,ARHGDIB,ARHGEF12,ARIH2,ARL5A,ARRB2,ASAH1,ASNA1,ASPA,ATE1,ATF2,ATN1,ATP1A1,ATP1B1,ATP1B2,ATP2A1,ATP5J2,ATP6AP…	697
